# Environmental Optimization Enables Maintenance of Quiescent Hematopoietic Stem Cells Ex Vivo

Hiroshi Kobayashi<sup>1</sup>, Takayuki Morikawa<sup>1</sup>, Ayumi Okinaga<sup>1</sup>, Fumie Hamano<sup>2</sup>, Tomomi Hashidate-Yoshida<sup>2</sup>, Shintaro Watanuki<sup>1,3</sup>, Daisuke Hishikawa<sup>2</sup>, Hideo Shindou<sup>2,6</sup>, Fumio Arai<sup>5</sup>, Yasuaki Kabe<sup>4</sup>, Makoto Suematsu<sup>4</sup>, Takao Shimizu<sup>2,7</sup>, Keiyo Takubo<sup>1,\*</sup>

<sup>1</sup> Department of Stem Cell Biology, and <sup>2</sup> Department of Lipid Signaling, Research Institute, National Center for Global Health and Medicine, 1-21-1, Toyama, Shinjuku-ku, Tokyo 162-8655, Japan

<sup>3</sup> Division of Hematology, Department of Medicine, and <sup>4</sup> Department of Biochemistry, Keio University School of Medicine, Tokyo 160-8582, Japan

<sup>5</sup> Department of Stem Cell Biology and Medicine, Graduate School of Medical Sciences, Kyushu University, 3-1-1 Maidashi, Higashi-ku, Fukuoka, 812-8582, Japan

<sup>6</sup> Department of Lipid Science, and <sup>7</sup> Department of Lipidomics, Graduate School of Medicine, The University of Tokyo, 7-3-1, Bunkyo-ku, Tokyo 113-0033, Japan

\* Corresponding author and Lead Contact:

Keiyo Takubo, M.D., Ph.D.

Department of Stem Cell Biology, Research Institute

National Center for Global Health and Medicine

1-21-1 Toyama, Shinjuku-ku, Tokyo 162-8655, Japan

keiyot@gmail.com / ktakubo@ri.ncgm.go.jp

1 **SUMMARY**

2 Hematopoietic stem cells (HSCs) maintain lifelong hematopoiesis by remaining quiescent in the bone  
3 marrow niche. Recapitulation of a quiescent state in culture has not been achieved, as cells rapidly  
4 proliferate and differentiate in vitro. After exhaustive analysis of different environmental factor combinations  
5 and concentrations as a way to mimic physiological conditions, we were able to maintain engraftable  
6 quiescent HSCs for 1 month in culture under very low cytokine concentrations, hypoxia, and very high fatty  
7 acid levels. Exogenous fatty acids were required likely due to suppression of intrinsic fatty acid synthesis  
8 by hypoxia and low cytokine conditions. By contrast, high cytokine concentrations or normoxia induced  
9 HSC proliferation and differentiation. Our novel culture system provides a means to evaluate properties of  
10 steady state HSCs and test effects of defined factors *in vitro* under near-physiological conditions.

11

12 **KEYWORDS**

13 hematopoietic stem cell, stem cell culture, stem cell metabolism, fatty acid, hypoxia, stem cell niche

## 1 INTRODUCTION

2 Hematopoietic stem cells (HSCs) maintain lifelong hematopoiesis at steady state and after stress by  
3 producing multipotent progenitors (MPPs), lineage committed progenitors, and their differentiated progeny  
4 within bone marrow niche (Morrison and Scadden, 2014). Cell cycle quiescence distinguishes HSCs from  
5 other hematopoietic progenitors and protects them from stress encountered following bone marrow  
6 transplant, chemotherapy and radiation (Trumpp et al., 2010). HSC capacity can be assessed by  
7 combining transplantation assays with prospective isolation by fluorescence-activated cell sorting (FACS).  
8 Recent studies, however, indicate that when unperturbed HSCs behave differently than they do in a  
9 transplantation setting (Busch et al., 2015; Sun et al., 2014), possibly due to hyperactivation of cytokine  
10 signaling, changes in oxygen status, or lack of niche components.

11 HSC culture *in vitro* is the subject of intense research due to the utility of HSCs to clinical and  
12 basic science applications (Pineault and Abu-Khader, 2015). Functional HSCs have been successfully  
13 maintained or expanded in multiple conditions, including treatment with specific cytokines or signaling  
14 factors (Delaney et al., 2010; Ema et al., 2000; Gammaitoni et al., 2003; Rollini et al., 2004; Rossmannith  
15 et al., 2001), culture in a hypoxic environment (Danet et al., 2003; Hammoud et al., 2012; Mantel et al.,  
16 2015; Shima et al., 2009), co-culture with niche cells (Butler et al., 2012; Isern et al., 2013; Yamaguchi et  
17 al., 2001), transduction with critical regulators (Antonchuk et al., 2002; Kyba et al., 2002), treatment with  
18 SIRT1-inhibitory small molecules, copper chelation, inhibition of aryl hydrocarbon receptors, and activation  
19 of glycolysis (Boitano et al., 2010; Fares et al., 2014; Guo et al., 2018; Peled et al., 2004; Peled et al.,

1 2012; Wagner et al., 2016). Some of these methods have been tested in clinical trials and shown to  
2 promote more durable engraftment (Pineault and Abu-Khader, 2015). However, although we know that  
3 HSCs differ from proliferating HSCs in terms of cell cycling, metabolism, differentiation potential, and stress  
4 resistance (Chandel et al., 2016; Ito and Suda, 2014; Trumpp et al., 2010), less is known about how HSCs  
5 can be kept quiescent *in vitro*.

6 Hypothesizing that conditions favoring quiescence are present in bone marrow but lacking in many culture  
7 systems, we aimed to define a minimal set of factors that would mimic the bone marrow microenvironment  
8 and keep HSCs quiescent and functional *in vitro*. We show here that HSCs have a unique nutrient  
9 requirement for fatty acids. We also optimized environmental conditions, including low cytokine  
10 concentrations and maintenance of hypoxia, to favor maintenance of undifferentiated and quiescent HSCs.  
11 These conditions were equally applicable to both murine and human HSCs. Development of this system  
12 opens an avenue to study steady state HSC properties and manipulate defined factors *in vitro*.

13

## 14 RESULTS

### 15 Fatty acid biosynthesis is insufficient in HSCs cultured in serum-free culture conditions

16 To assess potential changes in gene expression in HSCs after conventional culture, we performed cDNA  
17 microarray analysis comparing HSCs immediately after sorting and HSCs cultured for 16 hours with SCF  
18 and TPO with or without serum (Figure 1A). Genes most significantly upregulated in serum-free culture  
19 conditions were fatty acid and cholesterol biosynthesis-related genes (Figures 1B-1D and S1A), a finding



1 validated by qPCR (Figure 1F). We also observed upregulation of cell division-related genes and  
2 downregulation of stem cell-related genes in cultured versus fresh HSCs, irrespective of the presence or  
3 absence of serum (Figure S1B). Relevant to lipid metabolism, target genes of the master regulator sterol  
4 regulatory element-binding protein SREBP (Figure 1E) were significantly enriched in HSCs cultured in  
5 serum-free conditions compared with freshly sorted HSCs or HSCs cultured in 10% serum (Figures 1C,  
6 S1C, and S1D). Three SREBP isoforms activate partially overlapping targets: SREBP-1c activates  
7 primarily fatty acid synthesis genes, SREBP-2 activates cholesterol-related genes, and SREBP-1a  
8 activates both (Eberlé et al., 2004). Our findings suggest that upregulation of SREBP targets in serum-free  
9 medium may be triggered by a relative shortage of fatty acids or cholesterol. Thus we initially focused on  
10 effects of fatty acids on HSC proliferation. To do so, we cultured HSCs in either serum-free or 10% serum  
11 conditions and blocked various steps of fatty acid biosynthesis using the inhibitors TOFA, cerulenin, or  
12 A939572. HSC proliferation in serum-free conditions was decreased by inhibition of any step in fatty acid  
13 synthesis, whereas addition of 10% serum rescued proliferation activity in the presence of any of these  
14 inhibitors (Figure 1G). These results show that HSCs require fatty acids for proliferation, either through  
15 intrinsic biosynthesis or from an exogenous source.

16

### 17 **Albumin serves as a fatty acid source *in vitro***

18 Most circulating fatty acid is contained in lipoproteins, which are partially hydrolyzed to produce free fatty  
19 acids, which are then bound to albumin as a carrier (Spector, 1975). To determine whether circulating

1 albumin diffuses into the bone marrow cavity as a fatty acid source *in vivo*, we used intravital imaging and  
2 multi-photon microscopy to determine whether FITC-labeled bovine-serum albumin (BSA; MW 66.5kDa)  
3 penetrates the extravascular space of cranial bone marrow. When we injected mice with labeled BSA, we  
4 observed that it gradually diffused into the bone marrow extravascular space over 60 minutes of  
5 observation (Figures 2A and 2B). By contrast, that diffusion pattern was not observed following comparable  
6 injection 150kDa dextran-FITC (Figures 2A and 2B), suggesting that bone marrow vasculature acts as a  
7 size barrier but allows diffusion of circulating albumin, in line with previous reports (Michelsen, 1969;  
8 WASSERMAN and MAYERSON, 1951). Using ELISA analysis, we found that albumin concentration in  
9 bone marrow extracellular fluid was 13 mg/mL, approximately one third that of serum albumin  
10 concentration (Figure S2A). Thus, we chose to utilize BSA as a fatty acid source in *in vitro* culture. As a  
11 first step, we used gas chromatography-mass spectrometry to quantify fatty acid bound to commercially  
12 available batches of BSA (hereafter designated native BSA (nBSA)) by a lipidomics approach. We  
13 observed that saturated and unsaturated fatty acids bound to various lots of nBSA, while levels of fatty  
14 acid bound to BSA defined as "fatty acid-free" (FA-free) were almost negligible (Figure S2B). We then  
15 cultured HSCs and MPPs *in vitro* to evaluate effects of nBSA added to serum-free SF-O3 medium. Addition  
16 of nBSA to the medium promoted HSC and MPP proliferation dose-dependently and to a greater extent  
17 than culture in 10% serum (Figure S2C). We also observed decreased expression of SREBP-target genes  
18 after 16 hours of culture with 4% nBSA, with reconstituted BSA (defined as BSA reconstituted with sodium  
19 palmitate and sodium oleate), or with 10% serum relative to expression levels in 0.1% nBSA or FA-free

1 BSA conditions both in HSCs (Figure 2C) and MPPs (Figure S2E). *Srebf-1* and *-2* mRNA levels were  
2 suppressed by 10% serum, indicating that SREBP activity is partially regulated at the transcriptional level  
3 in HSCs (Figure S2D). Notably, addition of 4% nBSA or reconstituted BSA suppressed expression of not  
4 only fatty acid synthesis genes but of *Pmvk*, a cholesterol synthesis gene, suggesting that fatty acid  
5 deficiency may upregulate expression of cholesterol-related genes (Figures 2C and S2E).

6 Addition of 4% nBSA to mimic serum albumin levels restored HSC proliferation capacity in the  
7 presence of inhibitors of fatty acid synthesis to a level similar to 10% serum conditions, as compared to  
8 0.1% nBSA or 4% FA-free BSA (Figures 2D, and 2E). Effects of fatty acid inhibitors differed with culture  
9 conditions. For example, fatostatin, which blocks post-translational SREBP activation, strongly suppressed  
10 proliferation of HSC-derived colonies in the 10% serum group but not in the FA-free BSA group. Treatment  
11 with cerulenin did not alter HSC-derived colony growth in the FA-free BSA group compared with 0.1%  
12 nBSA group. SREBP target genes were more highly upregulated in the FA-free BSA group, and fatostatin  
13 effects on this upregulation were minimal (Figure 2F). In contrast, fatostatin effectively suppressed  
14 expression of SREBP target genes in the 0.1% nBSA group (Figure 2F). Overall, we conclude that BSA  
15 serves as a fatty acid source in HSC culture and can replace serum in terms of fatty acid supply. Hereafter  
16 we utilized 4% nBSA in HSC culture medium.

17

## 18 Lower cytokine levels and hypoxia maintain phenotypic HSCs

19 Cytokine combinations that favor HSC quiescence *in vitro* remain unclear, although it is known that hypoxia

1 is also critical for quiescence (Cipolleschi et al., 1993; Takubo et al., 2010), with the average physiological  
2 oxygen concentration as low as 1.3% around sinusoid (Spencer et al., 2014). Thus, to determine optimal  
3 culture conditions in the presence of essential cytokines we assessed differentiation and proliferation  
4 following 7 days of culture in various concentrations of SCF (0.33-81ng/mL, or none) and TPO (0.02-  
5 62.5ng/mL, or none) plus 4% BSA, in hypoxic (1% O<sub>2</sub>) or normoxic (20% O<sub>2</sub>) conditions. As expected, we  
6 observed that total numbers of cells derived from HSCs increased in parallel with SCF and TPO levels,  
7 indicating that SCF and TPO promote cell cycling (Figures 3A and S3A). Moreover, at any cytokine  
8 concentration, total cell numbers were lower in hypoxia, as reported (Cipolleschi et al., 1993). Under  
9 hypoxia, the number of megakaryocytes was highest at high TPO/low SCF conditions, while under  
10 normoxia, the number of megakaryocytes increased with increasing SCF and TPO levels (Figures 3B and  
11 S3B). Notably, under either hypoxia or normoxia, cytokine concentrations were negatively correlated with  
12 phenotypic HSC frequency, defined as the CD150<sup>+</sup>CD48<sup>-</sup> fraction in Lineage marker<sup>-</sup>Sca1<sup>+</sup>c-Kit<sup>+</sup> (LSKs),  
13 suggesting that HSCs proliferated and differentiated under high cytokine and normoxic conditions (Figures  
14 3C and S3C). LSK fractions were divided into 4 subgroups based on CD150 and CD48 expression and  
15 the number of cells in each fraction was determined (Figures 3D and S3D). Higher concentrations  
16 (>27ng/mL SCF) promoted HSC loss (Figures 3D and S3D). On the other hand, high TPO (62.5ng/mL) and  
17 low SCF (<3ng/mL) conditions most favored an increase in the number of phenotypic HSCs, with  
18 approximately 40% of cells remaining within the CD150<sup>+</sup>CD48<sup>-</sup> LSK fraction and increasing 2-fold in  
19 number. The number of CD150<sup>-</sup>CD48<sup>-</sup> LSK cells (phenotypic MPP1s) increased with SCF levels, but was

1 not altered by changes in TPO levels, whereas the number of CD150<sup>+</sup>CD48<sup>+</sup> LSK cells (phenotypic  
2 MPP2s) was increased only by increasing TPO concentration (Figures 3D, S3D, and S3E). We conclude  
3 that in vitro the first bifurcation of HSC differentiation into CD150-negative or CD48-positive fractions is  
4 determined by differential responses to SCF or TPO, respectively. Increased partial oxygen pressure also  
5 increased the number of the differentiated CD150<sup>+</sup>CD48<sup>+</sup> and CD150<sup>-</sup>CD48<sup>+</sup> LSK cells. These patterns  
6 differed significantly under 0.1% BSA conditions: in that case, HSC numbers were highest at 100ng/mL  
7 SCF and 100ng/mL TPO, but cells survived at lower (< 3ng/mL SCF) cytokine conditions (Figure S3F).

8 In vivo HSCs remain generally quiescent with minimal output of differentiated cells. Thus, we  
9 assessed HSC maintenance *in vitro* based on 3 criteria: 1) comparison of total cell number at the start and  
10 after 7 days of culture (starting with 300 cells), 2) a minimal (~10 cells) megakaryocyte number, and 3) the  
11 presence of ~100 phenotypic HSCs. Those conditions were met at 3ng/mL SCF, 0.1ng/mL TPO, and 1%  
12 O<sub>2</sub> conditions, while at 20% O<sub>2</sub> cells did not maintain quiescence even at low cytokine conditions (Figure  
13 3E). Colonies of cultured HSCs under optimal conditions appeared much smaller than those grown in  
14 100ng/mL SCF, 100ng/mL TPO, and 20% O<sub>2</sub> conditions (Figure 3F). Greater than 60% of cells in the LSK  
15 fraction resided within the CD150<sup>+</sup>CD48<sup>-</sup> fraction in low cytokine conditions, reflecting minimal  
16 differentiation (Figure 3G).

17

## 18 **Near-physiological culture conditions allow maintenance of functional HSCs**

19 Phenotypic HSCs defined by surface markers are not necessarily functional. Thus we characterized

1 function of HSCs cultured in 3ng/mL SCF, 0.1ng/mL TPO, 4% BSA and 1% O<sub>2</sub> conditions (hereafter, termed  
2 “maintenance conditions”, and see **Methods** for details). We first assessed cell cycle status in maintenance  
3 conditions versus “high cytokine” (100ng/mL SCF and 100ng/mL TPO) conditions favoring proliferation  
4 under either hypoxia or normoxia. After 16 hours of culture and a 2hr EdU pulse, only 4% of cultured HSCs  
5 under maintenance conditions incorporated EdU in contrast to 40% under proliferation conditions (**Figures**  
6 **4A and 4B**). Oxygen concentration slightly activated cell cycle in this time frame, although not significantly  
7 (**Figures 4A and 4B**). The frequency of apoptotic Annexin V<sup>+</sup> propidium iodide (PI)<sup>-</sup> cells was 5% both in  
8 4% nBSA and in the reconstituted BSA groups, and 15% in FA-free BSA group, confirming that fatty acids  
9 are required for cell survival in maintenance conditions (**Figure 4C**).

10 To evaluate repopulation capacity, we transplanted fresh HSCs or HSCs cultured 14 or 27 days  
11 under maintenance or high cytokine conditions plus 4% nBSA and 1% O<sub>2</sub> into lethally-irradiated recipient  
12 mice (**Figure 4D**). HSCs cultured in high cytokine conditions could not maintain repopulation capacity when  
13 cultured for 14 or 27 days (**Figures 4E-4H**), as expected from the *in vitro* mapping indicating HSC  
14 exhaustion (**Figure 3D**). HSCs cultured in maintenance conditions for 14 days exhibited behavior almost  
15 comparable to that of fresh HSCs during both primary and secondary transplantation (**Figure 4E**). Donor  
16 HSC chimerism within bone marrow 4 months after bone marrow transplantation (BMT) was comparable  
17 in fresh and 14-day cultured HSCs (**Figure 4F**). Following 27-31 days of culture, HSCs showed  
18 repopulation capacity at secondary BMT (**Figures 4G, S4D and S4E**) as well as high bone marrow HSC  
19 frequency (**Figures 4H and S4F**) with chimerism, and lymphoid potential varied slightly among

1 experimental replicates (Figures 4G, and S4D-S4H). Cultured HSCs gave rise to red blood cells (RBCs)  
2 and platelets, based on analysis of GFP-expressing donor cells (Figures S4G and S4H). Since the number  
3 of phenotypic HSCs increased at high TPO/low SCF conditions (Figure 3D), we also transplanted HSCs  
4 cultured with 1ng/mL SCF + 100ng/mL TPO in 1% O<sub>2</sub> for 11 days. Chimerism of 5 lineages including RBCs  
5 and platelets was superior to that of fresh HSCs until 2 months post-transplantation and remained  
6 comparable until 4 months (Figures S4A-B, and S4G-H). In contrast, both peripheral blood chimerism at  
7 secondary transplantation or bone marrow HSC chimerism of cultured HSCs was less than that of fresh  
8 HSCs (Figures S4B and S4C), in agreement with the idea that proliferating HSCs show decreased  
9 repopulation capacity (Passegué et al., 2005; Wilson et al., 2008).

10 To assess fatty acid requirements in maintenance conditions, we cultured HSCs for 28 days in  
11 medium containing either 4% nBSA, 4% FA-free BSA, or 4% reconstituted BSA and then performed  
12 transplantation. Peripheral blood chimerism in bone marrow was comparable between the nBSA and  
13 reconstituted BSA groups, while the FA-free BSA group exhibited no engraftment (Figures S4K and S4L),  
14 confirming importance of fatty acids for HSC culture. Notably, although HSC repopulation capacity was  
15 maintained in the 3ng/mL SCF and 0.1ng/mL TPO, 1% O<sub>2</sub>, and 4% nBSA condition for 1 month, the number  
16 of phenotypic HSCs gradually decreased in maintenance conditions, although it was maintained under  
17 1ng/mL SCF and 100ng/mL TPO conditions (Figure S4M). Also, the frequency of functional HSCs  
18 decreased in the maintenance condition as assessed by limiting dilution analysis (data not shown),  
19 suggesting that the maintenance condition does not totally recapitulate the *in vivo* microenvironment.

1

## 2 **Multipotent progenitors retain their marker phenotype in maintenance conditions**

3 Multipotent progenitors (MPPs) differ from HSCs in terms of lower self-renewal capacity and higher cell  
4 cycling activity (Pietras et al., 2015). If our HSC maintenance conditions faithfully recapitulated the native  
5 bone marrow microenvironment, the same conditions should be applicable to the culture of MPPs, as both  
6 MPPs and HSCs are maintained in bone marrow. To confirm this, we examined *in vitro* behavior of CD150<sup>-</sup>  
7 CD41<sup>-</sup>CD48<sup>-</sup>Flt3<sup>-</sup> LSK (MPP1s), CD150<sup>+</sup>CD41/CD48<sup>+</sup>Flt3<sup>-</sup> LSK (MPP2s), CD150<sup>-</sup>CD41/CD48<sup>+</sup>Flt3<sup>-</sup> LSK  
8 (MPP3s), and Flt3<sup>+</sup> LSK (MPP4s) grown in HSC maintenance conditions. Surface markers characteristic  
9 of MPP1, MPP2, and MPP3 cell types were relatively unchanged after 4 days of culture in SCF 3ng/mL  
10 +TPO 0.1ng/mL conditions (Figures S4N and S4O), whereas the number of MPP4 cells greatly decreased,  
11 presumably due to lack of essential factors. Addition of as low as 3ng/mL Flt3 ligand (Flt3L) and 0.02ng/mL  
12 IL-6 to the maintenance condition, on the other hand, increased MPP4 proliferation to a rate higher than  
13 that seen in HSCs under the same culture conditions, a characteristic feature of MPPs (Figures S4P, S4Q,  
14 and S4S). By contrast, MPP4 cells were less proliferative than HSCs in medium lacking Flt3L or IL-6, even  
15 at higher SCF and TPO concentrations (Figures S4R and S4S), indicating high dependence of MPP4 cells  
16 on Flt3L or IL-6.

17

## 18 **Comparison of properties of fresh versus cultured HSCs**

19 As noted, HSCs cultured under maintenance conditions differ from fresh HSCs in terms of lower



1 repopulation capacity following primary transplantation. To understand why, we performed cDNA  
2 microarray analysis to capture the transcriptomic profile (Figure 5A) of fresh HSCs versus HSCs cultured  
3 under maintenance conditions for 7 days with either nBSA or reconstituted BSA. Global gene expression  
4 patterns were similar in fresh HSCs and in HSCs cultured in either nBSA or reconstituted BSA conditions.  
5 Upregulation of fatty acid synthesis or cholesterol synthesis genes was, if not perfectly, normalized  
6 (Figures 5B, and S5A-B) Gene set enrichment analysis for HSC or cell-cycle genes, which were  
7 significantly upregulated in high cytokine condition (Figure S1B), was comparable in fresh and cultured  
8 HSCs (Figure 5C). The most prominent difference between fresh and cultured HSCs was upregulation of  
9 megakaryocyte-related genes in cultured HSCs under either nBSA or reconstituted BSA conditions.  
10 (Figure S5B).

11 We next assessed heterogeneity of gene expression in either fresh or cultured HSCs at the single  
12 cell level by performing single-cell qPCR (sc-qPCR) analysis (Figure 5D). Principal component analysis  
13 (PCA) showed that cultured HSCs skewed in both PC1-positive and PC2-positive directions in a pattern  
14 overlapping that of fresh HSCs (Figure 5E). Expression levels of HSC markers, including *Cttna1* (Acar et  
15 al., 2015), *Vwf* (Sanjuan-Pla et al., 2013), and *Gpr56* (Solaimani Kartalaei et al., 2015) or the  
16 representative HSC transcription factors *Gata2* (de Pater et al., 2013), *Pbx1* (Ficara et al., 2008), *Tal1*  
17 (Shivdasani et al., 1995), and *Erg* (Loughran et al., 2008), were all high in cultured HSCs, while *Fgd5*  
18 (Gazit et al., 2014), *Procr* (Kent et al., 2009), and *Evi1* (Kataoka et al., 2011) expression showed cell-to-  
19 cell variability (Figures 5F and S5C), which caused a skew in the principal component space. Among

1 differentiation markers, megakaryocytic genes including *Mpl*, *Epor*, *CD9*, *F2r*, and *Itga2b* (encoding CD41)  
2 were upregulated in the cultured HSCs, consistent with the microarray analysis (Figures S5B and S5D).  
3 On the other hand, lymphoid and myeloid differentiation-related genes, such as *Flt3* and *Csf3r* (encoding  
4 G-CSF receptor), were downregulated in cultured HSCs (Figure S5C and S5D). Fatty-acid and cholesterol  
5 synthesis genes remained highly expressed in a fraction of cells, while genes encoding enzymes  
6 catalyzing fatty-acid oxidation were unchanged (Figures S5C and S5D). A correlation coefficient matrix  
7 with hierarchical clustering revealed that some HSC-related genes expressed in fresh HSCs, such as *Egr1*,  
8 *Fgd5*, *Evi1*, and *Procr*, formed a cluster with the myeloid-, and lymphoid-related genes *Csf3r*, *Irf8*, *Flt3*, and  
9 *Ikzf1*, whereas in cultured cells HSC-related *Vwf*, *Cttna1*, and *Pbx1* formed a cluster with megakaryocytic  
10 genes as well as fatty acid synthesis genes (Figures 5G and S5E).

11

## 12 **Insulin induces a megakaryocytic differentiation program *in vitro***

13 We next modified the HSC culture medium as a means to establish gene expression patterns more closely  
14 resembling those seen in fresh HSCs. Further addition of fatty acids or fatty acids plus cholesterol to 4%  
15 nBSA medium dose-dependently downregulated *Scd1* and *Pmvk* expression to levels seen in fresh HSCs,  
16 while the megakaryocyte genes or *Evi1* or *Flt3* remained unchanged (Figure 5H). The medium used in our  
17 experiments, SF-O3, contains supraphysiologically high insulin levels (~10000-fold higher than serum  
18 concentration), which potentially activates AKT signaling and alters gene expression activating the IGF1  
19 receptor. Decreasing insulin levels in maintenance medium downregulated expression of *Gata1* and *Sdpr*,

1 suggesting that insulin induces a megakaryocytic program (Figure 5I). In support of this idea,  
2 megakaryocyte number was positively correlated with insulin levels in the medium (Figure S5F).  
3 Interestingly, CD41 expression was inversely correlated with insulin concentration (Figure S5F). Addition  
4 of cholesterol to maintenance medium moderately increased the number of phenotypic HSCs at higher  
5 insulin concentrations, based on analysis of Sca-1 (Figure S5F). Both Evi1 and Flt3 expression was  
6 downregulated in any condition tested, although the mechanism remains unknown (Figures 5H-I, and S5F).  
7 Altogether, higher concentrations of fatty acid and cholesterol and reduced insulin levels altered gene  
8 expression patterns in cultured HSCs in a manner more closely resembling those seen in fresh HSCs, with  
9 the exception in Evi1 or Flt3 expression.

10

### 11 **Low cytokine levels and hypoxia increase HSC dependence on extrinsic fatty acids**

12 As noted, cytokine concentration is a major quiescence/differentiation fate-determinant for HSCs *in vitro*.  
13 Since activity of cytokine target genes is strictly regulated in HSCs *in vivo* (Lee et al., 2010; Seita et al.,  
14 2007), we examined phosphorylation of SCF and TPO targets using intracellular flow cytometry. Targets  
15 analyzed were S6, ERK1/2, and STAT5, which are representative effectors of AKT, MAPK, and JAK/STAT  
16 signaling, respectively. To do so, we treated HSPC fractions from freshly isolated whole bone marrow cells  
17 with various combinations of SCF (0.33-81ng/mL, or none) and TPO (0.5-121.5ng/mL, or none) or with  
18 none for 10 to 30 minutes (Figures 6A and S6A-B). Relevant to signaling, HSCs are responsive to both  
19 SCF and TPO, whereas MPP cells respond primarily to SCF, reflecting HSC-specific expression of the

1 TPO receptor c-Mpl (Buza-Vidas et al., 2006; Yoshihara et al., 2007). ERK phosphorylation increased with  
2 SCF concentration in each HSPC fraction, whereas S6 was more highly phosphorylated in HSCs than in  
3 MPPs in response to either SCF or TPO. In maintenance conditions (SCF 3ng/mL + TPO 0.1ng/mL;  
4 marked by an X in Figure 6A), both S6 and ERK were partially phosphorylated in all HSPC fractions.  
5 Moreover, in maintenance conditions, STAT5 phosphorylation in HSCs or MPPs was comparable and  
6 lower than that seen in HSCs treated with a high concentration (>13.5ng/mL) of TPO (Figures 6A and S6A-  
7 B). These results indicate that minimal activation of ERK and AKT signaling is required for HSC  
8 maintenance *in vitro*.

9           Next, we examined the nBSA requirement for HSC survival at lower cytokine concentrations (3-  
10 9ng/mL SCF) under hypoxia or normoxia. In 0.1% nBSA medium, HSCs did not survive at any SCF  
11 concentration, and the effect was exacerbated under 1% O<sub>2</sub> conditions (Figure 6B). To test whether  
12 cytokine concentration or oxygen partial pressure positively regulates expression levels of genes  
13 functioning in fatty acid or cholesterol synthesis, we performed qPCR using fresh HSCs or HSCs cultured  
14 16 hours in either 3ng/mL or 100ng/mL SCF, under 1% or 20% O<sub>2</sub> conditions. Upregulation of Scd1 or  
15 Pmvk, which had been seen in HSCs cultured in 100ng/mL SCF, was suppressed at 3ng/mL SCF,  
16 independently of oxygen level. These observations may account for the requirement for higher nBSA levels  
17 under low cytokine conditions (Figure 6C). To identify signaling pathways relevant to fatty acid synthesis,  
18 HSCs cultured in 0.1% nBSA medium were treated with small molecule inhibitors of downstream cytokine  
19 targets for 16 hours and evaluated for Scd1 and Pmvk expression. Treatment with AKT, PI3K, or JAK

1 inhibitors decreased expression levels of *Scd1* and *Pmvk*, while a MEK inhibitor did not. Thus, PI3K/AKT  
2 and JAK signaling, but not that of MEK/ERK, likely mediates upregulated expression of fatty-acid and  
3 cholesterol synthesis genes (Figure 6D). We then evaluated HSC survival in media containing  
4 reconstituted BSA, the presence of reconstituted BSA dose-dependently rescued HSC survival (Figure  
5 6E), a finding confirmed in transplantation analysis (Figures S4K-L). Inhibition of fatty acid synthesis or  $\beta$ -  
6 oxidation did not alter the number of HSCs cultured with 4% nBSA or 4% reconstituted BSA, indicating  
7 minimal dependence on these intrinsic pathways *in vitro* (Figure 6F). Of note, AKT inhibition in  
8 maintenance conditions in the presence of nBSA significantly decreased HSC number, suggesting that a  
9 dose determines whether AKT has a positive or negative effect on HSC maintenance (Figure S6C).  
10 Collectively, our findings suggest that HSCs incorporate extrinsic fatty acids for maintenance at lower  
11 cytokine levels and in hypoxia to compensate for compromised fatty acid biosynthesis.

12

### 13 **Human HSCs require both fatty acid and cholesterol for maintenance**

14 We next assessed our maintenance conditions in cultures of human HSCs. First, we created a cytokine  
15 response map as we had in murine HSCs (Figure 3) using adult human bone marrow CD34<sup>+</sup>CD38<sup>-</sup>  
16 CD90<sup>+</sup>CD45RA<sup>-</sup> cells cultured with various SCF (0.3-81ng/mL, or none) and TPO (0.02-62.5ng/mL, or  
17 none) combinations under 1% O<sub>2</sub> and 4% nBSA conditions. Like murine HSCs, human HSC proliferation  
18 paralleled cytokine concentration (Figure 7A). One striking difference, however, was that human HSCs  
19 depended more on TPO, with few cells remaining after a 7-day culture in TPO levels <1ng/mL (Figure 7A).

1 Addition of FLT3L slightly rescued SCF and TPO dependence (data not shown). The number of total cells  
2 or CD34<sup>+</sup>CD38<sup>-</sup> HSPCs was maintained at either SCF 3ng/mL + TPO 3ng/mL or SCF 1ng/mL +TPO  
3 100ng/mL (Figure 7B). Human HSCs cultured under low cytokine levels and hypoxic conditions required  
4 nBSA for survival (Figure 7C).

5 Next we examined fatty acid or cholesterol requirements using human HSCs. Addition of fatty  
6 acid alone to cultures containing nBSA dose-dependently decreased HSC number, while further addition  
7 cholesterol rescued HSC numbers (Figure 7D), suggesting a greater dependence on cholesterol by human  
8 HSCs. To determine fatty acid and cholesterol levels optimal for human HSC survival, we added varying  
9 (100-400µg/mL, or none) levels of a fatty acid cocktail, either with or without cholesterol, to nBSA (Figure  
10 S7B) and evaluated effects of those BSA preparations versus FA-free BSA (Figure S7D) in HSC cultures  
11 containing SCF and TPO at 3ng/mL each. The highest yield of HSCs was seen following culture in  
12 200µg/mL cocktail plus either 20 or 40µg/mL cholesterol. Only a small increase in total cell number was  
13 seen in the nBSA condition (Figure S7B). In FA-free BSA cultures, total numbers of HSCs greatly  
14 decreased (Figure S7D), indicating that fatty acids and cholesterol are required for human HSC culture in  
15 low cytokine conditions. We then cultured HSCs in media containing SCF and TPO (both at 3ng/mL) and  
16 4% nBSA plus 200µg/mL fatty acids and 20µg/mL cholesterol in 1% O<sub>2</sub>. (Hereafter, we designate nBSA  
17 plus 200µg/mL fatty acids/20µg/mL cholesterol as "enhanced BSA".) We observed that ~90% of cells  
18 exhibited a CD34<sup>+</sup>CD38<sup>-</sup> marker phenotype, and 40% exhibited a CD90<sup>+</sup>CD45RA<sup>-</sup> phenotype after 7 days  
19 of culture (Figure S7C), indicating that human HSCs remain quiescent with at least partially an

1 undifferentiated phenotypes. To determine whether insulin is required for human HSC survival, we cultured  
2 HSCs under several insulin concentrations for 7 days. The number of human HSCs remaining in culture  
3 increased with insulin concentration, suggesting that insulin is required for HSC survival (Figure S7E). We  
4 then used qPCR analysis for human HSCs to determine if low expression of fatty acid and cholesterol  
5 synthesis genes seen at lower cytokine ranges underlies dependence on fatty acid and cholesterol. Like  
6 murine HSCs, human HSCs showed lower expression of some of fatty acid synthesis genes (ACLY, FASN,  
7 ACACA) at 3ng/mL compared to 100ng/mL SCF conditions. Interestingly, we did not detect PMVK mRNA  
8 in human HSCs in any conditions tested, including under fatty-acid-free conditions, supporting the high  
9 dependence of human HSCs on extrinsic cholesterol (Figure 7E). Fatty acid synthesis inhibition at high  
10 cytokine (50ng/mL SCF, 50ng/mL TPO, and 50ng/mL FLT3L) and normoxic conditions antagonized cell  
11 proliferation in both 0.1% nBSA or 4% FA-free BSA conditions, although inhibitor effects differed among  
12 groups (Figure S7F). In high or low cytokine conditions, cell number was maintained in the 4% nBSA  
13 condition, confirming dependence on extrinsic fatty acids (Figure S7F). Interestingly, cerulenin and  
14 fatostatin inhibited proliferation and survival of human HSCs cultured in 10% serum (Figure S7F), an  
15 outcome observed in analysis of murine HSCs (Figures 1G and 2E). Finally we evaluated the *in vivo*  
16 function of cultured human HSCs by transplanting them into immunocompromised NOD/Shi-scid, IL-2R $\gamma$   
17 knockout (NOG) mice. HSCs were transplanted immediately after sorting or cultured with 3ng/mL SCF  
18 +3ng/mL TPO either with 4% enhanced BSA or 4% FA-free BSA under 1% O<sub>2</sub> conditions. Three months  
19 after transplantation, the enhanced BSA group contributed equally to peripheral blood chimerism, relative

1 to fresh HSCs, and showed a balanced output of B cell, T cell, and myeloid lineages. By contrast, the FA-  
2 free group contributed less to the peripheral blood chimerism than did either fresh or enhanced BSA groups  
3 (Figures 7F and 7G), indicating that supplementation with fatty acid and cholesterol favors HSC  
4 maintenance *in vitro* (Figures 7F-H).

5

## 6 DISCUSSION

7 Manipulation of HSCs *in vitro* requires technology to maintain them in an environment resembling bone  
8 marrow. Here, we devised a near-physiological condition to maintain quiescent HSCs *in vitro* with defined  
9 factors. Key features of our culture conditions were adequate supplementation of fatty acid (and cholesterol,  
10 in the case of human HSCs), a low cytokine concentration, and hypoxia. Proper metabolic activity plays  
11 crucial role in regulating HSC survival and function *in vivo*. We show here that metabolic changes induced  
12 by conventional HSC culture were minimized by exogenous fatty acid. Fatty acids serve to maintain cellular  
13 membrane properties (Currie et al., 2013) or signaling and in energy production through  $\beta$ -oxidation (Ito et  
14 al., 2012). Previously, Ito et al (2012) reported that treatment of HSCs with a  $\beta$ -oxidation inhibitor induced  
15 a loss of HSC maintenance. By contrast, here, we observed minimal effects of treatment of HSCs with  $\beta$ -  
16 oxidation inhibitor, suggesting that fatty acids provide essential membrane components or signaling factors  
17 but do not function in energy production in this context (Figure 6F). Ito et al. inhibited  $\beta$ -oxidation to promote  
18 *in vitro* HSC division under high cytokine conditions (50 ng/mL SCF, 50 ng/mL TPO) in which HSCs may  
19 require greater energy production. Thus, discrepancies between that study and ours may attributable to



1 differences in culture conditions. We did not test *in vivo* inhibition of  $\beta$ -oxidation; however, we do not  
2 exclude the possibility that quiescent HSCs are more dependent on fatty acid oxidation than on fatty acid  
3 synthesis *in vivo*, given that expression of fatty acid synthesis genes are suppressed in freshly-isolated  
4 HSCs (Figure 1A).

5           Recently, liver-derived TPO was shown to extrinsically regulate HSCs outside bone marrow  
6 (Decker et al., 2018). Liver-derived circulating albumin may be another liver-derived molecule regulating  
7 HSC dynamics *in vivo*. Particularly in human HSCs, cholesterol was required for HSC maintenance,  
8 possibly due to lack of PMVK expression in human HSCs. Cholesterol regulates membrane homeostasis  
9 and protein modification and provides steroid analogues including bile acid, all required for HSC  
10 maintenance (Sigurdsson et al., 2016). Notably, cholesterol is required for HSCs, especially at high fatty  
11 acid levels (Figure 7D); thus HSC maintenance may require a proper fatty acid/cholesterol balance more  
12 than an absolute level cholesterol. Defined media used previously for HSC culture may not have contained  
13 sufficient levels of cholesterol to allow proper HSC maintenance.

14           Lower cytokine concentrations are critical to maintain HSCs in an immature state but may  
15 insufficient for de novo biosynthesis of essential factors such as fatty acids (as shown here), possibly due  
16 to suppressed expression of biosynthetic enzymes. These results are consistent with accumulating finding  
17 showing that AKT activation perturbs HSC maintenance and that quiescent HSCs are metabolically  
18 inactive (Chandel et al., 2016). Average oxygen concentration is as low as 1.3% around the sinusoid of  
19 bone marrow (Spencer et al., 2014). That hypoxic environment plays an important role in HSC quiescence,

1 glycolytic metabolism, and retention in the niche (Cipolleschi et al., 1993; Takubo et al., 2010). Hypoxia  
2 reportedly maintains proper function and decreases cycling of cultured human HSCs (Danet et al., 2003).  
3 By combining lower cytokine and higher fatty acid concentrations with hypoxia, we enhanced this activity  
4 and established a low proliferation state *in vitro*. In our system, hypoxia suppressed HSC differentiation by  
5 modulating responses to cytokines: HSC maintenance was enhanced by SCF, while megakaryocyte  
6 differentiation was suppressed by TPO. In addition, hypoxia conferred nBSA dependence on HSCs,  
7 especially in low SCF conditions. In addition to physiologically low oxygen tension in the bone marrow  
8 space (Spencer et al., 2014), free SCF concentrations in bone marrow fluid are also kept low (Asik et al.,  
9 2003). Also, albumin concentrations in serum are approximately 3.5-5.0% w/v. Thus, HSC nutrient and  
10 environmental requirements as defined here closely follow physiological conditions of oxygen, cytokines,  
11 and fatty acid-bound albumin, and our system allows assessment of factors that regulate HSC cell cycle  
12 and/or differentiation status.

13         Although we achieved 1-month maintenance of functional HSCs *in vitro*, our system does not  
14 fully recapitulate HSC conditions *in vivo*. For example, we observed 1) gradual loss of HSC markers that  
15 normally show robust expression *in vivo*, among them, CD150 and Evi1, 2) lower chimerism, especially  
16 after primary transplantation with lower lymphoid potential, and 3) higher expression of genes marking  
17 aging HSCs, such as CD41. These differences are likely due to conditions or factors missing in the current  
18 culture condition. Cytokine levels in the bone marrow microenvironment depend on many variables,  
19 including local concentration, distances from cytokine sources (which change over time due to HSC

1 movement), diffusion coefficients of each molecule, and cytokine sequestration by soluble or membrane-  
2 bound receptors. All of these factors make defining cytokine conditions in the HSC environment *in vivo*  
3 challenging, and fine temporal manipulation of extracellular cytokine concentration may improve HSC  
4 maintenance in culture. Nutrients other than fatty acids, such as glucose (Takubo et al., 2013), amino acids  
5 (Taya et al., 2016), and BSA contaminants (Ieyasu et al., 2017) may also modulate HSC fate, as may lipid  
6 components. Comprehensive nutrient and cytokine optimization as well as more accurate measurement  
7 of extrinsic factors in the native bone marrow will facilitate reconstitution of the bone marrow  
8 microenvironment *ex vivo*.

9         The system defined here has numerous potential benefits for HSC research and engineering. A  
10 more efficient culture system will allow (1) better analysis of HSC behavior in *ex vivo* conditions, (2) detailed  
11 characterization of HSC-specific effects of cytokines or chemical compounds, and (3) improved  
12 engineering of HSCs for gene therapy by minimizing differentiation or loss of stem cell capacity. These  
13 merits are equally beneficial to the capture of HSCs generated from pluripotent stem cells. The new system  
14 also provides insight into HSPC behavior *in vivo*. HSCs are by nature slow-cycling in the absence of factors  
15 except for SCF and TPO, and some conditions preferentially activate the MPP4 cell cycle, raising the  
16 possibility that a specialized niche favoring HSC rather than MPP quiescence is not necessary. HSCs and  
17 MPPs may behave differently under identical conditions in terms of cell cycle activation and self-renewal  
18 capacity. Also, this culture system enables analysis of HSC heterogeneity or of gradual changes in HSC  
19 composition that occur within the HSC pool. Overall, the *ex vivo* system described here will further

1 facilitates analyses of HSC function and dynamics and enable more efficient manipulation of HSCs.

2

### 3 **ACKNOWLEDGEMENTS**

4 We thank all members of the Takubo laboratory for indispensable support; M. Haraguchi and S. Tamaki  
5 for technical support and laboratory management; and E. Lamar for preparation of the manuscript. KT was  
6 supported in part by KAKENHI Grants from MEXT/JSPS (26115005, 18H02845, 18K19570, 26115001,  
7 15K21751), a grant of the National Center for Global Health and Medicine (26-001, 29-2007), AMED-  
8 CREST (JP18gm0710010), an AMED grant for Realization of Regenerative Medicine (JP18bm0704011)  
9 and grants from the Japan Leukemia Research Fund, the Japan Rheumatism Foundation, the Takeda  
10 Science Foundation, the Senshin Medical Research Foundation, and the Japanese Society for  
11 Hematology. HK was supported in part by a KAKENHI Grant (17K16200), a grant of the National Center  
12 for Global Health and Medicine (29-1015) and a grant from the Uehara Memorial Foundation. HS was  
13 supported in part by AMED-CREST (JP18gm0910011 and JP18gm0710002). MS was the leader of JST  
14 ERATO Suematsu Gas Biology until March 2015, which provided infrastructure for multi-photon laser  
15 confocal microscopy, essential to accomplish the aim of this current study.

16

### 17 **AUTHOR CONTRIBUTIONS**

18 H.K., T.M., A.O., F.H., S.W., and T.H.-Y. performed the study and analyzed data; G.N., D.H., H.S., F.A., Y.K.,  
19 M.S., and T.S. provided scientific advice and materials. H.K. and K.T. wrote the manuscript. K.T. conceived

1 the project and supervised the research.

2

3 **DECLARATION OF INTERESTS**

4 The authors declare no competing interest.

5

6

## 1 REFERENCES

- 2 Acar, M., Kocherlakota, K.S., Murphy, M.M., Peyer, J.G., Oguro, H., Inra, C.N., Jaiyeola, C., Zhao, Z., Luby-  
3 Phelps, K., and Morrison, S.J. (2015). Deep imaging of bone marrow shows non-dividing stem cells are mainly  
4 perisinusoidal. *Nature* 526, 126-130.
- 5 Antonchuk, J., Sauvageau, G., and Humphries, R.K. (2002). HOXB4-induced expansion of adult hematopoietic  
6 stem cells ex vivo. *Cell* 109, 39-45.
- 7 Asik, M., Karakus, S., Haznedaroglu, I.C., Goker, H., Ozatli, D., Buyukasik, Y., Sayinalp, N., Ozcebe, O.I., and  
8 Kirazli, S. (2003). Bone marrow and peripheral blood C-kit ligand concentrations in patients with thrombocytosis  
9 and thrombocytopenia. *Hematology* 8, 369-373.
- 10 Boitano, A.E., Wang, J., Romeo, R., Bouchez, L.C., Parker, A.E., Sutton, S.E., Walker, J.R., Flaveny, C.A.,  
11 Perdew, G.H., Denison, M.S., *et al.* (2010). Aryl hydrocarbon receptor antagonists promote the expansion of  
12 human hematopoietic stem cells. *Science* 329, 1345-1348.
- 13 Busch, K., Klapproth, K., Barile, M., Flossdorf, M., Holland-Letz, T., Schlenner, S.M., Reth, M., Höfer, T., and  
14 Rodewald, H.R. (2015). Fundamental properties of unperturbed haematopoiesis from stem cells in vivo. *Nature*  
15 518, 542-546.
- 16 Butler, J.M., Gars, E.J., James, D.J., Nolan, D.J., Scandura, J.M., and Rafii, S. (2012). Development of a  
17 vascular niche platform for expansion of repopulating human cord blood stem and progenitor cells. *Blood* 120,  
18 1344-1347.
- 19 Buza-Vidas, N., Antonchuk, J., Qian, H., Månsson, R., Luc, S., Zandi, S., Anderson, K., Takaki, S., Nygren, J.M.,  
20 Jensen, C.T., *et al.* (2006). Cytokines regulate postnatal hematopoietic stem cell expansion: opposing roles of  
21 thrombopoietin and LNK. *Genes Dev* 20, 2018-2023.
- 22 Chandel, N.S., Jasper, H., Ho, T.T., and Passegué, E. (2016). Metabolic regulation of stem cell function in tissue  
23 homeostasis and organismal ageing. *Nat Cell Biol* 18, 823-832.
- 24 Cipolleschi, M.G., Dello Sbarba, P., and Olivotto, M. (1993). The role of hypoxia in the maintenance of  
25 hematopoietic stem cells. *Blood* 82, 2031-2037.

- 1 Currie, E., Schulze, A., Zechner, R., Walther, T.C., and Farese, R.V. (2013). Cellular fatty acid metabolism and  
2 cancer. *Cell Metab* 18, 153-161.
- 3 Danet, G.H., Pan, Y., Luongo, J.L., Bonnet, D.A., and Simon, M.C. (2003). Expansion of human SCID-  
4 repopulating cells under hypoxic conditions. *J Clin Invest* 112, 126-135.
- 5 de Pater, E., Kaimakis, P., Vink, C.S., Yokomizo, T., Yamada-Inagawa, T., van der Linden, R., Kartalaei, P.S.,  
6 Camper, S.A., Speck, N., and Dzierzak, E. (2013). Gata2 is required for HSC generation and survival. *J Exp*  
7 *Med* 210, 2843-2850.
- 8 Decker, M., Leslie, J., Liu, Q., and Ding, L. (2018). Hepatic thrombopoietin is required for bone marrow  
9 hematopoietic stem cell maintenance. *Science* 360, 106-110.
- 10 Delaney, C., Heimfeld, S., Brashem-Stein, C., Voorhies, H., Manger, R.L., and Bernstein, I.D. (2010). Notch-  
11 mediated expansion of human cord blood progenitor cells capable of rapid myeloid reconstitution. *Nat Med* 16,  
12 232-236.
- 13 Eberlé, D., Hegarty, B., Bossard, P., Ferré, P., and Fougère, F. (2004). SREBP transcription factors: master  
14 regulators of lipid homeostasis. *Biochimie* 86, 839-848.
- 15 Ema, H., Takano, H., Sudo, K., and Nakauchi, H. (2000). In vitro self-renewal division of hematopoietic stem  
16 cells. *J Exp Med* 192, 1281-1288.
- 17 Fares, I., Chagraoui, J., Gareau, Y., Gingras, S., Ruel, R., Mayotte, N., Csaszar, E., Knapp, D.J., Miller, P.,  
18 Ngom, M., *et al.* (2014). Cord blood expansion. Pyrimidoindole derivatives are agonists of human hematopoietic  
19 stem cell self-renewal. *Science* 345, 1509-1512.
- 20 Ficara, F., Murphy, M.J., Lin, M., and Cleary, M.L. (2008). Pbx1 regulates self-renewal of long-term  
21 hematopoietic stem cells by maintaining their quiescence. *Cell Stem Cell* 2, 484-496.
- 22 Gammaitoni, L., Bruno, S., Sanavio, F., Gunetti, M., Kollet, O., Cavalloni, G., Falda, M., Fagioli, F., Lapidot, T.,  
23 Aglietta, M., *et al.* (2003). Ex vivo expansion of human adult stem cells capable of primary and secondary  
24 hemopoietic reconstitution. *Exp Hematol* 31, 261-270.
- 25 Gazit, R., Mandal, P.K., Ebina, W., Ben-Zvi, A., Nombela-Arrieta, C., Silberstein, L.E., and Rossi, D.J. (2014).

- 1 Fgd5 identifies hematopoietic stem cells in the murine bone marrow. *J Exp Med* 211, 1315-1331.
- 2 Guo, B., Huang, X., Lee, M.R., Lee, S.A., and Broxmeyer, H.E. (2018). Antagonism of PPAR- $\gamma$  signaling  
3 expands human hematopoietic stem and progenitor cells by enhancing glycolysis. *Nat Med* 24, 360-367.
- 4 Hammoud, M., Vlaski, M., Duchez, P., Chevaleyre, J., Lafarge, X., Boiron, J.M., Praloran, V., Brunet De La  
5 Grange, P., and Ivanovic, Z. (2012). Combination of low O<sub>2</sub> concentration and mesenchymal stromal cells  
6 during culture of cord blood CD34(+) cells improves the maintenance and proliferative capacity of  
7 hematopoietic stem cells. *J Cell Physiol* 227, 2750-2758.
- 8 Ieyasu, A., Ishida, R., Kimura, T., Morita, M., Wilkinson, A.C., Sudo, K., Nishimura, T., Ohehara, J., Tajima, Y.,  
9 Lai, C.Y., *et al.* (2017). An All-Recombinant Protein-Based Culture System Specifically Identifies Hematopoietic  
10 Stem Cell Maintenance Factors. *Stem Cell Reports* 8, 500-508.
- 11 Isern, J., Martín-Antonio, B., Ghazanfari, R., Martín, A.M., López, J.A., del Toro, R., Sánchez-Aguilera, A.,  
12 Arranz, L., Martín-Pérez, D., Suárez-Lledó, M., *et al.* (2013). Self-renewing human bone marrow mesospheres  
13 promote hematopoietic stem cell expansion. *Cell Rep* 3, 1714-1724.
- 14 Ito, K., Carracedo, A., Weiss, D., Arai, F., Ala, U., Avigan, D.E., Schafer, Z.T., Evans, R.M., Suda, T., Lee, C.H.,  
15 *et al.* (2012). A PML-PPAR- $\delta$  pathway for fatty acid oxidation regulates hematopoietic stem cell maintenance.  
16 *Nat Med* 18, 1350-1358.
- 17 Ito, K., and Suda, T. (2014). Metabolic requirements for the maintenance of self-renewing stem cells. *Nat Rev*  
18 *Mol Cell Biol* 15, 243-256.
- 19 Kataoka, K., Sato, T., Yoshimi, A., Goyama, S., Tsuruta, T., Kobayashi, H., Shimabe, M., Arai, S., Nakagawa,  
20 M., Imai, Y., *et al.* (2011). Evi1 is essential for hematopoietic stem cell self-renewal, and its expression marks  
21 hematopoietic cells with long-term multilineage repopulating activity. *J Exp Med* 208, 2403-2416.
- 22 Kent, D.G., Copley, M.R., Benz, C., Wöhrer, S., Dykstra, B.J., Ma, E., Cheyne, J., Zhao, Y., Bowie, M.B.,  
23 Gasparetto, M., *et al.* (2009). Prospective isolation and molecular characterization of hematopoietic stem cells  
24 with durable self-renewal potential. *Blood* 113, 6342-6350.
- 25 Kiel, M.J., Yilmaz, O.H., Iwashita, T., Terhorst, C., and Morrison, S.J. (2005). SLAM family receptors distinguish



- 1 hematopoietic stem and progenitor cells and reveal endothelial niches for stem cells. *Cell* 121, 1109-1121.
- 2 Kyba, M., Perlingeiro, R.C., and Daley, G.Q. (2002). HoxB4 confers definitive lymphoid-myeloid engraftment  
3 potential on embryonic stem cell and yolk sac hematopoietic progenitors. *Cell* 109, 29-37.
- 4 Lee, J.Y., Nakada, D., Yilmaz, O.H., Tothova, Z., Joseph, N.M., Lim, M.S., Gilliland, D.G., and Morrison, S.J.  
5 (2010). mTOR activation induces tumor suppressors that inhibit leukemogenesis and deplete hematopoietic  
6 stem cells after Pten deletion. *Cell Stem Cell* 7, 593-605.
- 7 Loughran, S.J., Kruse, E.A., Hacking, D.F., de Graaf, C.A., Hyland, C.D., Willson, T.A., Henley, K.J., Ellis, S.,  
8 Voss, A.K., Metcalf, D., *et al.* (2008). The transcription factor Erg is essential for definitive hematopoiesis and  
9 the function of adult hematopoietic stem cells. *Nat Immunol* 9, 810-819.
- 10 Mantel, C.R., O'Leary, H.A., Chitteti, B.R., Huang, X., Cooper, S., Hangoc, G., Brustovetsky, N., Srour, E.F., Lee,  
11 M.R., Messina-Graham, S., *et al.* (2015). Enhancing Hematopoietic Stem Cell Transplantation Efficacy by  
12 Mitigating Oxygen Shock. *Cell* 161, 1553-1565.
- 13 Michelsen, K. (1969). Determination in inulin, albumin and erythrocyte spaces in the bone marrow of rabbits.  
14 *Acta Physiol Scand* 77, 28-35.
- 15 Morrison, S.J., and Scadden, D.T. (2014). The bone marrow niche for haematopoietic stem cells. *Nature* 505,  
16 327-334.
- 17 Passegué, E., Wagers, A.J., Giuriato, S., Anderson, W.C., and Weissman, I.L. (2005). Global analysis of  
18 proliferation and cell cycle gene expression in the regulation of hematopoietic stem and progenitor cell fates. *J*  
19 *Exp Med* 202, 1599-1611.
- 20 Peled, T., Landau, E., Mandel, J., Glukhman, E., Goudsmid, N.R., Nagler, A., and Fibach, E. (2004). Linear  
21 polyamine copper chelator tetraethylenepentamine augments long-term ex vivo expansion of cord blood-  
22 derived CD34+ cells and increases their engraftment potential in NOD/SCID mice. *Exp Hematol* 32, 547-555.
- 23 Peled, T., Shoham, H., Aschengrau, D., Yackoubov, D., Frei, G., Rosenheimer G, N., Lerrer, B., Cohen, H.Y.,  
24 Nagler, A., Fibach, E., *et al.* (2012). Nicotinamide, a SIRT1 inhibitor, inhibits differentiation and facilitates  
25 expansion of hematopoietic progenitor cells with enhanced bone marrow homing and engraftment. *Exp Hematol*

1 40, 342-355.e341.

2 Pietras, E.M., Reynaud, D., Kang, Y.A., Carlin, D., Calero-Nieto, F.J., Leavitt, A.D., Stuart, J.M., Göttgens, B.,  
3 and Passegué, E. (2015). Functionally Distinct Subsets of Lineage-Biased Multipotent Progenitors Control  
4 Blood Production in Normal and Regenerative Conditions. *Cell Stem Cell* 17, 35-46.

5 Pineault, N., and Abu-Khader, A. (2015). Advances in umbilical cord blood stem cell expansion and clinical  
6 translation. *Exp Hematol* 43, 498-513.

7 Rollini, P., Kaiser, S., Faes-van't Hull, E., Kapp, U., and Leyvraz, S. (2004). Long-term expansion of  
8 transplantable human fetal liver hematopoietic stem cells. *Blood* 103, 1166-1170.

9 Rossmann, T., Schröder, B., Bug, G., Müller, P., Klenner, T., Knaus, R., Hoelzer, D., and Ottmann, O.G. (2001).  
10 Interleukin 3 improves the ex vivo expansion of primitive human cord blood progenitor cells and maintains the  
11 engraftment potential of scid repopulating cells. *Stem Cells* 19, 313-320.

12 Sanjuan-Pla, A., Macaulay, I.C., Jensen, C.T., Woll, P.S., Luis, T.C., Mead, A., Moore, S., Carella, C., Matsuoka,  
13 S., Bouriez Jones, T., *et al.* (2013). Platelet-biased stem cells reside at the apex of the haematopoietic stem-  
14 cell hierarchy. *Nature* 502, 232-236.

15 Schaefer, B.C., Schaefer, M.L., Kappler, J.W., Marrack, P., and Kiedl, R.M. (2001). Observation of antigen-  
16 dependent CD8+ T-cell/ dendritic cell interactions in vivo. *Cell Immunol* 214, 110-122.

17 Seita, J., Ema, H., Ooehara, J., Yamazaki, S., Tadokoro, Y., Yamasaki, A., Eto, K., Takaki, S., Takatsu, K., and  
18 Nakauchi, H. (2007). Lnk negatively regulates self-renewal of hematopoietic stem cells by modifying  
19 thrombopoietin-mediated signal transduction. *Proc Natl Acad Sci U S A* 104, 2349-2354.

20 Shima, H., Takubo, K., Iwasaki, H., Yoshihara, H., Gomei, Y., Hosokawa, K., Arai, F., Takahashi, T., and Suda,  
21 T. (2009). Reconstitution activity of hypoxic cultured human cord blood CD34-positive cells in NOG mice.  
22 *Biochem Biophys Res Commun* 378, 467-472.

23 Shimura, M., Shindou, H., Szyrwiel, L., Tokuoka, S.M., Hamano, F., Matsuyama, S., Okamoto, M., Matsunaga,  
24 A., Kita, Y., Ishizaka, Y., *et al.* (2016). Imaging of intracellular fatty acids by scanning X-ray fluorescence  
25 microscopy. *FASEB J* 30, 4149-4158.

- 1 Shivdasani, R.A., Mayer, E.L., and Orkin, S.H. (1995). Absence of blood formation in mice lacking the T-cell  
2 leukaemia oncoprotein tal-1/SCL. *Nature* 373, 432-434.
- 3 Sigurdsson, V., Takei, H., Soboleva, S., Radulovic, V., Galeev, R., Siva, K., Leeb-Lundberg, L.M., Iida, T., Nittono,  
4 H., and Miharada, K. (2016). Bile Acids Protect Expanding Hematopoietic Stem Cells from Unfolded Protein  
5 Stress in Fetal Liver. *Cell Stem Cell* 18, 522-532.
- 6 Solaimani Kartalaei, P., Yamada-Inagawa, T., Vink, C.S., de Pater, E., van der Linden, R., Marks-Bluth, J., van  
7 der Sloot, A., van den Hout, M., Yokomizo, T., van Schaick-Solernó, M.L., *et al.* (2015). Whole-transcriptome  
8 analysis of endothelial to hematopoietic stem cell transition reveals a requirement for Gpr56 in HSC generation.  
9 *J Exp Med* 212, 93-106.
- 10 Spector, A.A. (1975). Fatty acid binding to plasma albumin. *J Lipid Res* 16, 165-179.
- 11 Spencer, J.A., Ferraro, F., Roussakis, E., Klein, A., Wu, J., Runnels, J.M., Zaher, W., Mortensen, L.J., Alt, C.,  
12 Turcotte, R., *et al.* (2014). Direct measurement of local oxygen concentration in the bone marrow of live animals.  
13 *Nature* 508, 269-273.
- 14 Sun, J., Ramos, A., Chapman, B., Johnnidis, J.B., Le, L., Ho, Y.J., Klein, A., Hofmann, O., and Camargo, F.D.  
15 (2014). Clonal dynamics of native haematopoiesis. *Nature* 514, 322-327.
- 16 Takubo, K., Goda, N., Yamada, W., Iriuchishima, H., Ikeda, E., Kubota, Y., Shima, H., Johnson, R.S., Hirao, A.,  
17 Suematsu, M., *et al.* (2010). Regulation of the HIF-1alpha level is essential for hematopoietic stem cells. *Cell*  
18 *Stem Cell* 7, 391-402.
- 19 Takubo, K., Nagamatsu, G., Kobayashi, C.I., Nakamura-Ishizu, A., Kobayashi, H., Ikeda, E., Goda, N., Rahimi,  
20 Y., Johnson, R.S., Soga, T., *et al.* (2013). Regulation of glycolysis by Pdk functions as a metabolic checkpoint  
21 for cell cycle quiescence in hematopoietic stem cells. *Cell Stem Cell* 12, 49-61.
- 22 Taya, Y., Ota, Y., Wilkinson, A.C., Kanazawa, A., Watarai, H., Kasai, M., Nakauchi, H., and Yamazaki, S. (2016).  
23 Depleting dietary valine permits nonmyeloablative mouse hematopoietic stem cell transplantation. *Science* 354,  
24 1152-1155.
- 25 Trumpp, A., Essers, M., and Wilson, A. (2010). Awakening dormant haematopoietic stem cells. *Nat Rev*

- 1 Immunol 10, 201-209.
- 2 Wagner, J.E., Brunstein, C.G., Boitano, A.E., DeFor, T.E., McKenna, D., Sumstad, D., Blazar, B.R., Tolar, J., Le,  
3 C., Jones, J., *et al.* (2016). Phase I/II Trial of StemRegenin-1 Expanded Umbilical Cord Blood Hematopoietic  
4 Stem Cells Supports Testing as a Stand-Alone Graft. *Cell Stem Cell* 18, 144-155.
- 5 WASSERMAN, K., and MAYERSON, H.S. (1951). Exchange of albumin between plasma and lymph. *Am J*  
6 *Physiol* 165, 15-26.
- 7 Wilson, A., Laurenti, E., Oser, G., van der Wath, R.C., Blanco-Bose, W., Jaworski, M., Offner, S., Dunant, C.F.,  
8 Eshkind, L., Bockamp, E., *et al.* (2008). Hematopoietic stem cells reversibly switch from dormancy to self-  
9 renewal during homeostasis and repair. *Cell* 135, 1118-1129.
- 10 Yamaguchi, M., Hirayama, F., Kanai, M., Sato, N., Fukazawa, K., Yamashita, K., Sawada, K., Koike, T.,  
11 Kuwabara, M., Ikeda, H., *et al.* (2001). Serum-free coculture system for ex vivo expansion of human cord blood  
12 primitive progenitors and SCID mouse-reconstituting cells using human bone marrow primary stromal cells. *Exp*  
13 *Hematol* 29, 174-182.
- 14 Yoshihara, H., Arai, F., Hosokawa, K., Hagiwara, T., Takubo, K., Nakamura, Y., Gomei, Y., Iwasaki, H., Matsuoka,  
15 S., Miyamoto, K., *et al.* (2007). Thrombopoietin/MPL signaling regulates hematopoietic stem cell quiescence  
16 and interaction with the osteoblastic niche. *Cell Stem Cell* 1, 685-697.

17

18

1 **FIGURE TITLES AND LEGENDS**

2 **Figure 1. Serum-free culture induces fatty-acid dependence in HSCs**

3 **(A)** Schematic showing microarray analysis. Freshly isolated CD150<sup>+</sup>CD48<sup>-</sup>CD41<sup>-</sup>Flt3<sup>-</sup>CD34<sup>-</sup> LSK cells

4 (Fresh HSCs), and HSCs cultured 16 hours with (10% serum) or without (Serum-free) serum were

5 subjected to cDNA microarray analysis. Cytokines (SCF and TPO at 100ng/mL each) were

6 supplemented in each condition. n =1 for each condition.

7 **(B)** Scatter plot of cDNA microarray data comparing conditions indicated in **(A)**. Fatty acid or cholesterol

8 synthesis genes are highlighted in red. Correlation coefficient *r* is noted.

9 **(C)** Gene set enrichment analysis (GSEA) of cDNA microarray data of HSCs shown in **(A)**. FDR, false

10 discovery rate. NES, normalized enrichment score.

11 **(D)** Gene ontology analysis (GO) of HSCs indicated in **(A)**. Shown are GO terms of genes over-represented

12 in HSCs cultured in serum-free conditions.

13 **(E)** Schematic illustration of fatty acid biosynthetic and  $\beta$ -oxidation pathways, and their small molecule

14 inhibitors used here. Regulators related to fatty-acid biosynthesis are in blue and to  $\beta$ -oxidation are in

15 green. Arrows indicate enzymatic reactions and dotted arrows indicate transcriptional and post-

16 translational activation.

17 **(F)** Quantitative real-time PCR (qPCR) analysis of fatty acid-related mRNAs in fresh HSCs and HSCs

18 cultured 16 hours with or without 10% serum. Values are normalized to Gapdh expression and expressed

19 as fold-induction relative to levels in fresh HSCs (mean  $\pm$  SD, n = 4 technical replicates). \**P* < 0.05, \*\**P* <

1 0.01, \*\*\* $P < 0.001$ , by Tukey-Kramer multiple comparison test.

2 **(G)** Relative survival of cultured HSCs following treatment with indicated inhibitors. 100 HSCs were  
3 cultured 7 days in serum-free or 10% serum conditions. Cytokines (SCF and TPO at 100ng/mL each) were  
4 added to each culture. Data are normalized to vehicle control (mean  $\pm$  SD,  $n = 4$ ). \* $P < 0.05$  and \*\*\* $P <$   
5 0.001 by two-tailed Student's  $t$  test between Serum-free sample and serum conditions.

6

## 7 **Figure 2. Albumin is a source of fatty acid for HSCs**

8 **(A)** Representative intravital staining imaging of mouse calvarial bone marrow using multi-photon  
9 excitation microscopy to assess albumin permeability. Qdot-655 (red) was administered immediately prior  
10 to intravenous injection of FITC-labelled BSA (green, top panels) or FITC-labelled 150kDa dextran (green,  
11 bottom panels) to visualize vasculature. Images were acquired at indicated representative time points after  
12 BSA or dextran injection (Pre, prior to BSA or dextran injection). Blue indicates second harmonic  
13 generation overlapping with bone area.

14 **(B)** Mean fluorescent intensity (MFI) of the FITC-BSA (top) or FITC-150kDa dextran (bottom) signal in  
15 intra- and extra-vascular regions of calvarial bone marrow, based on microscopy analysis shown in **(A)**  
16 (mean  $\pm$  SD of 18 randomly chosen points for each indicated area from 3 mice from 3 independent  
17 experiments).

18 **(C)** qPCR analysis of fatty acid- or cholesterol-related mRNAs in CD150<sup>+</sup>CD41<sup>-</sup>CD48<sup>-</sup>Flt3<sup>-</sup>CD34<sup>-</sup> LSK cells  
19 cultured 16 hours with indicated reagents plus cytokines (SCF and TPO at 100ng/mL each). nBSA, native

1 bovine serum albumin. FA-free BSA: 4% w/v fatty acid-free BSA. Reconst BSA: 4% w/v fatty acid-free BSA  
2 reconstituted with sodium palmitate and sodium oleate at 200µg/mL. Values are normalized to Gapdh  
3 expression and expressed as fold-induction relative to levels in 10% serum (mean ± SD, n = 4 technical  
4 replicates). \**P* < 0.05, \*\**P* < 0.01, \*\*\**P* < 0.001. n.s., not significant by Tukey-Kramer multiple comparison  
5 test.

6 **(D)** Total cell number after 7 days of culture of 100 CD150<sup>+</sup>CD41<sup>-</sup>CD48<sup>-</sup>Flt3<sup>-</sup>CD34<sup>-</sup> LSK cells with or without  
7 10µM cerulenin (mean ± SD, n = 4). Media contained 0.1% or 4% (w/v) nBSA plus SCF and TPO at  
8 100ng/mL each. \*\*\**P* < 0.001. n.s., not significant by two-tailed Student's t test between DMSO control and  
9 Cerulenin.

10 **(E)** Relative total cell number after 7 days of culture of 100 CD150<sup>+</sup>CD41<sup>-</sup>CD48<sup>-</sup>Flt3<sup>-</sup>CD34<sup>-</sup> LSK cells with  
11 indicated fatty acid biosynthesis inhibitors under different culture conditions (mean ± SD, n = 4 from 1  
12 experiment). Cerulenin, 5µM; TOFA 1µM; A939572, 1µM; and Fatostatin, 20µM. Final DMSO  
13 concentration, 0.1% v/v. Data are normalized to cell numbers seen in DMSO controls. \**P* < 0.05, \*\**P* <  
14 0.01, and \*\*\**P* < 0.001. n.s., not significant compared with DMSO by Tukey-Kramer multiple comparison  
15 test.

16 **(F)** qPCR analysis of fatty acid or cholesterol-related mRNAs in CD150<sup>+</sup>CD41<sup>-</sup>CD48<sup>-</sup>Flt3<sup>-</sup>CD34<sup>-</sup> LSK cells  
17 cultured 16 hours with or without 20µM Fatostatin under indicated conditions. Indicated cultures were  
18 supplemented with SCF and TPO at 100ng/mL each. DMSO concentration, 0.1% v/v. nBSA, FA-free BSA,  
19 and Reconst BSA are defined as in **(C)**. Values were normalized to Gapdh expression and expressed as

1 fold-induction relative to levels detected seen in DMSO/10% serum sample (mean  $\pm$  SD, n = 4 technical  
2 replicates from 1 experiment). \* $P$  < 0.05, \*\* $P$  < 0.01, and \*\*\* $P$  < 0.001. n.s., not significant by two-tailed  
3 Student's t test, n.d. not detected.

4  
5 **Figure 3. Hypoxia and low cytokine conditions are essential for maintenance of phenotypic HSCs**

6 **(A-D)** Contour plots showing cell number or frequency after 7 days culture (input: 275-300 CD150<sup>+</sup>CD41<sup>-</sup>  
7 CD48<sup>-</sup>Flt3<sup>-</sup>CD34<sup>-</sup> LSK cells) in 1% or 20% O<sub>2</sub> conditions in 49 (7 x 7) different concentrations of SCF (0 to  
8 81 ng/mL) and/or TPO (0 to 62.5ng/mL). Total cell number **(A)**, megakaryocyte (forward scatter<sup>hi</sup>, CD150<sup>hi</sup>  
9 and CD41<sup>hi</sup>) number **(B)**, phenotypic HSC (CD150<sup>+</sup>CD48<sup>-</sup> LSK cells) frequency per total cells **(C)**, and  
10 absolute number of each LSK subfraction **(D)** are shown (n = 3 for each group from 3 independent  
11 experiments). In **(A)**, yellow dashed line demarcates the point at which cells remain quiescent (cell number  
12 ~300). In **(B)**, blue dashed line demarcates that point at which megakaryocyte number is ~10. In **(D)**, red  
13 dashed line demarcates the point at which the number of phenotypic HSCs is maintained (~100 cells).  
14 **(E)** Optimization of cytokine and oxygen conditions for HSC maintenance. Proliferation, megakaryocyte  
15 differentiation, and HSC maintenance borders (as indicated in **(A)**, **(B)**, and **(D)**, respectively) are merged,  
16 and intersection those borders observed in 1% O<sub>2</sub> is marked by "X". Note that proliferation and HSC  
17 maintenance borders differ in 20% O<sub>2</sub> conditions.  
18 **(F)** Representative images of HSCs cultured 7 days in either 1% O<sub>2</sub> with 3ng/mL SCF and 0.1ng/mL TPO,  
19 or with 20% O<sub>2</sub> with SCF and TPO at 100ng/mL each. Bars, 200 $\mu$ m.



1 (G) Representative plot of flow cytometry of HSCs cultured 7 days in 1% O<sub>2</sub> with 3ng/mL SCF and 0.1ng/mL  
2 TPO.

3  
4 **Figure 4. Hypoxia and low cytokine conditions are essential for maintenance of functional HSCs**

5 (A and B) EdU incorporation in HSCs cultured 16 hours under indicated cytokine and O<sub>2</sub> conditions. Cells  
6 were EdU-labeled for 2 hr (A) and analyzed by flow cytometry (mean ± SD, n = 4). Representative  
7 histograms show frequency of EdU-incorporated cells (B). \**P* < 0.05, \*\**P* < 0.01, and \*\*\**P* < 0.001. n.s.,  
8 not significant by Tukey-Kramer multiple comparison test.

9 (C) Apoptosis assay of HSCs cultured 5-days in indicated conditions. nBSA: 4% w/v native BSA. FA-free  
10 BSA: 4% w/v fatty acid-free BSA. Reconst. BSA: 4% w/v fatty acid-free BSA reconstituted with 200µg/mL  
11 each of sodium palmitate and sodium oleate (mean ± SD, n = 4). \**P* < 0.05, \*\**P* < 0.01, and \*\*\**P* < 0.001.  
12 n.s., not significant by Tukey-Kramer multiple comparison test.

13 (D-H) Bone marrow transplant (BMT) of freshly-isolated versus cultured HSCs. HSCs (CD150<sup>+</sup>CD48<sup>-</sup>  
14 CD41<sup>-</sup>Flt3<sup>-</sup>CD34<sup>-</sup> LSK cells) were sorted and cultured in SF-O3 with 3ng/mL SCF, 0.1ng/mL TPO, in 4%  
15 BSA in 1% O<sub>2</sub> conditions for 14 or 27 days. Then, 500 cultured cells (day 0-equivalent) or 500 freshly-  
16 isolated HSCs were transplanted into lethally-irradiated mice, and peripheral blood chimerism was  
17 determined. Experimental design (D). Peripheral blood chimerism of HSCs cultured 14 days and  
18 transplanted into primary or secondary recipients (mean ± SD, n = 6 per each group) (E). Bone marrow  
19 chimerism of donor-derived cells 4 months after primary BMT in (E) (n = 6 per group) (F). Peripheral blood

1 chimerism of HSCs cultured 27 days and transplanted into primary or secondary recipients (mean  $\pm$  SD,  
2  $n = 6$  per each group) (**G**). Bone marrow chimerism of donor-derived cells 4 months after primary BMT in  
3 (**G**) ( $n = 6$  per group) (**H**). \* $P < 0.05$ , \*\* $P < 0.01$ , and \*\*\* $P < 0.001$ . n.s., not significant by two-tailed Student's  
4 t test between Fresh and S3T0.1.

5

### 6 **Figure 5. Properties of fresh versus cultured HSCs**

7 (**A-C**) cDNA microarray analysis. (**A**) Schematic showing experimental design. Freshly isolated  
8 CD150<sup>+</sup>CD48<sup>-</sup>CD41<sup>-</sup>Flt3<sup>-</sup>CD34<sup>-</sup> LSK cells (Fresh HSCs), or HSCs cultured 7 days in 4% nBSA (nBSA) or  
9 in 4% FA-free BSA supplemented with 200 $\mu$ g/mL each of palmitate and oleate (Reconstituted BSA) under  
10 1% O<sub>2</sub> conditions were subjected to cDNA microarray analysis. Cytokines (3ng/mL SCF and 0.1ng/mL  
11 TPO) were added to each culture condition.  $n = 1$  for fresh HSCs,  $n = 1$  for 4% nBSA, and  $n = 2$  for  
12 reconstituted BSA samples.

13 (**B**) Scatter plot of cDNA microarray data comparing samples shown in (**A**). Fatty acid or cholesterol  
14 synthesis genes are highlighted in red. Correlation coefficient  $r$  is noted.

15 (**C**) Gene set enrichment analysis (GSEA) of cDNA microarray data shown in (**A**). FDR, false discovery  
16 rate. NES, normalized enrichment score.

17 (**D-G**) Single-cell qPCR analysis (sc-qPCR). (**D**) Experimental design. Freshly isolated CD150<sup>+</sup>CD48<sup>-</sup>  
18 CD41<sup>-</sup>Flt3<sup>-</sup>CD34<sup>-</sup> LSK cells (Fresh HSCs), or HSCs cultured 7 days in 4% nBSA were subjected to sc-  
19 qPCR analysis. Cytokines (3ng/mL SCF and 0.1ng/mL TPO) were added to the culture media. After data

1 filtering, 46 cells from the fresh HSC sample and 42 from the 4% nBSA sample remained. Data are from  
2  $n = 1$  experiment.

3 **(E)** Principal component analysis of sc-qPCR data. The first two principal components are shown.

4 **(F)** Violin plots showing expression levels of HSC-related genes.

5 **(G)** Correlation coefficient matrix with hierarchical clustering of differentially-expressed genes between  
6 fresh and nBSA samples. sc-qPCR data from both groups were included in the analysis.

7 **(H)** The effect of fatty acid or cholesterol supplementation on levels of differentially-expressed genes  
8 observed in either cDNA microarray or sc-qPCR was assessed by qPCR analysis of fresh and cultured  
9 HSCs. Freshly isolated CD150<sup>+</sup>CD48<sup>-</sup>Flt3<sup>-</sup> LSK cells (Fresh HSCs), or HSCs cultured 7 days with 4%  
10 nBSA supplemented with the fatty acid mixture at indicated concentrations with or without 20 $\mu$ g/mL  
11 cholesterol and 20 $\mu$ g/mL palmitoyl phosphatidylcholine. The fatty acid mixture was as defined in Figure  
12 2C and contained 3ng/mL SCF and 0.1ng/mL TPO. Shown are means  $\pm$  SD with  $n=4$  technical replicates  
13 from 1 experiment. P values were calculated by two-way ANOVA to test effects of fatty acid ( $P_{FA}$ ) and  
14 cholesterol ( $P_{chol}$ ). The Fresh sample was omitted from ANOVA.

15 **(I)** As in **(H)**, effects of insulin concentration on cholesterol on expression of indicated genes were  
16 examined by qPCR. Freshly isolated CD150<sup>+</sup>CD48<sup>-</sup>Flt3<sup>-</sup> LSK cells (Fresh HSCs), or HSCs cultured 7 days  
17 with 4% nBSA supplemented with the fatty acid mixture (as in **(I)**) at 1000 $\mu$ g/mL, with or without 20 $\mu$ g/mL  
18 cholesterol. Media contained 3ng/mL SCF and 0.1ng/mL TPO. Insulin was added at indicated  
19 concentrations. Shown are means $\pm$ SD with  $n=4$  technical replicates from 1 experiment. Indicated P values

1 were calculated by two-way ANOVA. The fresh sample and samples in which no signal was detected were  
2 omitted from ANOVA.

3

4 **Figure 6. Low cytokine and hypoxic conditions enhance HSC dependence on exogenous fatty**  
5 **acids**

6 **(A)** S6, ERK1/2, and STAT5 phosphorylation status in hematopoietic stem/progenitor fractions, as assessed  
7 by intracellular flow cytometry following exposure to SCF (0 to 81ng/mL) and/or TPO (0 to 121.5ng/mL).  
8 Dashed red line indicates the HSC maintenance border as shown in **Figure 3D**, and “X” marks 3ng/mL  
9 SCF and 0.1ng/mL TPO (n = 2 from 2 independent experiments for pS6, and 1 experiment for pERK1/2  
10 and for pSTAT5).

11 **(B)** HSC dependence on nBSA at low cytokine and hypoxic conditions. CD150<sup>+</sup>CD41<sup>-</sup>CD48<sup>-</sup>Flt3<sup>-</sup>CD34<sup>-</sup>  
12 LSK cells (250) were cultured 7 days in indicated conditions and either total cell number (top) or the number  
13 of CD150<sup>+</sup>CD48<sup>-</sup> LSK cells (bottom) was determined. All conditions contained 0.1ng/mL TPO (mean ± SD,  
14 n = 3). P values were calculated by two-way ANOVA to examine the influence of oxygen ( $P_{O_2}$ : 1% O<sub>2</sub> or  
15 20% O<sub>2</sub>) and nBSA ( $P_{BSA}$ : 0.1% BSA or 4% BSA).

16 **(C)** qPCR analysis of fatty acid (Scd1) and cholesterol (Pmvk) biosynthesis-related mRNAs after 16 hours  
17 of culture of CD150<sup>+</sup>CD41<sup>-</sup>CD48<sup>-</sup>Flt3<sup>-</sup>CD34<sup>-</sup> LSK cells at 3ng/mL (S3) or 100ng/mL (S100) SCF in the  
18 presence or absence of 4% nBSA. Values were normalized to Gapdh expression and are shown as fold-  
19 induction relative to levels detected in freshly isolated (Fresh) CD150<sup>+</sup>CD41<sup>-</sup>CD48<sup>-</sup>Flt3<sup>-</sup>CD34<sup>-</sup> LSK cells.

1 Culture medium was DMEM/F12 lacking TPO, insulin, sodium selenite, and transferrin (mean  $\pm$  SD, n = 4  
2 technical replicate). P values were calculated by two-way ANOVA to examine the influence of oxygen ( $P_{O_2}$ :  
3 1% O<sub>2</sub> or 20% O<sub>2</sub>) and SCF ( $P_{SCF}$ : S3 or S100).

4 **(D)** qPCR analysis as in **(C)** but in the presence of kinase inhibitors. Values were normalized to Gapdh  
5 and are expressed as fold-induction compared to levels detected in 3ng/mL SCF plus 4% nBSA in 20%  
6 O<sub>2</sub>. Culture medium was DMEM/F12 lacking TPO, insulin, sodium selenite, and transferrin (mean  $\pm$  SD, n  
7 = 4 technical replicates). AKTi, 1 $\mu$ M Triciribine. PI3Ki, 1 $\mu$ M PI-103. MEKi, 10 $\mu$ M MEK inhibitor I. JAKi, 1 $\mu$ M  
8 Jak inhibitor I. \* $P$  < 0.05, \*\* $P$  < 0.01, and \*\*\* $P$  < 0.001. n.s., not significant by Tukey-Kramer multiple  
9 comparison test.

10 **(E)** Total cell number (left) and the number of CD150<sup>+</sup>CD48<sup>-</sup> LSK cells (right) after 7 days culture of 300  
11 CD150<sup>+</sup>CD41<sup>-</sup>CD48<sup>-</sup>Flt3<sup>-</sup>CD34<sup>-</sup> LSK cells in either 4% FA-free BSA, 4% nBSA, or 4% reconstituted  
12 (200ug/mL each, sodium palmitate and sodium oleate) BSA under 1% O<sub>2</sub> conditions. Shown are means  $\pm$   
13 SD, with n = 4. P values were calculated by one-way ANOVA to examine the influence of BSA or fatty acid  
14 concentration.

15 **(F)** Total cell number (left) and the number of CD150<sup>+</sup>CD48<sup>-</sup> LSK cells (right) after 8 days of culture of 300  
16 CD150<sup>+</sup>CD41<sup>-</sup>CD48<sup>-</sup>Flt3<sup>-</sup>CD34<sup>-</sup> LSK cells with either 4% nBSA, 4% FA-free BSA, or 4% reconstituted BSA  
17 under 1% O<sub>2</sub> conditions in the presence of fatty acid synthesis inhibitors (5 $\mu$ M Cerulenin, 1 $\mu$ M TOFA, 1 $\mu$ M  
18 A939572, or 20 $\mu$ M Fatostatin) or a fatty acid oxidation inhibitor (10 $\mu$ M Etomoxir) (mean  $\pm$  SD, n = 4). \* $P$  <  
19 0.05, \*\* $P$  < 0.01, and \*\*\* $P$  < 0.001. n.s., not significant compared with DMSO samples among all BSA

1 samples, based on Tukey-Kramer multiple comparison test.

2

3 **Figure 7. Human HSCs require both fatty acid and cholesterol for maintenance**

4 **(A)** Contour plots of cell numbers after 7 days of culture (input: 600 CD34<sup>+</sup>CD38<sup>-</sup>CD90<sup>+</sup>CD45RA<sup>-</sup> cells  
5 from a human bone marrow CD34<sup>+</sup> sample) in SF-O3 + 4% nBSA and 1% O<sub>2</sub> in 49 (7 x 7) different  
6 concentrations of SCF (0 to 81 ng/mL) and/or TPO (0 to 62.5ng/mL). Top panels show total cell number  
7 (left) and absolute number of phenotypic HSCs (CD34<sup>+</sup>CD38<sup>-</sup>CD90<sup>+</sup>CD45RA<sup>-</sup> cells) (right). In bottom  
8 panels, surfaces predicted from data points observed in corresponding top panels are shown. (n = 3 wells  
9 per each condition from 1 experiment).

10 **(B)** Total cell number (left) and the number of CD34<sup>+</sup>CD38<sup>-</sup> cells after 1, 2, 3, or 4 weeks culture of 600  
11 CD34<sup>+</sup>CD38<sup>-</sup>CD90<sup>+</sup>CD45RA<sup>-</sup> cells with indicated cytokines. Medium was SF-O3 plus 4% nBSA, and cells  
12 were cultured in 1% O<sub>2</sub> (mean ± SD, n = 4 for each group).

13 **(C)** The effect of BSA and cytokine concentration on human HSCs. Cell number (total, CD34<sup>+</sup>CD38<sup>-</sup>, or  
14 CD34<sup>+</sup>CD38<sup>-</sup>CD90<sup>+</sup>CD45RA<sup>-</sup> cells) was determined after 7 days of culture of 600 CD34<sup>+</sup>CD38<sup>-</sup>  
15 CD90<sup>+</sup>CD45RA<sup>-</sup> cells. Medium was SF-O3 plus 4% nBSA and SCF and TPO at 3ng/mL each, and cells  
16 were cultured in 1% O<sub>2</sub> (mean ± SD, n = 4 for each group). \**P* < 0.05, \*\**P* < 0.01, and \*\*\**P* < 0.001. n.s.,  
17 not significant by Tukey-Kramer multiple comparison test.

18 **(D)** Effects of cholesterol and fatty acids on human HSCs. Cell number (total, CD34<sup>+</sup>CD38<sup>-</sup>, or CD34<sup>+</sup>CD38<sup>-</sup>  
19 CD90<sup>+</sup>CD45RA<sup>-</sup> cells) after 7 days of culture of 600 HSCs was determined. Medium was SF-O3 plus 4%

1 nBSA with or without either the fatty acid mixture (palmitate, oleate, linoleate, and stearate at a 4:3:2:1  
2 ratio) at indicated concentrations or 20µg/mL cholesterol. Cytokines were 3ng/mL SCF and 3ng/mL TPO.  
3 Cells were cultured in SF-O3 medium in 1% O<sub>2</sub> conditions (mean ± SD, n = 4 for each group). P values  
4 were calculated by two-way ANOVA to examine the influence of fatty acid and cholesterol.

5 **(E)** Gene expression in fresh or cultured human CD34<sup>+</sup>CD38<sup>-</sup>CD90<sup>+</sup>CD45RA<sup>-</sup> cells was examined by  
6 qPCR. Cells were cultured 40 hours in either SCF and TPO at 3ng/mL each (SCF3) or SCF and TPO at  
7 100ng/mL (S100) supplemented with either 4% FA-free BSA or 4% enhanced BSA (palmitate, oleate,  
8 linoleate, and stearate at a 4:3:2:1 ratio) and 20µg/mL cholesterol). Cells were cultured in αMEM (without  
9 exogenous insulin) in 1% O<sub>2</sub> conditions. Shown are means ± SD, n = 4 for each group. \**P* < 0.05, \*\**P* <  
10 0.01, and \*\*\**P* < 0.001. n.s., not significant by Tukey-Kramer multiple comparison test. ND, not detected.

11 **(F)** Experimental design for bone marrow transplant of either fresh or cultured human CD34<sup>+</sup>CD38<sup>-</sup>  
12 CD90<sup>+</sup>CD45RA<sup>-</sup> cells into irradiated (2.5Gy) immunocompromised mice. The latter were cultured for 15  
13 days in the presence of 4% FA-free BSA or 4% enhanced BSA (as defined in **(D)**) plus 20µg/mL cholesterol  
14 and SCF and TPO at 3ng/mL each. Cells were cultured in αMEM (lacking insulin) under 1% O<sub>2</sub> conditions.  
15 5000 cells (day 0-equivalent) were transplanted.

16 **(G)** Peripheral blood chimerism of human CD45<sup>+</sup> cells (mean + SD, n = 5 for Fresh; n = 6 for enhanced  
17 BSA; and n = 6 for FA-free BSA). \**P* < 0.05, and \*\**P* < 0.01. n.s., not significant, based on Wilcoxon's rank  
18 sum test.

19 **(H)** Composition of each lineage (Myeloid, B-cell, T-cell, and others) within hCD45<sup>+</sup> cells at indicated time

1 points after transplantation. Each bar represents data from individual recipients.

2



1 **Methods**

2 **CONTACT FOR REAGENT AND RESOURCE SHARING**

3 Further information and requests for resources and reagents should be directed to and will be fulfilled by  
4 the Lead Contact, Keiyo Takubo (keiyot@gmail.com)

5

6 **EXPERIMENTAL MODELS AND SUBJECT DETAILS**

7 **Mice**

8 C57BL/6J mice (8-14 week-old, purchased from SLC Japan or CLEA Japan) were used in all experiments,  
9 unless otherwise stated. C57BL/6-Ly5.1 congenic mice purchased from CLEA Japan were used for  
10 competitive repopulation assays. Ubc-GFP reporter mice (Schaefer et al., 2001) were purchased from The  
11 Jackson Laboratory and used as donors in reconstitution assays to examine platelet and red blood cell  
12 frequency. NOD/Shi-scid,IL-2R $\gamma$ KO Jic (NOG) mice were purchased from In-Vivo Science Inc. and used  
13 for human cell reconstitution assays. All mice were bred in the animal facility at the National Center for  
14 Global Health and Medicine under specific pathogen-free (SPF) conditions and fed ad-libitum. Mice were  
15 euthanized by cervical dislocation. Animal experiments were approved by the National Center for Global  
16 Health and Medicine. Both male and female mice were used in experiments.

17

18 **Human CD34<sup>+</sup> bone marrow cells**

19 Human CD34<sup>+</sup> bone marrow cells were purchased from Lonza and stored in liquid nitrogen until use.

1 Frozen cells were thawed in vials in a 37°C water bath and transferred to a 15mL tube. Medium (SF-O3  
2 or  $\alpha$ MEM or DMEM/F12) containing 10 % FCS plus 2U/mL DNaseI (Sigma Aldrich) was slowly added to  
3 the suspension while swirling gently to fill the tube. The suspension was centrifuged at 200 x g for 15  
4 minutes at room temperature. Supernatants were aspirated and the wash step repeated. An antibody  
5 cocktail (50 $\mu$ L of PBS + 2%FCS plus 10 $\mu$ L of anti-CD34-FITC, 2 $\mu$ L of anti-CD38-PerCP-Cy5.5, 5 $\mu$ L of anti-  
6 CD90-PE-Cy7, and 10 $\mu$ L of anti-CD45RA-PE) was added to the suspension and kept on ice for 30 minutes.  
7 Cells were washed once with PBS+2% FCS and resuspended in PBS+2%FCS with 0.1% PI. Cells were  
8 sorted into SF-O3 or  $\alpha$ MEM containing 4% BSA + 55 $\mu$ M 2-ME by FACSAria II.

9

## 10 **METHOD DETAILS**

### 11 **Cell preparation**

12 Mouse bone marrow cells were isolated from two femurs and tibiae. Femurs and tibiae were flushed with  
13 PBS+2% FCS using a 21-gauge needle (Terumo) and a 10mL syringe (Terumo) to collect the bone marrow  
14 plug. The plug was dispersed by refluxing through the needle and the suspension centrifuged 680 x g for  
15 5 minutes at 4°C. Cells were then lysed with lysis buffer (0.17M NH<sub>4</sub>Cl, 1mM EDTA, 10mM NaHCO<sub>3</sub>) at  
16 room temperature for 5 minutes, washed with 2 volumes PBS+2%FCS, and centrifuged at 680 x g for 5  
17 minutes at 4°C. Cells were resuspended in PBS + 2%FCS and filtered through 40 $\mu$ m nylon mesh (BD  
18 Biosciences). Cells were again centrifuged 680 x g for 5 minutes at 4°C and treated with anti-CD16/32  
19 antibody for Fc-receptor block (2 $\mu$ L/mouse) for 5 minutes at 4°C followed by addition of anti-c-Kit magnetic

1 beads (Miltenyi) at a 1/5 volume/volume ratio for 15 minutes at 4°C. After removing the antibody with two  
2 PBS+2%FCS washes, c-Kit-positive cells were isolated using Auto-MACS Pro (Miltenyi) using the Possel-  
3 S program. Isolated cells were once centrifuged 340 x *g* for 5 minutes and stained with antibodies for flow  
4 cytometry.

5

## 6 **Cell culture**

7 SF-O3 medium (Sanko Junyaku) is a mixture of RPMI1640, Dulbecco's MEM, and Ham's F-12 medium at  
8 a 2:1:1 ratio with added cytidine, glutathione, para-amino benzoic acid, and cholesterol (a formula  
9 suggested by Shin-ichi Nishikawa, personal communication) supplemented with recombinant-human  
10 insulin, recombinant-human transferrin, sodium selenite, ethanolamine, HEPES, and sodium bicarbonate  
11 2.2g/L. We further added 0.1% v/v of BSA by diluting a 10% BSA concentrate (Sanko Junyaku) or adding  
12 0.1% w/v BSA powder (Sigma Aldrich). Additional BSA powder or fatty-acid-free BSA (Sigma Aldrich) was  
13 directly dissolved in the medium at indicated concentrations and filtered using 0.22µm filter. 2-ME was  
14 added before filtration at final concentration of 55µM. SCF, TPO, and other cytokines or reagents were  
15 added to the filtered media.

16 For other culture media (αMEM or DMEM/F12 medium), we added human recombinant insulin (Nacalai  
17 Tesque) before filtration at indicated final concentrations. Sorted murine or human cells were centrifuged  
18 at 340 x *g* for 5 min and supernatants discarded. Media was added to dilute cells to the desired number of  
19 cells per well in 10µL, which was dispensed into 200µL of culture media. Culture conditions were either

1 1% O<sub>2</sub> + 5% CO<sub>2</sub> or 20% O<sub>2</sub> + 5% CO<sub>2</sub> at 37°C in appropriate humidified incubators. For seven-day cultures,  
2 medium remained unchanged. For longer periods (11-31 days), half of the medium was changed twice a  
3 week.

#### 5 **Bone marrow transplant**

6 For donor cells, HSCs (CD150<sup>+</sup> CD41<sup>-</sup> CD48<sup>-</sup> CD34<sup>-</sup> Flt3<sup>-</sup> LSKs) from C57BL/6-Ly5.2 mice or HSCs  
7 (CD150<sup>+</sup>CD41<sup>-</sup>CD48<sup>-</sup>Flt3<sup>-</sup> LSKs) from Ubc-GFP mice or cultured HSCs, together with 4 × 10<sup>5</sup> BMMNCs  
8 from untreated C57BL/6-Ly5.1 or Ly5.2 mice, were used. For recipients, C57BL/6-Ly5.1 or Ly5.2 congenic  
9 mice were used. Donor cells were transplanted retro-orbitally into recipients that had been lethally-  
10 irradiated (9.5Gy using MBR-1520R (Hitachi Power Solutions), 125kV 10mA, 0.5mm Al, 0.2mm Cu filter).  
11 At 1, 2, 3, and 4 months after BMT, peripheral blood was collected and the percentage of donor-derived  
12 cells and their differentiation status determined by MACSQuant. Forty to eighty µL of peripheral blood was  
13 sampled from the retro-orbital plexus using heparinized glass capillary tubes (Drummond Scientific) and  
14 was suspended in 1mL of PBS+heparin. For platelet and red blood cell (RBC) analysis, 5µL of blood  
15 suspension was mixed with 50µL staining solution (PBS + 2% FCS with Ter-119-PerCP-Cy5.5 (1:100), and  
16 anti-CD41-PE(1:100)) for 30 minutes at 4°C, washed once and analyzed by MACSQuant. For white blood  
17 cell analysis, the blood suspension was centrifuged at 340 x g for 3 minutes. The supernatant was  
18 discarded and the pellet was resuspended into 1mL of PBS + 1.2% w/v dextran (200kDa, Nacalai Tesque)  
19 for 45 minutes at room temperature. The supernatant then was centrifuged at 340 x g for 3 minutes, and

1 pellets were resuspended in 0.17M NH<sub>4</sub>Cl solution to lyse residual RBCs for 5 to 10 minutes until the  
2 suspension became clear. Cells were resuspended in 50μL PBS +2%FCS with 0.3μL Fc-block. Surface  
3 antigen staining was performed using the following antibody panel: Gr1-PE-Cy7, Mac-1-PE-Cy7, B220-  
4 APC, CD4-PerCP-Cy5.5, CD8a-PerCP-Cy5.5, CD45.1-PE, CD45.2-FITC. All antibodies were 0.3μL per  
5 sample. The frequency (%) of donor-derived cells was calculated as follows:  
6  $100 \times \text{Donor-derived (GFP}^+ \text{ or Ly5.2}^+\text{Ly5.1}^- \text{) cells (\%)} / (\text{Donor-derived cells (\%)} + \text{Competitor- or recipient-}$   
7  $\text{derived (Ly5.2}^-\text{Ly5.1}^+ \text{ or GFP}^- \text{) cells (\%)})$   
8 Myeloid cells, B cells, T cells, RBCs, and platelets were marked by Gr-1<sup>+</sup> or Mac-1<sup>+</sup>, B220<sup>+</sup>, CD4<sup>+</sup> or CD8<sup>+</sup>,  
9 CD41<sup>-</sup> Ter119<sup>+</sup>, and CD41<sup>+</sup> Ter119<sup>-</sup>, respectively. Total cell chimerism represents the frequency of donor-  
10 derived Ly5.2<sup>+</sup>Ly5.1<sup>-</sup> or GFP<sup>+</sup> cells over the frequency of Ly5.2<sup>-</sup>Ly5.1<sup>+</sup> or GFP<sup>-</sup> cells in mononuclear or  
11 unlysed cells. At 4 months after BMT, the frequency of donor-derived cells in bone marrow was determined  
12 using one femur and tibia per recipient. After counting bone marrow cells using an automated counter  
13 TC10 (Bio-Rad), equal volumes of cell suspensions (20-30% of total volume) from each recipient were  
14 pooled and  $2 \times 10^6$  of cells were resuspended in SF-O3 medium (0.1% BSA). The cell suspension  
15 (200μL/recipient) was transplanted by retro-orbital injection into lethally (9.5 Gy)-irradiated Ly5.1<sup>+</sup>  
16 recipients with a 1mL syringe and 27-gauge needle. Remaining cells were stained to assess bone marrow  
17 chimerism. Anti-CD150-BV421, anti-CD48-PE, anti-Flt3-APC, anti-lineage (CD4, CD8a, Gr-1, Mac-1, Ter-  
18 119, B220)-PerCP-Cy5.5, anti-c-Kit-APC-Cy7, anti-Sca-1-PE-Cy7, anti-Ly5.1-Alexa-Fluor700, and anti-  
19 Ly5.2-FITC were used for surface antigen detection. All antibodies were 1μL per sample.

1

## 2 **Bone marrow transplant of human HSCs into NOG mice**

3 A total of 5000 HSCs (CD34<sup>+</sup> CD38<sup>-</sup> CD90<sup>+</sup> CD45RA<sup>-</sup>) from frozen samples or the progeny of 5000 cultured  
4 HSCs (day 0 equivalent) were transplanted retro-orbitally into irradiated (2.5Gy) NOG mice. At 1, 2, and 3  
5 months after BMT, peripheral blood was collected and the percentage of human cells and their  
6 differentiation status were determined by MACSQuant. After cell preparation as described above, cells  
7 were resuspended in 50 $\mu$ L PBS +2%FCS with 0.3 $\mu$ L anti-mouse Fc-block. Surface antigen staining was  
8 performed using the following antibody panel: mouse CD45-PE-Cy7, mouse Ter-119-PE-Cy7, human  
9 CD45-BV421, human CD13-PE, human CD33-PE, human CD19-APC, human CD3-APC-Cy7.

10 Myeloid cells, B cells, or T cells were determined as human CD45<sup>+</sup> CD13/CD33<sup>+</sup>, human CD45<sup>+</sup> CD19<sup>+</sup>,  
11 or human CD45<sup>+</sup> CD3<sup>+</sup> respectively. Total cell chimerism represents the frequency of PI human CD45<sup>+</sup>  
12 murine CD45<sup>-</sup> Ter-119<sup>-</sup> cells over total PI<sup>-</sup> mononuclear cells.

13

## 14 **Fatty acid and cholesterol reconstitution**

15 Fatty acid sodium salt (a combination of palmitate, oleate, linoleate, and stearate) was dissolved in  
16 methanol to a concentration of 4-20mg/mL and cholesterol (Tokyo Chemical Industry Co., Ltd.) was  
17 separately dissolved in methanol to a concentration of 4mg/mL in glass tubes (Maruemu Corporation).  
18 Solutions were mixed in glass tubes, air-dried, and then heated on water-bath at 50°C until methanol had  
19 evaporated. Medium containing 4% w/v BSA was directly added to the tube and sonicated until lipids were

1 dissolved. Medium was then filtered using a 0.22 $\mu$ m filter (Millipore). 2-ME or insulin (if needed) was added  
2 just before filtration. Other reagents were added after filtration.

3

#### 4 **BSA**

5 We used four types of BSA in culture media: native BSA (nBSA, Sigma Aldrich), fatty-acid-free BSA (FA-  
6 free BSA, Sigma Aldrich), FA-free BSA reconstituted with fatty acids (reconstituted BSA), and nBSA  
7 reconstituted with fatty acids and cholesterol (enhanced BSA). Fatty acid stock solutions used for  
8 reconstituted BSA were either 1:1 sodium palmitate and sodium oleate or 4:3:2:1 sodium palmitate, sodium  
9 oleate, sodium linoleate, and sodium stearate. Fatty acids used for enhanced BSA were 4:3:2:1 sodium  
10 palmitate, oleate, linoleate, and stearate. In that case, the final concentration of fatty acids was 400 $\mu$ g/mL  
11 and of cholesterol was 20 $\mu$ g/mL.

12

#### 13 **Apoptosis analysis**

14 Cultured HSCs were stained using an Annexin V-PE Apoptosis Detection Kit (BD Biosciences), according  
15 to the manufacturer's instructions. Cells were resuspended in 250 $\mu$ L of PBS+2%FCS +0.1%PI, and  
16 apoptotic cells (Annexin V<sup>+</sup> PI<sup>-</sup> cells) were detected by MACSQuant.

17

#### 18 **EdU incorporation assay**

19 Cells were cultured 16 hours under indicated conditions, and 10mM EdU was then added to culture

1 medium to a final concentration of 10 $\mu$ M and incubated at 37°C for 2 hours. Cells were permeabilized to  
2 detect intracellular EdU using a Click-iT EdU Alexa Fluor 647 Flow Cytometry Assay Kit (Thermo Fisher  
3 Scientific) and analyzed by MACSQuant (Miltenyi Biotec).

#### 5 **Intracellular flow cytometry for phosphorylated ERK1/2, S6, and STAT5**

6 Murine BMMNCs were pooled from 4 mice per experiment. Cells were treated with 8 $\mu$ L (1:50) of Fc block  
7 for 10 minutes at 4°C. Since antigenicity of CD150 and Sca-1 is vulnerable to the fixation/permeabilization  
8 process, these markers were stained in advance. Cells were stained with 8 $\mu$ L (1:50) of CD150-BV421  
9 antibody and 8 $\mu$ L (1:50) of Sca-1-Alexa700 antibody at 4°C for 30 minutes and then washed once in PBS  
10 + 2% FCS and resuspended in DMEM/F12 medium at 4 x10<sup>7</sup>cells/mL. 50 $\mu$ L of cell suspension was  
11 dispensed to each well of 96-well round bottom plates followed by addition of 50 $\mu$ L DMEM/F12 containing  
12 2x concentrations of cytokines. Plates were incubated at 37°C, 5%CO<sub>2</sub>, and 20% O<sub>2</sub> conditions for  
13 indicated times. Cells were then fixed for 10 minutes at 37°C by adding 100 $\mu$ L of Fixation buffer I (BD  
14 Biosciences, PBS with 4% paraformaldehyde) and then chilled immediately by transferring to ice-cold 1mL  
15 of PBS/2% FCS. Cells were centrifuged (600 x g for 3 minutes) and then permeabilized by addition of  
16 500 $\mu$ L of ice-cold 90% methanol followed by incubation on ice for 30 minutes. After washing twice with  
17 1mL PBS + 2% FCS (staining solution), cells were resuspended in 50 $\mu$ L staining solution containing anti-  
18 lineage marker (CD4, CD8a, B220, Ter-119, Gr-1, Mac-1)-PerCP-Cy5.5 (1:100), anti-c-Kit-APC-Cy7  
19 (1:100), anti-CD48-PE (1:100), and either anti-phospho-ERK1/2-AlexaFluor488 antibody (1:5), or anti-



1 phospho-AKT-AlexaFluor488 antibodies (1:5), or anti-phospho-STAT5-AlexaFluor488 antibody (1:5) for 1  
2 hour at room temperature. Stained cells were washed once with 1mL staining medium and then  
3 resuspended in 250 $\mu$ L staining medium, and the samples were acquired by FACSAria II. Data were  
4 analyzed using FlowJo software.

5

### 6 **Single-cell qPCR analysis**

7 Fresh CD150<sup>+</sup>CD48<sup>-</sup>CD41<sup>-</sup>Fli3<sup>-</sup>CD34<sup>-</sup> LSK cells (HSCs) from 10 mice were sorted into 500 $\mu$ L SF-O3  
8 containing 4% w/v BSA +2-ME. 33000 HSCs were split into 2 tubes, one (fresh HSCs) subjected to reverse  
9 transcription and preamplification using Fluidigm C1 system (Fluidigm) and the other cultured 7 days in 2  
10 wells of a 96-well round-bottom plate (cultured HSCs) followed by reverse transcription and  
11 preamplification. SF-O3 containing 4% w/v BSA + 55 $\mu$ M 2-ME with SCF 3ng/mL plus TPO 0.1ng/mL was  
12 used for culture medium. Reverse transcription and pre-amplification was performed according to the  
13 manufacturer's instruction using an Ambion Single Cell-to-CT kit (Thermo Fisher Scientific) and TaqMan  
14 PCR probes (Thermo Fisher Scientific). Cells were diluted in Suspension Reagent (Fluidigm) to ~1000  
15 cells/ $\mu$ L and loaded to C1-Single-Cell Auto Prep IFC for Preamp (5-10 $\mu$ m). After loading cells, IFC was  
16 observed microscopically to ensure that single cells were captured in each well using IN Cell Analyzer  
17 6000 (GE Healthcare). Wells with 0 or >1 or shrunken cells were excluded. A total of 80 wells of 96 for  
18 fresh HSCs, and 62 of 96 wells for cultured HSCs were regarded as valid. Thermal cycling conditions in  
19 reverse transcription, and preamplification were as follows: 25°C for 10min, 42°C for 1hr, and 85°C for 5

1 min for reverse transcription, and 95°C for 10min, 18 cycles of 95°C for 15s and 60°C for 4min, and kept  
2 4°C until harvest. Amplified cDNA (about 3.5µL) from each sample was diluted with 25µL C1 DNA Dilution  
3 Reagent (Fluidigm) and frozen at -30°C until use. 48 samples of cultured or Fresh HSCs were subjected  
4 to qPCR. For single-cell qPCR analysis, a Biomark system (Fluidigm) in combination with Fluidigm 96.96  
5 Dynamic Array IFC was used. For assay mix, 2.5µL of TaqMan Gene Expression Assay (Thermo Fisher  
6 Scientific) and 2.5µL of Assay Loading Reagent (Fluidigm) were mixed for each gene. For the sample mix,  
7 2.5µL of TaqMan Fast Universal PCR Master Mix (Thermo Fisher Scientific), 0.25µL of GE Sample Loading  
8 Reagent (Fluidigm), and 2.25µL of cDNA were mixed. Assay and sample mixes were loaded onto 96.96  
9 Dynamic Array IFC, and PCR analysis was performed on BioMarkHD.

10

## 11 **Flow cytometry and cell sorting**

12 After selection of c-Kit<sup>+</sup> cells using magnetic beads, the murine hematopoietic stem and progenitor fraction  
13 was labeled as follows. For staining of C57BL/6J mice, lineage marker (CD4, CD8a, Gr-1, Mac-1, Ter-119,  
14 B220)-PerCP-Cy5.5, c-Kit-APC-Cy7, Sca-1-PE-Cy7, CD150-PE, CD41-FITC, CD48-FITC, Flt3-APC,  
15 CD34-BV421 were used. For staining of Ubc-GFP mice, lineage marker (CD4, CD8a, Gr-1, Mac-1, Ter-  
16 119, B220)-PerCP-Cy5.5, c-Kit-APC-Cy7, Sca-1-PE-Cy7, CD150-BV421, CD41-PE, CD48-PE, Flt3-APC  
17 were used. All antibodies used were 0.5µL per mouse. Cells were resuspended in 0.5 to 2mL of PBS  
18 +2%FCS + 0.1%PI and sorted by FACS Aria II into SF-O3 containing 4% w/v BSA or other medium (αMEM  
19 or DMEM/F12) with 4% w/v BSA. For murine cell experiments, when cultures were conducted in fatty-acid-

1 free conditions, fatty-acid-free BSA was used for sorting medium. For human cell experiments, fatty-acid  
2 free BSA was not used for sorting medium due to low cell survival rate. Murine HSCs were defined as  
3 CD150<sup>+</sup>CD41<sup>-</sup>CD48<sup>-</sup>CD34<sup>-</sup>Flt3<sup>-</sup>LSK or CD150<sup>+</sup>CD41<sup>-</sup>CD48<sup>-</sup>LSK (Kiel et al., 2005) or CD150<sup>+</sup>CD48<sup>-</sup>LSK  
4 cells. Multipotent progenitors (MPPs) were subfractionated as MPP1s (CD150<sup>-</sup>CD41<sup>-</sup>CD48<sup>-</sup>Flt3<sup>-</sup>LSK),  
5 MPP2s (CD150<sup>+</sup>CD41<sup>-</sup>/CD48<sup>+</sup>Flt3<sup>-</sup>LSK), MPP3s (CD150<sup>-</sup>CD41<sup>-</sup>/CD48<sup>+</sup>Flt3<sup>-</sup> LSK), or MPP4s (Flt3<sup>+</sup>LSK).  
6 Human HSCs were defined as CD34<sup>+</sup>CD38<sup>-</sup>CD90<sup>+</sup>CD45RA<sup>-</sup>. Data were analyzed using FlowJo™ software  
7 (Tree Star Inc.).

8

## 9 **Intravital Imaging of BSA**

10 Male mice (24–31g, 11–13 weeks old, non-fasting) were anesthetized via intraperitoneal injection of  
11 urethane (800mg/kg) and  $\alpha$ -chloralose (80mg/kg), tracheotomized, and intubated with a handmade Y-  
12 shaped tube for mechanical ventilation. Animals were mechanically ventilated with a small-animal  
13 ventilator (MiniVent type 845, Harvard Apparatus) with 21% O<sub>2</sub> at a tidal volume of 8 $\mu$ L/g and a respiratory  
14 rate of 120 breaths/min. The left femoral artery and vein were cannulated to monitor mean arterial pressure  
15 (MAP) and intravenous chemical administration, respectively. An arterial catheter connected to a pressure  
16 transducer (MP 150, BioPac Systems) was placed in the left femoral artery to continuously monitor MAP  
17 and heart rate. Rectal temperature was maintained at 37.0  $\pm$  0.5 °C throughout the experiment using a  
18 heating pad (ATC-2000, World Precision Instruments). The head of each mouse was fixed in a stereotactic  
19 frame (SG-4 N, Narishige Scientific Instrument Lab) in the sphinx position. The skull bone was exposed

1 by a midline skin incision. Images were acquired using a two-photon laser microscope (FV1000MPE,  
2 Olympus) attached to a mode-locked titanium-sapphire laser system (Chameleon Vision II, Coherent) that  
3 could achieve a 140-fs pulse width and an 80-MHz repetition rate. To visualize the bone marrow  
4 microvasculature, 500 kDa TRITC-dextran (0.2g/kg body weight, Merck) was injected. FITC-albumin  
5 (40mg/kg body weight, Merck) was administered intravenously to assess vascular leakage of albumin.  
6 FITC-albumin intensity was measured using Fluoview software (version FV10-ASW, Olympus).

7

#### 8 **Measurement of albumin in murine BM and serum**

9 Forty to eighty  $\mu\text{L}$  of peripheral blood was sampled from the retro-orbital plexus of mice using heparinized  
10 glass capillary tubes (Drummond Scientific) and collected into BD Microtainer blood collection tubes (BD  
11 Biosciences). For BM extracellular fluid collection, one femur and one tibia were placed on the filter  
12 membrane of 10 $\mu\text{L}$  Barrier Pipette Tips (Sorrenson BioScience). The tip was cut to a 5mm and then placed  
13 in a 1.5mL tube and centrifuged 15000g for 2 minutes. Each 0.5 $\mu\text{L}$  of serum or BM extracellular fluid was  
14 diluted at 1:40000, 1:160000, and 1:640000 in PBS and analyzed using a mouse Albumin ELISA Kit  
15 (Abcam), according to the manufacturer's instruction. Data from the 1:160000 dilution sample was  
16 considered valid as values were within the range of the calibration curve.

17

18 The serum was subjected to an ELISA using a Quantikine ELISA Kit (R&D Systems)

19

1 **Measurement of fatty acid content of BSA**

2 Fatty acid measurement was performed as described (Shimura et al., 2016). All fatty acids in 10mg  
3 samples of lyophilized native BSA (nBSA) or fatty-acid-free (FA-free) BSA were first derivatized to fatty  
4 acid methyl esters (FAMEs) using a FAME derivatization and purification kit (Nacalai Tesque), according  
5 to the manufacturer's instructions. C23:0 (Supelco n-Tricosanoic acid, Sigma–Aldrich) was added to BSA  
6 samples prior to methylation as an internal standard. FAMEs were analyzed by a gas chromatograph with  
7 electron impact mass spectrometry (GCMS-QP2010 Ultra (Shimadzu), using a FAMEWAX capillary  
8 column (30 m × 0.25 mm I.D. × 0.25 µm) (Restek Corporation). The injection port temperature was set at  
9 250°C. A 2-µl aliquot was injected in splitless mode. Column temperature was programmed as follows:  
10 initial temperature was held at 40°C for 2 min; increased at 20 to 140°C/min, 11 to 200°C/min, and 3°C to  
11 240°C/min. It was then maintained at 240°C for 10 min. Helium served as carrier gas with a linear velocity  
12 of 45 cm/s. FAMEs were detected in the selected ion monitoring mode of the characteristic fragment ions  
13 (m/z 55, 67, 74, and 79) and quantified using peak areas of known amounts of FAMEs (Supelco 37  
14 Component FAME Mix, Sigma–Aldrich) and C23:0 FAME.

15

16

17

18 **MACSQuant analysis of cell number**

19 Most (170µL) of the medium in wells of a 96-well plate was aspirated and samples were stained with 10µL

1 of antibody cocktail for 30 minutes at 4°C. For murine experiments, antibodies used were anti-lineage  
2 markers (CD4, CD8a, Gr-1, Mac-1, B220, Ter-119)-PerCP-Cy5.5, anti-c-Kit-APC-Cy7, anti-Sca-1-PE-Cy7,  
3 anti-CD150-PE, anti-CD48-FITC, anti-CD41-APC. All antibodies used were 0.1µL/well. For human  
4 experiments, anti-CD34-FITC (0.5µL/well), anti-CD38-PerCP-Cy5.5 (0.1µL/well), anti-CD90-PE-Cy7  
5 (0.25µL/well), and anti-CD45RA-PE (0.5µL/well) were used per well. After incubation, 100µL of PBS +  
6 2%FCS was added to wells, and the plates were centrifuged 5 minutes at 4°C at 400g with low acceleration  
7 and medium deceleration. 100µL supernatant was aspirated and the cell pellet was resuspended in 200µL  
8 PBS+2%FCS + 0.1% PI + 0.25% Flow-Check Fluorspheres (Beckman Coulter). Samples were acquired  
9 in fast mode, and volumes of 100µL (for large colonies) or 150-170µL (for small colonies) were analyzed.  
10 Data were exported as FCS files and analyzed using FlowJo software. Cell number was corrected by bead  
11 count of Flow-Check (~1000/µL). Megakaryocytes were identified as cells with high forward scatter and  
12 side scatter, as well as high CD150 and CD41 expression.

13

#### 14 **cDNA synthesis and quantitative RT-PCR**

15 Approximately 7000-15000 fresh or cultured cells per condition were subjected to RNA extraction using an  
16 RNA-easy mini kit (QIAGEN). cDNA was synthesized using SuperScript VILO (Thermo Scientific  
17 Technology) in a final volume of 20µL, according to the manufacturer's instruction.  
18 qPCR was performed using SYBR Premix ExTaq™ IIa (TaKaRa Bio) according to manufacturer's  
19 instruction. A mixture of 45µL SYBR Premix, 0.36µL each of forward and reverse primers, 1.8µL of Rox II

1 dye, 41.48 $\mu$ L of distilled water, and 1 $\mu$ L of cDNA solution was established and 20 $\mu$ L was dispensed to each  
2 of 4 wells of an assay plate. PCR analysis was performed using an ABI 7500 Fast Real-Time PCR System  
3 (Applied Biosystems) under the following conditions: 95°C for 10s followed by 40 cycles of 95°C for 5s and  
4 60°C for 34s. Expression levels were determined as  $2^{-(\text{Ct value} - \text{mean Ct value of GAPDH})}$  and were  
5 normalized to control samples, unless otherwise stated.

6

### 7 **cDNA microarray analysis**

8 CD150<sup>+</sup>CD41<sup>-</sup>CD48<sup>-</sup>CD34<sup>-</sup>Flt3<sup>-</sup>LSK cells of pooled bone marrow from 10 (for 7-day cultures) or 20 (for 16-  
9 hour cultures) mice were sorted into SF-O3 medium and then and either lysed for the fresh sample or  
10 cultured. Cultured cells were centrifuged at 340 x g for 5 min at 4°C and lysed with 75 $\mu$ L RLT buffer +  
11 0.75 $\mu$ L 2-ME. RNA extraction, cDNA synthesis, microarray analysis, and data normalization were  
12 outsourced to DNA Chip Research Inc. RNA was extracted using an RNeasy micro kit (QIAGEN). cDNA  
13 was synthesized and amplified from 2ng of extracted RNA using a WT-Ovation Pico RNA Amplification  
14 System (NuGen). Amplified cDNA was labelled using a Genomic DNA Enzymatic Labeling Kit (Agilent),  
15 followed by hybridization to the gene chip Mouse 8x60k (Agilent) using a Gene Expression Hybridization  
16 Kit (Agilent) and Gene Expression Wash Pack (Agilent).

17

## 18 **QUANTIFICATION AND STATISTICAL ANALYSIS**

### 19 **Statistical analysis**

1 Data are presented as means  $\pm$  SD, unless otherwise stated. For multiple comparisons, statistical  
2 significance was determined by Tukey's multiple comparison test using the Tukey HSD function or one-  
3 way or two-way ANOVA using the anova and the aov function of R software. An unpaired two-tailed  
4 Student's t test was used for experiments with two groups. In some transplantation assays with high  
5 variation, the Wilcoxon rank sum test was calculated using the wilcox.eact function of R software. False  
6 discovery rate (FDR) was calculated using the qvalue function of the qvalue package from Bioconductor  
7 (<http://www.bioconductor.org>).

8

### 9 **cDNA microarray analysis**

10 Scanning data and normalization were performed by DNA Chip Research Inc. The hybridized gene chip  
11 was scanned using DNA MicroArray Scanner (Agilent), and scanned images were analyzed with Feature  
12 Extraction Ver.9.5.3 (Agilent). Normalization was performed using GeneSpring software (Agilent). Raw  
13 data were first transformed to  $\log_2$  scale with expression levels  $<1.0$  set to 1.0. Gene expression levels  
14 across samples were normalized using the 75 percentile shift algorithm. Visualization of scatter plots of  
15 normalized expression with gene name annotation was performed using the ggplot2 package of R software.  
16 Genes with a  $\log_2$  fold difference in expression of  $>1.5$  were shown in dark blue, and genes of interest (i.e.  
17 fatty-acid-related genes) were in red. Genes with a "Not detected" flag were removed from the scatter plot.

18

### 19 **Gene ontology analysis**



1 Gene ontology (GO) analysis was performed using GeneSpring software (Agilent) for differentially  
2 expressed genes (DEG) between 2 samples. DEG was determined as genes with a fold difference of  
3 expression >2.0 between 2 samples.

## 5 **GSEA**

6 Normalized expression data were assessed using GSEA v2.0.13 software (Broad Institute). Gene sets  
7 were obtained from the Molecular Signatures Database v4.0 distributed at the GSEA website  
8 (<http://www.broadinstitute.org/gsea/msigdb/index.jsp>). The number of permutations was set to 1000. Gene  
9 sets with a nominal p-value < 0.05 and a false discovery rate q-value < 0.25 were considered statistically  
10 significant.

## 12 **Ingenuity pathway analysis**

13 Ingenuity pathway analysis (QIAGEN) was performed using microarray data from fresh HSCs in serum-  
14 free conditions (16 hours). The top 200 differentially-expressed genes were analyzed, and significantly  
15 enriched canonical pathways or upstream regulators in serum-free conditions were listed.

## 17 **Estimation of doubling time**

18 Doubling time in **Figure S4S** was estimated using following formula:

19  $7 / \log_2 ( (\text{Mean of total cell count}) / (\text{Input cell number}) )$

1 Upper estimate was:

$$2 \quad 7 / \log_2 \left( \frac{\text{Mean of total cell count} - \text{SD}}{\text{Input cell number}} \right)$$

3 Lower estimate was:

$$4 \quad 7 / \log_2 \left( \frac{\text{Mean of total cell count} + \text{SD}}{\text{Input cell number}} \right)$$

5 When  $(\text{Mean} - \text{SD}) / \text{Input} < 1$ , the result was denoted as NA.

6

## 7 **Single cell qPCR analysis**

8 Data were analyzed using Biomark qPCR analysis software (Fluidigm). Melting curves showing low quality  
9 (Quality threshold  $< 0.65$ ) and a Peak Ratio Threshold of  $< 0.8$  were interpreted as not detected. The  
10 baseline was corrected by linear correction. Data were exported to a .csv file and downstream analysis  
11 was performed using R software. Cells lacking expression of Gapdh, Hprt1 or Actb were excluded, leaving  
12 46 of 48 fresh cultures and 42 of 48 cultured HSCs. Genes not expressed in any cell (such as Cdkn2a,  
13 Cdkn2b, Csf1r, and Il7ra) were also excluded from analysis, leaving 92 of 96 genes. For each sample, Ct  
14 values were normalized to expression levels of housekeeping genes by subtracting average Ct values of  
15 Actb and Gapdh (normalized Ct values were designated  $\Delta\text{Ct}$  values).  $\Delta\text{Ct}$  values for not detected genes  
16 were set to the maximum  $\Delta\text{Ct}$  value of each gene + 3.5. For principal component analysis, the prcomp  
17 function implemented in R software was used on  $\Delta\text{Ct}$  values. Housekeeping genes (Actb, Gapdh, and  
18 Hprt1) were removed prior to analysis. Data scaling was not applied. The first 2 principal components were  
19 used to generate the plot. Hierarchical clustering with Euclidean distance and complete linkage clustering

1 was performed on the correlation coefficient matrix of selected genes calculated by the cor function with  
2 Pearson's correlation coefficient. Genes with a p-value <0.05 (calculated from  $\Delta$ Ct values using the t.test  
3 function) between fresh and cultured HSCs were selected for the cluster analysis. Hierarchical clustering  
4 was performed using the hclust package and the heatmap.2 function from the gplots package. All figures,  
5 including violin plots of  $\Delta$ Ct values, PCA plots, and hierarchical clustering, were visualized using the  
6 ggplot2 package. For visualization of expression levels in violin plots, the maximum  $\Delta$ Ct of each gene +  
7 3.5 –  $\Delta$ Ct was shown, setting expression levels of not detected genes to zero. The false-discovery rate of  
8 differences between expression levels in fresh versus cultured cells was calculated using the qvalue  
9 function in the qvalue package after creating a list of p-values for each gene using the t.test function.

10

### 11 **Generation of 2D and 3D plots for cytokine response**

12 Cell number or fold-change of phosphoproteins under various cytokine conditions was visualized followed  
13 by smoothing using R software, so that the global landscape of HSC behavior in the cytokine concentration  
14 space is readily recognized. Local regression was performed to fit a polynomial surface to data points  
15 using the loess function with parameters set as, degree = 2, and span = 0.25. X-, and Y- axes were  
16 expanded from 7 x 7 matrix to a 61 x 61 matrix, and data prediction was performed using the predict  
17 function. When data were log scale (as in total cell number or megakaryocyte number), the raw data value  
18 was increased by 1 to bring the data point above 0. 2D contour plots were generated using the ggplot2  
19 package, and 3D plots were generated using the rgl package.

1

2 **DATA AND SOFTWARE AVAILABILITY**

3 cDNA microarray data generated here are accessible in the GEO database under the accession number

4 GSE117515 and GSE117516. All software packages and methods used in this study have been properly

5 detailed and referenced under “QUANTIFICATION AND STATISTICAL ANALYSIS”.

6

7

8

9

1 **SUPPLEMENTAL FIGURE LEGENDS**

2 **Figure S1, related to Figure 1.**

3 **(A)** Heat map showing expression levels of fatty acid and cholesterol biosynthesis genes based on cDNA  
4 microarray analysis. Freshly isolated CD150<sup>+</sup>CD48<sup>-</sup>CD41<sup>-</sup>Flt3<sup>-</sup>CD34<sup>-</sup> LSK cells (Fresh HSC), HSCs  
5 cultured 16 hours with (10% serum) or without (Serum-free) serum were subjected to cDNA microarray  
6 analysis in **Figure 1A**. Cytokines (SCF and TPO at 100ng/mL each) were supplemented in each  
7 condition.

8 **(B)** Gene set enrichment analysis (GSEA) of cDNA microarray data of fresh HSCs and HSCs cultured 16  
9 hours with or without 10% serum. FDR, false discovery rate. NES, normalized enrichment score.

10 **(C)** Canonical pathways over-represented in serum-free culture based on Ingenuity Pathway Analysis  
11 (IPA) using cDNA microarray data in **Figure 1A**.

12 **(D)** Upstream regulators over-represented in serum-free culture based on Ingenuity Pathway Analysis  
13 (IPA) using cDNA microarray data.

14

15 **Figure S2, related to Figure 2.**

16 **(A)** Albumin concentration of murine serum and bone marrow extracellular fluid measured by ELISA (mean  
17  $\pm$  SD , n =3 from 3 mice).

18 **(B)** Lipidomic identification of BSA binding to fatty acid. Experimental design (left) and FA composition of  
19 crystallized native BSA (Lots #1 and #2), and FA-free BSA, as measured by gas chromatography/mass

1 spectrometry (GC-MS) (right, n =3 per each condition).

2 **(C)** After culturing either 100 CD150<sup>+</sup>CD48<sup>-</sup>CD41<sup>-</sup>Flt3<sup>-</sup>CD34<sup>-</sup> LSK cells (HSCs) or CD150<sup>-</sup>CD48/CD41<sup>+</sup>

3 LSK cells (MPP3/4) for 7 days, we determined the total number of cells in indicated conditions in SF-O3

4 with SCF and TPO at 100ng/mL each (mean ± SD, n = 4). \**P* < 0.05, \*\**P* < 0.01, and \*\*\**P* < 0.001. n.s.,

5 not significant among each of HSC or MPP by Tukey-Kramer multiple comparison test.

6 **(D)** qPCR analysis of Srebf1 and Srebf2 mRNAs in CD150<sup>+</sup>CD41<sup>-</sup>CD48<sup>-</sup>Flt3<sup>-</sup>CD34<sup>-</sup> LSK cells cultured for

7 16 hours. Indicated cultures were supplemented with SCF and TPO at 100ng/mL each. nBSA, native

8 bovine serum albumin; FA-free BSA, 1% w/v fatty-acid-free BSA. Values were normalized to Gapdh

9 expression and expressed as fold-induction compared to levels detected in 10% serum (mean ± SD, n =

10 4 technical replicate). \**P* < 0.05, and \*\*\**P* < 0.001. n.s., not significant by Tukey-Kramer multiple

11 comparison test.

12 **(E)** qPCR analysis of fatty acid- or cholesterol-related mRNAs of MPP fractions cultured 16 hours. Cultures

13 contained SCF and TPO at 100ng/mL each. nBSA, native bovine serum albumin. FA-free BSA: 1% w/v

14 fatty-acid-free BSA. Values were normalized as above and expressed as fold-induction compared to levels

15 detected in 10% serum (mean ± SD, n = 4 technical replicate). \**P* < 0.05, \*\**P* < 0.01, and \*\*\**P* < 0.001.

16 n.s., not significant by Tukey-Kramer multiple comparison test. MPP1, CD150<sup>-</sup>CD41<sup>-</sup>CD48<sup>-</sup>Flt3<sup>-</sup> LSK cells.

17 MPP2, CD150<sup>+</sup>CD41/CD48<sup>+</sup>Flt3<sup>-</sup> LSK cells. MPP3, CD150<sup>-</sup>CD41/CD48<sup>+</sup>Flt3<sup>-</sup> LSK cells. MPP4, Flt3<sup>+</sup> LSK

18 cells.

19

1 **Figure S3, related to Figure 3.**

2 **(A-D)** 3D plots with data points (red) used to construct the predicted planes shown in **Figures 3A-3D**.

3 **(E)** Representative flow cytometric plots for CD150<sup>+</sup>CD48<sup>-</sup> LSK culture shown in **Figure S3D**.

4 **(F)** CD150<sup>+</sup>CD41<sup>-</sup>CD48<sup>-</sup>Flt3<sup>-</sup>CD34<sup>-</sup> LSK cells (100/well) were cultured 7 days in 0.1% BSA and O<sub>2</sub>

5 conditions with 49 (7 x 7) different SCF and TPO concentrations (ranging from 0 to 300ng/mL). A

6 MACSQuant analyzer was used to determine indicated cell numbers. Data were smoothed, reshaped

7 to a 61 x 61 matrix, and presented as contour plots with a color key (n = 3 from 1 experiment)

8

9 **Figure S4, related to Figure 4.**

10 **(A-L)** BMT assay for fresh and/or cultured HSCs in five different conditions.

11 **(A)** Experimental design. CD150<sup>+</sup>CD41<sup>-</sup>CD48<sup>-</sup>Flt3<sup>-</sup>CD34<sup>-</sup> LSK cells (HSCs) from Ly5.2<sup>+</sup> mice were cultured

12 11 days. For primary BMT, 100 Freshly-isolated HSCs (Fresh), or 100 HSCs cultured with 1ng/mL SCF

13 plus 100ng/mL TPO (S1T100) in 1% O<sub>2</sub> were transplanted into lethally-irradiated (9.5Gy) Ly5.1<sup>+</sup> recipients

14 together with 4 x 10<sup>5</sup> Ly5.1<sup>+</sup> bone marrow mononuclear cells, and donor-derived chimerism of peripheral

15 blood was examined. For secondary BMT, 2 x 10<sup>6</sup> bone marrow mononuclear cells were transplanted into

16 recipients after assessment for chimerism in recipients' bone marrow.

17 **(B)** Peripheral blood chimerism of HSCs cultured 11 days in **(A)** (mean ± SD, n = 6 per each group). \**P* <

18 0.05, \*\**P* < 0.01, and \*\*\**P* < 0.001. n.s., not significant by two-tailed Student's t test.

19 **(C)** Bone marrow chimerism of donor-derived cells 4 months after primary BMT of **(B)** (n = 6 per group).

- 1 \* $P < 0.05$ , \*\* $P < 0.01$ , and \*\*\* $P < 0.001$ . n.s., not significant by two-tailed Student's t test.
- 2 **(D)** Experimental design. Replicate of **Figure 4G** with a different BSA lot and a longer culture period.
- 3 CD150<sup>+</sup>CD41<sup>-</sup>CD48<sup>-</sup>Flt3<sup>-</sup>CD34<sup>-</sup> LSK cells (HSC) from Ly5.2<sup>+</sup> mice were cultured 31 days. For primary BMT,
- 4 500 Freshly-isolated HSCs (Fresh) or 500 HSCs cultured with 3ng/mL SCF plus 100ng/mL TPO (S3T0.1)
- 5 at 1% O<sub>2</sub> were transplanted into lethally-irradiated (9.5Gy) Ly5.1<sup>+</sup> recipients together with 4 x 10<sup>5</sup> Ly5.1<sup>+</sup>
- 6 bone marrow mononuclear cells, and donor-derived chimerism of peripheral blood was examined. For
- 7 secondary BMT, 2 x 10<sup>6</sup> bone marrow mononuclear cells were transplanted into recipients as described
- 8 after assessment of chimerism in primary recipients' bone marrow. Conditions with SCF and TPO at
- 9 100ng/mL each were not tested.
- 10 **(E)** Peripheral blood chimerism of HSCs cultured 31 days in **(D)** (mean ± SD, n = 6 per each group). \* $P <$
- 11 0.05, \*\* $P < 0.01$ , and \*\*\* $P < 0.001$ . n.s., not significant by two-tailed Student's t test.
- 12 **(F)** Bone marrow chimerism of donor-derived cells 4 months after primary BMT of **(E)** (n = 6 per group).
- 13 \* $P < 0.05$ , \*\* $P < 0.01$ , and \*\*\* $P < 0.001$ . n.s., not significant by two-tailed Student's t test.
- 14 **(G)** Experimental design. CD150<sup>+</sup>CD41<sup>-</sup>CD48<sup>-</sup>Flt3<sup>-</sup> LSK cells (HSCs) from Ubc-GFP mice were cultured
- 15 28 days and then BMT was performed as in **(D)**.
- 16 **(H)** Peripheral blood chimerism of HSCs cultured 28 days in **(G)** (mean ± SD, n = 3 for Fresh and n = 4 for
- 17 S3T0.1). \* $P < 0.05$ , \*\* $P < 0.01$ , and \*\*\* $P < 0.001$ . n.s., not significant by two-tailed Student's t test.
- 18 **(I)** Experimental design. CD150<sup>+</sup>CD41<sup>-</sup>CD48<sup>-</sup>Flt3<sup>-</sup> LSK cells (HSC) from Ubc-GFP mice were cultured 11
- 19 days and then BMT was performed as in **(A)**.



- 1 **(J)** Peripheral blood chimerism of HSCs cultured 28 days **(I)** (mean  $\pm$  SD, n = 6 per group).
- 2 **(K)** Experimental design. CD150<sup>+</sup>CD41<sup>-</sup>CD48<sup>-</sup>Flt3<sup>-</sup>CD34<sup>-</sup> LSK cells (HSCs) from Ly5.2<sup>+</sup> mice were cultured  
3 28 days. An equivalent of 500 HSCs cultured with SF-O3 plus 3ng/mL SCF and 100ng/mL TPO (S3T0.1)  
4 in 1% O<sub>2</sub> under indicated conditions were transplanted into lethally-irradiated (9.5Gy) Ly5.1<sup>+</sup> recipients  
5 together with 4 x 10<sup>5</sup> Ly5.1<sup>+</sup> bone marrow mononuclear cells, and donor-derived chimerism of peripheral  
6 blood was examined. Reconst. BSA: 4% w/v fatty acid-free BSA reconstituted with sodium palmitate and  
7 sodium oleate at 200 $\mu$ g/mL each.
- 8 **(L)** Peripheral blood chimerism of HSCs cultured for 28 days in **(K)** (mean  $\pm$  SD, n = 6 for nBSA, n= 6 for  
9 FA-free, and n = 5-6 for Reconst.). \**P* < 0.05, \*\**P* < 0.01, and \*\*\**P* < 0.001. n.s., not significant between  
10 nBSA and Reconst. BSA. Wilcoxon's rank sum test was used rather than a t test due to high variation.
- 11 **(M)** Total cell number (left) and the number of CD150<sup>+</sup>CD48<sup>-</sup> LSK cells (right) after 1, 2, 3, and 4 weeks of  
12 culture of 300 CD150<sup>+</sup>CD41<sup>-</sup>CD48<sup>-</sup>Flt3<sup>-</sup>CD34<sup>-</sup> LSK cells in indicated conditions (mean  $\pm$  SD, n = 4 for each  
13 group)
- 14 **(N and O)** Indicated HSPC fractions were cultured in 1% O<sub>2</sub> for 5 days in 3ng/mL SCF and 0.1ng/mL TPO  
15 plus 4% nBSA and then analyzed by flow cytometry. 300 input cells were used. HSCs: CD150<sup>+</sup>CD41<sup>-</sup>  
16 CD48<sup>-</sup>Flt3<sup>-</sup>CD34<sup>-</sup> LSK cells. MPP1: CD150<sup>-</sup>CD41<sup>-</sup>CD48<sup>-</sup>Flt3<sup>-</sup> LSK cells. MPP2: CD150<sup>+</sup>CD41/CD48<sup>+</sup>Flt3<sup>-</sup>  
17 LSK cells. MPP3: CD150<sup>-</sup>CD41/CD48<sup>+</sup>Flt3<sup>-</sup> LSK cells. MPP4: Flt3<sup>+</sup> LSK cells.
- 18 **(N)** Representative plots for flow cytometry.
- 19 **(O)** Number of cells with indicated surface marker profile (mean  $\pm$  SD, n = 4).

1 **(P-S)** CD150<sup>+</sup>CD41<sup>-</sup>CD48<sup>-</sup>Flt3<sup>-</sup>CD34<sup>-</sup> LSK cells (HSCs) and Flt3<sup>+</sup> LSK cells (MPP4) were cultured 7 days  
2 in indicated cytokine conditions in 1% O<sub>2</sub>. 100 input cells were used. Medium contained 4% nBSA. Shown  
3 are representative plots for flow cytometry **(P)**, and total cell number in low **(Q)** or high **(R)** cytokine  
4 conditions (mean ± SD, n = 4). \**P* < 0.05, \*\**P* < 0.01, and \*\*\**P* < 0.001. n.s., not significant by two-tailed  
5 Student's t test between HSC and MPP4.

6 **(S)** Doubling time of HSCs and MPP4s, as estimated from observations shown in **(Q)**, and **(R)**.

7

8 **Figure S5, related to Figure 5.**

9 **(A)** Gene expression levels in indicated samples from microarray data shown in **Figure 5A**. Differentially  
10 expressed genes are in dark blue, and fatty acid-synthesis-related genes are in red. Correlation coefficient  
11 *r* is noted.

12 **(B)** Gene set enrichment analysis (GSEA) of cDNA microarray data of fresh HSCs and HSCs cultured 7  
13 days (a mixture of nBSA and reconstituted BSA samples) in **Figure 5A**. FDR, false discovery rate. NES,  
14 normalized enrichment score.

15 **(C)** Principal component analysis of the sc-qPCR data in **Figure 5D**, overlaid by color keys indicating ΔCt  
16 values for each gene.

17 **(D)** Violin plots of gene expression levels of HSC- and differentiation-related genes as measured by sc-  
18 qPCR in **Figure 5D**. False discovery rate (FDR) was calculated after analysis using a two-tailed Student's  
19 t test.

1 (E) Correlation coefficient matrix with hierarchical clustering of differentially expressed genes between  
2 fresh and cultured HSCs. sc-qPCR data of fresh (top) and cultured (bottom) HSCs were separately  
3 analyzed.

4 (F) Effects of insulin and cholesterol on HSC phenotypes. CD150<sup>+</sup>CD48<sup>-</sup>CD41<sup>-</sup> LSK cells were cultured 7  
5 days in 4% nBSA (BSA only) or 4% nBSA plus a fatty-acid mixture (palmitate, oleate, linoleate, and stearate  
6 at a 4:3:2:1 ratio), with or without cholesterol in 1% O<sub>2</sub>. Insulin was added at indicated concentrations  
7 (mean±SD, n=4). The number of total cells, CD150<sup>+</sup>CD48<sup>-</sup> LSK cells, and megakaryocytes, and mean  
8 fluorescence intensity (MFI) of Sca-1, and CD41 were measured. P values were calculated by two-way  
9 ANOVA to examine effects of insulin ( $P_{ins}$ ) and cholesterol ( $P_{cho}$ ). BSA only plus 4000ng/mL insulin samples  
10 were removed from the ANOVA.

11

12 **Figure S6, related to Figure 6.**

13 (A) 3D plots with data points (red) used to predict the plane shown in Figure 6A.

14 (B) Phosphorylation status of S6, ERK1/2, and STAT5 in hematopoietic stem/progenitors based on  
15 intracellular flow cytometry following cytokine exposure. Bone marrow cells were incubated for 0 (untreated  
16 control), 10, 30, and 120 minutes with indicated cytokine conditions. Shown is fold-change of mean  
17 fluorescent intensity (MFI) relative to untreated control of phosphoproteins in indicated fractions (n = 1 for  
18 each group).

19 (C) Representative flow cytometric plots (left) and the number of CD150<sup>+</sup>CD48<sup>-</sup> LSK cells after 8 days of

1 culture with 1 $\mu$ M of the AKT inhibitor Triciribine (right) (mean  $\pm$  SD, n=4). \* $P$  < 0.05, \*\* $P$  < 0.01, \*\*\* $P$  <  
2 0.001 by Tukey-Kramer multiple comparison test.

3

4 **Figure S7, related to Figure 7.**

5 **(A-E)** Frozen adult bone marrow CD34<sup>+</sup> cells were thawed and stained for surface markers, and  
6 CD34<sup>+</sup>CD38<sup>-</sup>CD90<sup>+</sup>CD45RA<sup>-</sup> cells were sorted and a total of 600 cells were cultured 7 days in indicated  
7 conditions. Experimental design **(A)**. To assess effects of fatty acid and cholesterol, human HSCs were  
8 cultured in indicated fatty acid ( $\mu$ g/mL) and cholesterol ( $\mu$ g/mL) concentrations in 1% O<sub>2</sub>. Medium was SF-  
9 O3+4% nBSA plus a FA mixture (palmitate, oleate, linoleate, and stearate at a 4:3:2:1 ratio). Media  
10 contained SCF and TPO at 3ng/mL each. The number of total cells and CD34<sup>+</sup>CD38<sup>-</sup> and CD34<sup>+</sup>CD38<sup>-</sup>  
11 CD90<sup>+</sup>CD45RA<sup>-</sup> cells was determined (mean  $\pm$  SD, n=4). P values were calculated by two-way ANOVA to  
12 examine the influence of fatty acid ( $P_{FA}$ ) and cholesterol ( $P_{chol}$ ) **(B)**. Representative plots showing flow  
13 cytometry analysis of HSCs cultured in 200 $\mu$ g/mL FA, 20 $\mu$ g/mL cholesterol, and SCF and TPO at 3ng/mL  
14 in 1% O<sub>2</sub> **(C)**. HSCs were cultured in indicated fatty acid ( $\mu$ g/mL), and cholesterol ( $\mu$ g/mL) concentrations  
15 in 1% O<sub>2</sub>. Medium was SF-O3 plus 4% FA-free BSA plus a FA mixture (palmitate, oleate, linoleate, and  
16 stearate at a 4:3:2:1 ratio). SCF and TPO were at 3ng/mL each. Total, CD34<sup>+</sup>CD38<sup>-</sup>, and CD34<sup>+</sup>CD38<sup>-</sup>  
17 CD90<sup>+</sup>CD45RA<sup>-</sup> cells were measured (mean  $\pm$  SD, n=4). P values were calculated by two-way ANOVA to  
18 examine the influence of fatty acid ( $P_{FA}$ ) and cholesterol ( $P_{chol}$ ) **(D)**. To assess insulin dependency, 1000  
19 human CD34<sup>+</sup>CD38<sup>-</sup>CD90<sup>+</sup>CD45RA<sup>-</sup> cells were cultured 7 days in indicated insulin concentrations. Culture

1 medium was  $\alpha$ MEM plus 4% enhanced BSA (palmitate, oleate, linoleate, and stearate at a 4:3:2:1 ratio  
2 and 20 $\mu$ g/mL cholesterol). S3: SCF 3ng/mL. S6: SCF 6ng/mL, T3: TPO 3ng/mL. T6: TPO 6ng/mL. The  
3 number of total, CD34<sup>+</sup>CD38<sup>-</sup>, and CD34<sup>+</sup>CD38<sup>-</sup>CD90<sup>+</sup>CD45RA<sup>-</sup> cells was measured (mean  $\pm$  SD, n=4).  
4 P values were calculated by two-way ANOVA to examine the influence of cytokine ( $P_{\text{cytokine}}$ ) and insulin  
5 ( $P_{\text{insulin}}$ ) (E).  
6 (F) HSC proliferation or survival in the presence of fatty acid synthesis inhibitors, and in the presence or  
7 absence of fatty acids. A total of 600 CD34<sup>+</sup>CD38<sup>-</sup>CD90<sup>+</sup>CD45RA<sup>-</sup> cells were cultured 7 days with indicated  
8 inhibitors. Medium was SF-O3 supplemented with either 0.1% nBSA, 10% serum, 4% FA-free BSA, or 4%  
9 nBSA. Also added was SCF and TPO at 3ng/mL each (left panel) or SCF, TPO and FLT3L each at 50ng/mL  
10 (right panel). The lower cytokine group was cultured in 1% O<sub>2</sub>, and the higher cytokine group was cultured  
11 in 20% O<sub>2</sub> conditions.

12

## KEY RESOURCES TABLE

| REAGENT or RESOURCE                                    | SOURCE            | IDENTIFIER                          |
|--------------------------------------------------------|-------------------|-------------------------------------|
| Antibodies                                             |                   |                                     |
| Anti-mouse CD4-PerCP-Cy5.5 (clone: RM4-5)              | TONBO biosciences | Cat# 65-0042-U100; RRID: AB_2621876 |
| Anti-mouse CD8a-PerCP-Cy5.5 (clone: 53-6.7)            | TONBO biosciences | Cat# 65-0081-U100; RRID: AB_2621882 |
| Anti-mouse B220-PerCP-Cy5.5 (clone: RA3-6B2)           | TONBO biosciences | Cat# 65-0452-U100; RRID: AB_2621892 |
| Anti-mouse B220-APC (clone: RA3-6B2)                   | BioLegend         | Cat# 103212; RRID: AB_312997        |
| Anti-mouse Ter-119-PerCP-Cy5.5 (clone: TER-119)        | TONBO biosciences | Cat# 65-5921-U100                   |
| Anti-mouse Gr1 (Ly-6G/6C)-PerCP-Cy5.5 (clone: RB6-8C5) | BioLegend         | Cat# 108428; RRID: AB_893558        |
| Anti-mouse Gr1-PE-Cy7 (clone: RB6-8C5)                 | TONBO biosciences | Cat# 60-5931-U100; RRID: AB_2621870 |
| Anti-mouse Mac1 (CD11b)-PerCP-Cy5.5 (clone: M1/70)     | TONBO biosciences | Cat# 65-0112-U100; RRID: AB_2621885 |
| Anti-mouse Mac1-PE-Cy7 (clone: M1/70)                  | TONBO biosciences | Cat# 60-0112-U100; RRID: AB_2621836 |
| Anti-mouse CD45.1-PE (clone: A20)                      | BD biosciences    | Cat# 553776; RRID: AB_395044        |
| Anti-mouse CD45.1-Alexa700 (clone: A20)                | BioLegend         | Cat# 110724; RRID: AB_493733        |
| Anti-mouse CD45.2-FITC (clone: 104)                    | BD biosciences    | Cat# 553772; RRID: AB_395041        |
| Anti-mouse Sca-1 (Ly-6A/E)-PE-Cy7 (clone: E13-161.7)   | BioLegend         | Cat# 122514; RRID: AB_756199        |
| Anti-mouse Sca-1-Alexa700 (clone: D7)                  | eBioscience       | Cat# 56-5981-80; RRID: AB_657837    |
| Anti-mouse c-Kit (CD117)-APC-Cy7 (clone: 2B8)          | BioLegend         | Cat# 105826; RRID: AB_1626278       |
| CD117 MicroBeads Mouse                                 | Miltenyi Biotec   | Cat# 130-091-224                    |
| Anti-mouse CD150-PE (clone: TC15-12F12.2)              | BioLegend         | Cat# 115904; RRID: AB_313683        |
| Anti-mouse CD150-BV421 (clone: TC15-12F12.2)           | BioLegend         | Cat# 115926; RRID: AB_2562190       |
| Anti-mouse CD48-FITC (clone: HM48-1)                   | BioLegend         | Cat# 103404; RRID: AB_313019        |
| Anti-mouse CD48-PE (clone: HM48-1)                     | BioLegend         | Cat# 103406; RRID: AB_313021        |
| Anti-mouse CD41-FITC (clone: MWReg30)                  | BD biosciences    | Cat# 553848; RRID: AB_395085        |
| Anti-mouse CD41-PE (clone: MWReg30)                    | BD biosciences    | Cat# 558040; RRID: AB_397004        |
| Anti-mouse CD41-APC (clone: MWReg30)                   | BioLegend         | Cat# 133914; RRID: AB_11125581      |
| Anti-P-selectin (CD62P)-BV421 (clone: RB40.34)         | BD biosciences    | Cat# 564289                         |
| Anti-CD34-BV421 (clone: RAM34)                         | BD biosciences    | Cat# 562608; RRID: AB_11154576      |
| Anti-CD34-BV421 (clone: )                              | BioLegend         |                                     |
| Anti-Flt3 (CD135)-APC (clone: A2F10)                   | BioLegend         | Cat# 135310; RRID: AB_2107050       |

|                                               |                          |                                                     |
|-----------------------------------------------|--------------------------|-----------------------------------------------------|
| Anti-ERK(pT202/pY204)                         | BD biosciences           | Cat# 612592; RRID: AB_399875                        |
| Anti-S6 (pS235/pS236) (clone: N7-548)         | BD biosciences           | Cat# 560434; RRID:                                  |
| Anti-STAT5 (pY694)                            | BD biosciences           | Cat# 612598; RRID: AB_399881                        |
| Anti-human CD34-FITC (clone: 581)             | BD biosciences           | Cat# 560942; RRID: AB_10562559                      |
| Anti-human CD38-PerCP-Cy5.5 (clone:           | BD biosciences           | Cat# 551400; RRID: AB_394184                        |
| Anti-human CD45RA-PE                          | BD biosciences           | Cat# 555489; RRID: AB_395880                        |
| Anti-human CD90-PE-Cy7 (clone: 5E10)          | BD biosciences           | Cat# 561558; RRID: AB_10714644                      |
| Anti-human CD13-PE (clone: WM15)              | BioLegend                | Cat# 301703; RRID: AB_314179                        |
| Anti-human CD33-PE (clone: WM53)              | BD biosciences           | Cat# 561816; RRID: AB_10896480                      |
| Anti-human CD19-APC (clone: SJ259)            | BioLegend                | Cat# 363005; RRID: AB_2564127                       |
| Anti-human CD3-APC-Cy7 (clone: SK7)           | BD biosciences           | Cat# 561800; RRID: AB_10895381                      |
| Anti-human CD45-BV421 (clone: HI30)           | BD biosciences           | Cat# 563880                                         |
| Anti-mouse CD45-PE-Cy7 (clone: 30-F11)        | BioLegend                | Cat# 103114; RRID: AB_312979                        |
| Anti-mouse Ter-119-PE-Cy7 (clone: TER-119)    | BD biosciences           | Cat# 557853; RRID: AB_396898                        |
| Fc-block (anti-mouse CD16/32) (clone: 2.4-G2) | BD biosciences           | Cat# 553142; RRID: AB_394657                        |
| Chemicals, Peptides, and Recombinant Proteins |                          |                                                     |
| PBS                                           | Nacalai Tesque           | Cat# 14249-24                                       |
| SF-O3                                         | SEKISUI MEDICAL          | SS1303                                              |
| DMEM/Ham's-F12 medium                         | Nacalai Tesque           | Cat# 11581-15                                       |
| $\alpha$ MEM                                  | Thermo Fisher Scientific | Cat# 12571-063                                      |
| IST                                           | Thermo Fisher Scientific | Cat# 41400-045                                      |
| Penicilin                                     | Meiji Seika              | PGLD755                                             |
| Streptomycin sulfate                          | Meiji Seika              | SSDN1013                                            |
| Sodium selenite                               | Nacalai Tesque           | Cat# 11707-04                                       |
| Fetal bovine serum                            | Biowest                  | Cat# S1820-500                                      |
| Fetal bovine serum                            | Thermo Fisher Scientific | Cat# 10270-106                                      |
| Bovine serum albumin                          | Sigma Aldrich            | Cat# A4503-100G; Lot# SLBL2616V; SLBT8839; SLBW2268 |
| Fatty-acid free bovine serum albumin          | Sigma Aldrich            | Cat# A7030-10G; Lot# SLBS2022V; SLBS7621            |
| FITC-albumin (40mg/kg body weight,)           | Merck                    | Cat# A9771                                          |
| 500 kDa TRITC-dextran                         | Merck                    | Cat# 52194                                          |
| 2-mercapto ethanol (2-ME) 1000x               | Life Technologies        | Cat# 21985-023                                      |

|                                                     |                                   |                               |
|-----------------------------------------------------|-----------------------------------|-------------------------------|
| Sodium Palmitate                                    | Tokyo Chemical Industry Co., Ltd. | Cat# P0007                    |
| Sodium Oleate                                       | Tokyo Chemical Industry Co., Ltd. | Cat# O0057                    |
| Sodium Linoleate                                    | Tokyo Chemical Industry Co., Ltd. | Cat# L0056                    |
| Sodium Stearate                                     | Tokyo Chemical Industry Co., Ltd. | Cat# S0081                    |
| Cholesterol                                         | Tokyo Chemical Industry Co., Ltd. | Cat# C0318                    |
| 1,2 Di-Palmitoyl sn-glycero-3-phosphocholine        | Tokyo Chemical Industry Co., Ltd. | Cat# D3925                    |
| Recombinant Murine SCF                              | PeproTech                         | Cat# 250-03                   |
| Recombinant Human TPO                               | PeproTech                         | Cat# 300-18                   |
| Recombinant Human SCF                               | PeproTech                         | Cat# 300-07                   |
| Recombinant Murine Flt3 ligand                      | PeproTech                         | Cat# 250-31L                  |
| Recombinant Murine IL6                              | PeproTech                         | Cat# 216-16                   |
| Recombinant human Flt3 ligand                       | PeproTech                         | Cat# 300-19                   |
| Recombinant human insulin                           | Nacalai Tesque                    | Cat# 12878-86                 |
| Recombinant human holo-transferrin                  | Nacalai Tesque                    | Cat# 34443-44                 |
| DMSO                                                | Sigma Aldrich                     | Cat# D8418                    |
| TOFA                                                | Cayman Chemical                   | Cat# 10005263                 |
| Ceruleinin                                          | Cayman Chemical                   | Cat# 10005647                 |
| A939572                                             | ApexBio Technology                | Cat# B3607                    |
| Jak inhibitor I                                     | Calbiochem                        | Cat# 420099; CAS 450781-03-7  |
| MEK inhibitor I                                     | Calbiochem                        | Cat# 444937; CAS 297744-42-4  |
| Fatostatin A                                        | R&D Systems                       | Cat# 4444/10; CAS 298197-04-3 |
| Etomoxir                                            | Sigma Aldrich                     | Cat#1905-5MG                  |
| Triciribine                                         | Calbiochem                        | Cat# 124012; CAS 35943-35-2   |
| PI-103                                              | Calbiochem                        | Cat# 52810; CAS371935-74-9    |
| G418 Disulfite Aqueous Solution                     | Nacalai Tesque                    | Cat# 16513-26                 |
| SYBR Premix Ex Taq™ II (Tli RNaseH Plus)            | Takara Bio                        | Cat# RR820                    |
| Click-iT EdU AlexaFluor647 Flow Cytometry Assay Kit | Thermo Fisher Scientific          | Cat# C10419                   |
| Annexin V-PE                                        | BD Biosciences                    | Cat# 556421                   |
| Propidium iodide                                    | Lifetechnologies                  | Cat# P3566                    |
| Flow-Check Fluorspheres                             | Beckman Coulter                   | Cat# 7547053                  |
| <b>Critical Commercial Assays</b>                   |                                   |                               |
| RNeasy Mini Kit                                     | QIAGEN                            | Cat# 74104                    |
| SuperScript VILO                                    | Thermo Fisher Scientific          | Cat# 11754-050                |
| 2-mercapto ethanol                                  | Sigma Aldrich                     | M6250                         |
| SurePrint G3 Mouse GE Mouse 8x60K Microarray Kit    | Agilent                           | Cat# G4852A                   |
| C1 Single-Cell AutoPrep Reagent Kit                 | Fluidigm                          | Cat# 100-5319                 |
| C1 IFC for PreAmp                                   | Fluidigm                          | Cat# 100-5757                 |
| Ambion Single Cell-to-CT Kit                        | Thermo Fisher Scientific          | Cat# 4458237                  |



|                                                      |                                |                                                                                                                                                                   |
|------------------------------------------------------|--------------------------------|-------------------------------------------------------------------------------------------------------------------------------------------------------------------|
| TaqMan Fast Universal PCR Master Mix                 | Thermo Fisher Scientific       | Cat# 4352042                                                                                                                                                      |
| GE 96. 96 Dynamic Array Sample & Loading Reagent Kit | Fluidigm                       | Cat# 85000802                                                                                                                                                     |
| GE 96.96 Dynamic Array IFC                           | Fluidigm                       | Cat# BMK-M-96. 96                                                                                                                                                 |
| Fatty Acid Methyl Ester Purification Kit (50 tests)  | Nacalai Tesque                 | Cat# 16961-14                                                                                                                                                     |
| Fatty-acid methylation kit                           | Nacalai Tesque                 | Cat# 16962-04                                                                                                                                                     |
| Mouse Albumin ELISA Kit                              | Abcam                          | Cat# ab108792                                                                                                                                                     |
| Deposited Data                                       |                                |                                                                                                                                                                   |
| Raw and analyzed microarray data                     | This paper                     | GEO: GSE117515                                                                                                                                                    |
| Raw and analyzed microarray data                     | This paper                     | GEO: GSE117516                                                                                                                                                    |
| Experimental Models: Organisms/Strains               |                                |                                                                                                                                                                   |
| Mouse: C57BL/6JmsSlc                                 | Japan SLC, Inc.                | <a href="http://www.jslc.co.jp/english/index2.htm">http://www.jslc.co.jp/english/index2.htm</a>                                                                   |
| Mouse: C57BL/6J-Ly5.1                                | CLEA Japan, Inc                | N/A                                                                                                                                                               |
| Mouse: C57BL/6-Tg(UBC-GFP)30Scha/J                   | The Jackson Laboratory         | JAX stock #004353                                                                                                                                                 |
| Mouse: NOD/Shi-scid,IL-2RyKO Jic                     | In-Vivo Science Inc.           | <a href="https://www.invivoscience.com/en/nog_mouse.html">https://www.invivoscience.com/en/nog_mouse.html</a>                                                     |
| Oligonucleotides                                     |                                |                                                                                                                                                                   |
| conventional qPCR primers, see Table S1              | TaKaRa bio                     | N/A                                                                                                                                                               |
| Taqman assays for single-cell qPCR, see Table S2     | Thermo Fisher Scientific       | N/A                                                                                                                                                               |
| Software and Algorithms                              |                                |                                                                                                                                                                   |
| R v3.3.2                                             | R Development Core Team (2008) | <a href="http://www.r-project.org">http://www.r-project.org</a>                                                                                                   |
| qvalue                                               | Storey et al., 2015            | <a href="https://bioconductor.org/packages/release/bioc/html/qvalue.html">https://bioconductor.org/packages/release/bioc/html/qvalue.html</a>                     |
| ggplot2                                              | Wickham, 2009                  | <a href="https://ggplot2.tidyverse.org/">https://ggplot2.tidyverse.org/</a>                                                                                       |
| gplots                                               | Warnes et al., 2016            | <a href="https://cran.r-project.org/web/packages/gplots/index.html">https://cran.r-project.org/web/packages/gplots/index.html</a>                                 |
| rgl                                                  | Adler et al., 2018             | <a href="https://cran.r-project.org/web/packages/rgl/index.html">https://cran.r-project.org/web/packages/rgl/index.html</a>                                       |
| GSEA software                                        | Broad Institute                | <a href="http://software.broadinstitute.org/gsea/index.jsp">http://software.broadinstitute.org/gsea/index.jsp</a>                                                 |
| Ingenuity Pathway Analysis                           | QIAGEN                         | <a href="https://www.qiagenbioinformatics.com/products/ingenuity-pathway-analysis/">https://www.qiagenbioinformatics.com/products/ingenuity-pathway-analysis/</a> |
| FlowJo version 9                                     | Tree Star                      | <a href="https://www.flowjo.com/solutions/flowjo">https://www.flowjo.com/solutions/flowjo</a>                                                                     |
| GeneSpring                                           | Agilent                        | <a href="https://www.chem-agilent.com/contents.php?id=27881">https://www.chem-agilent.com/contents.php?id=27881</a>                                               |

**Figure 1. Serum-free HSC culture induces fatty acid dependence in HSCs**

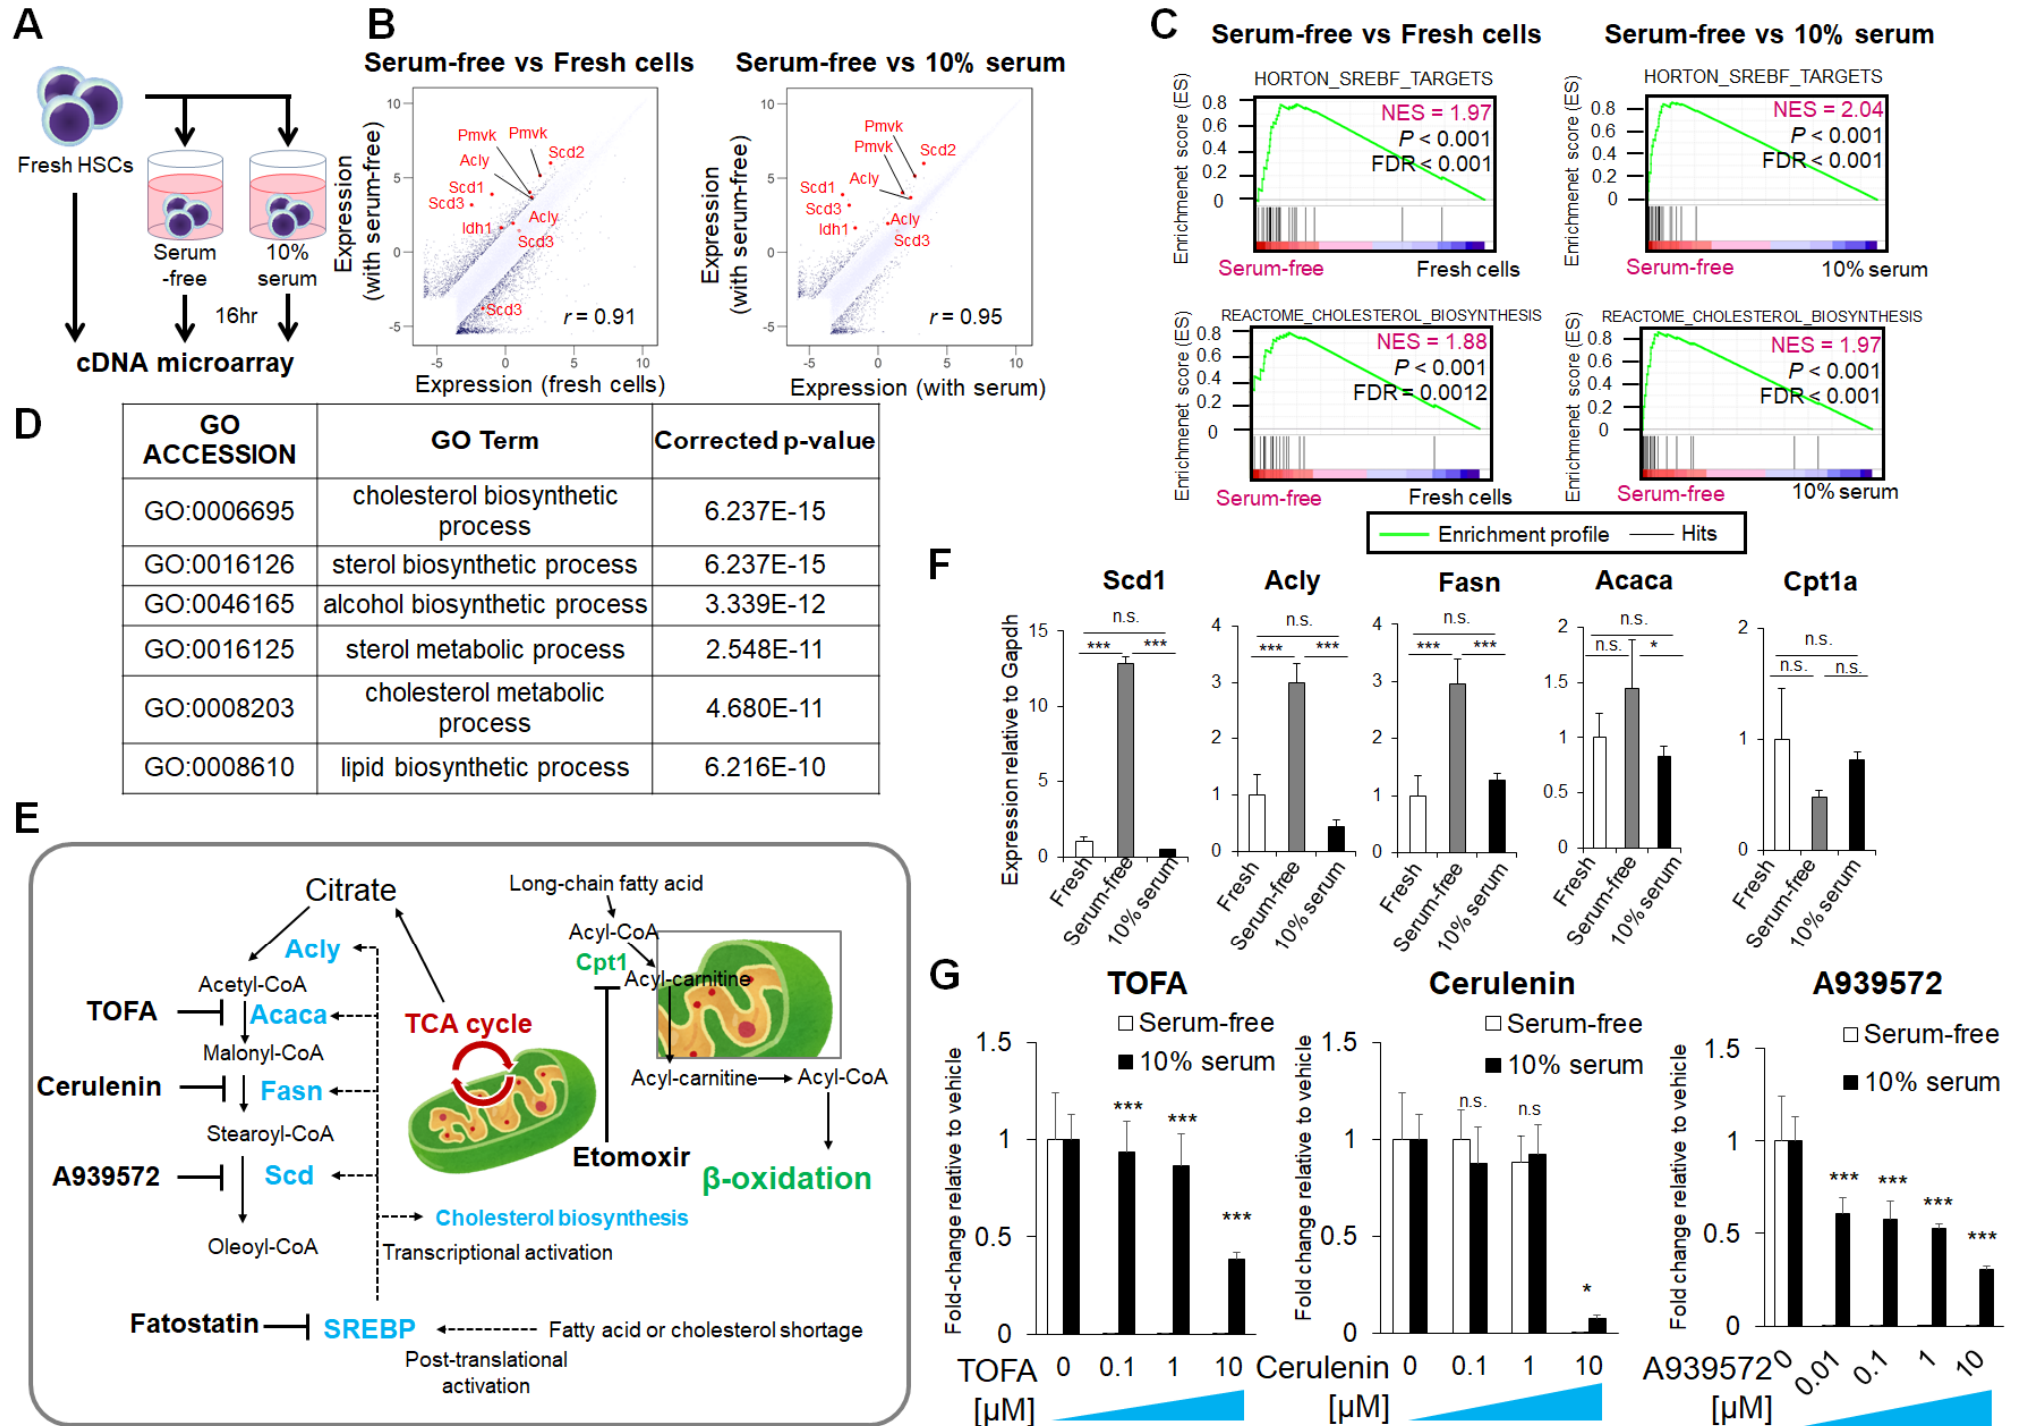

**Figure 2. Albumin is a source of fatty acid for HSCs**

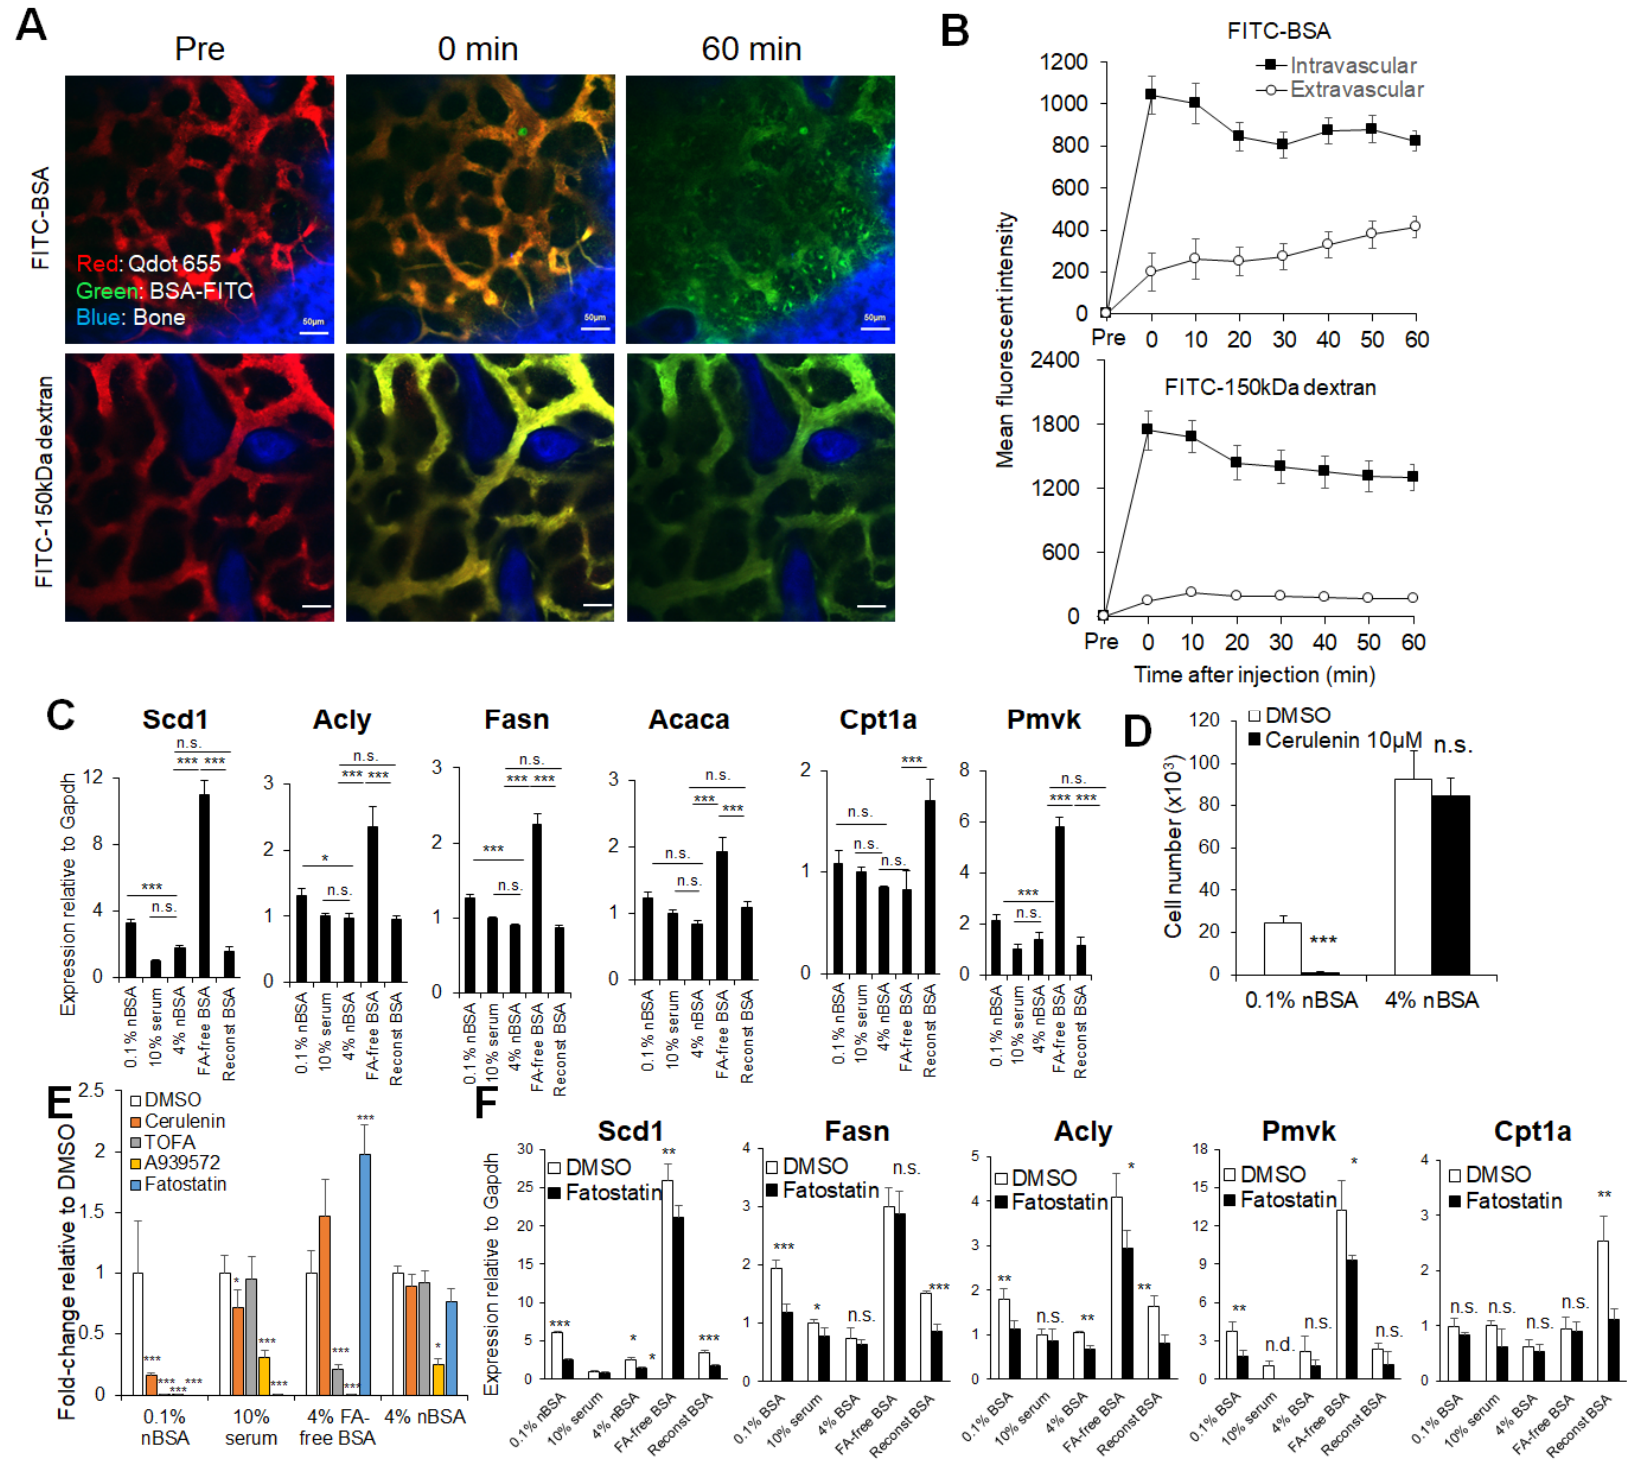





**Figure 4. Hypoxia and low cytokine conditions are essential for maintenance of functional HSCs**

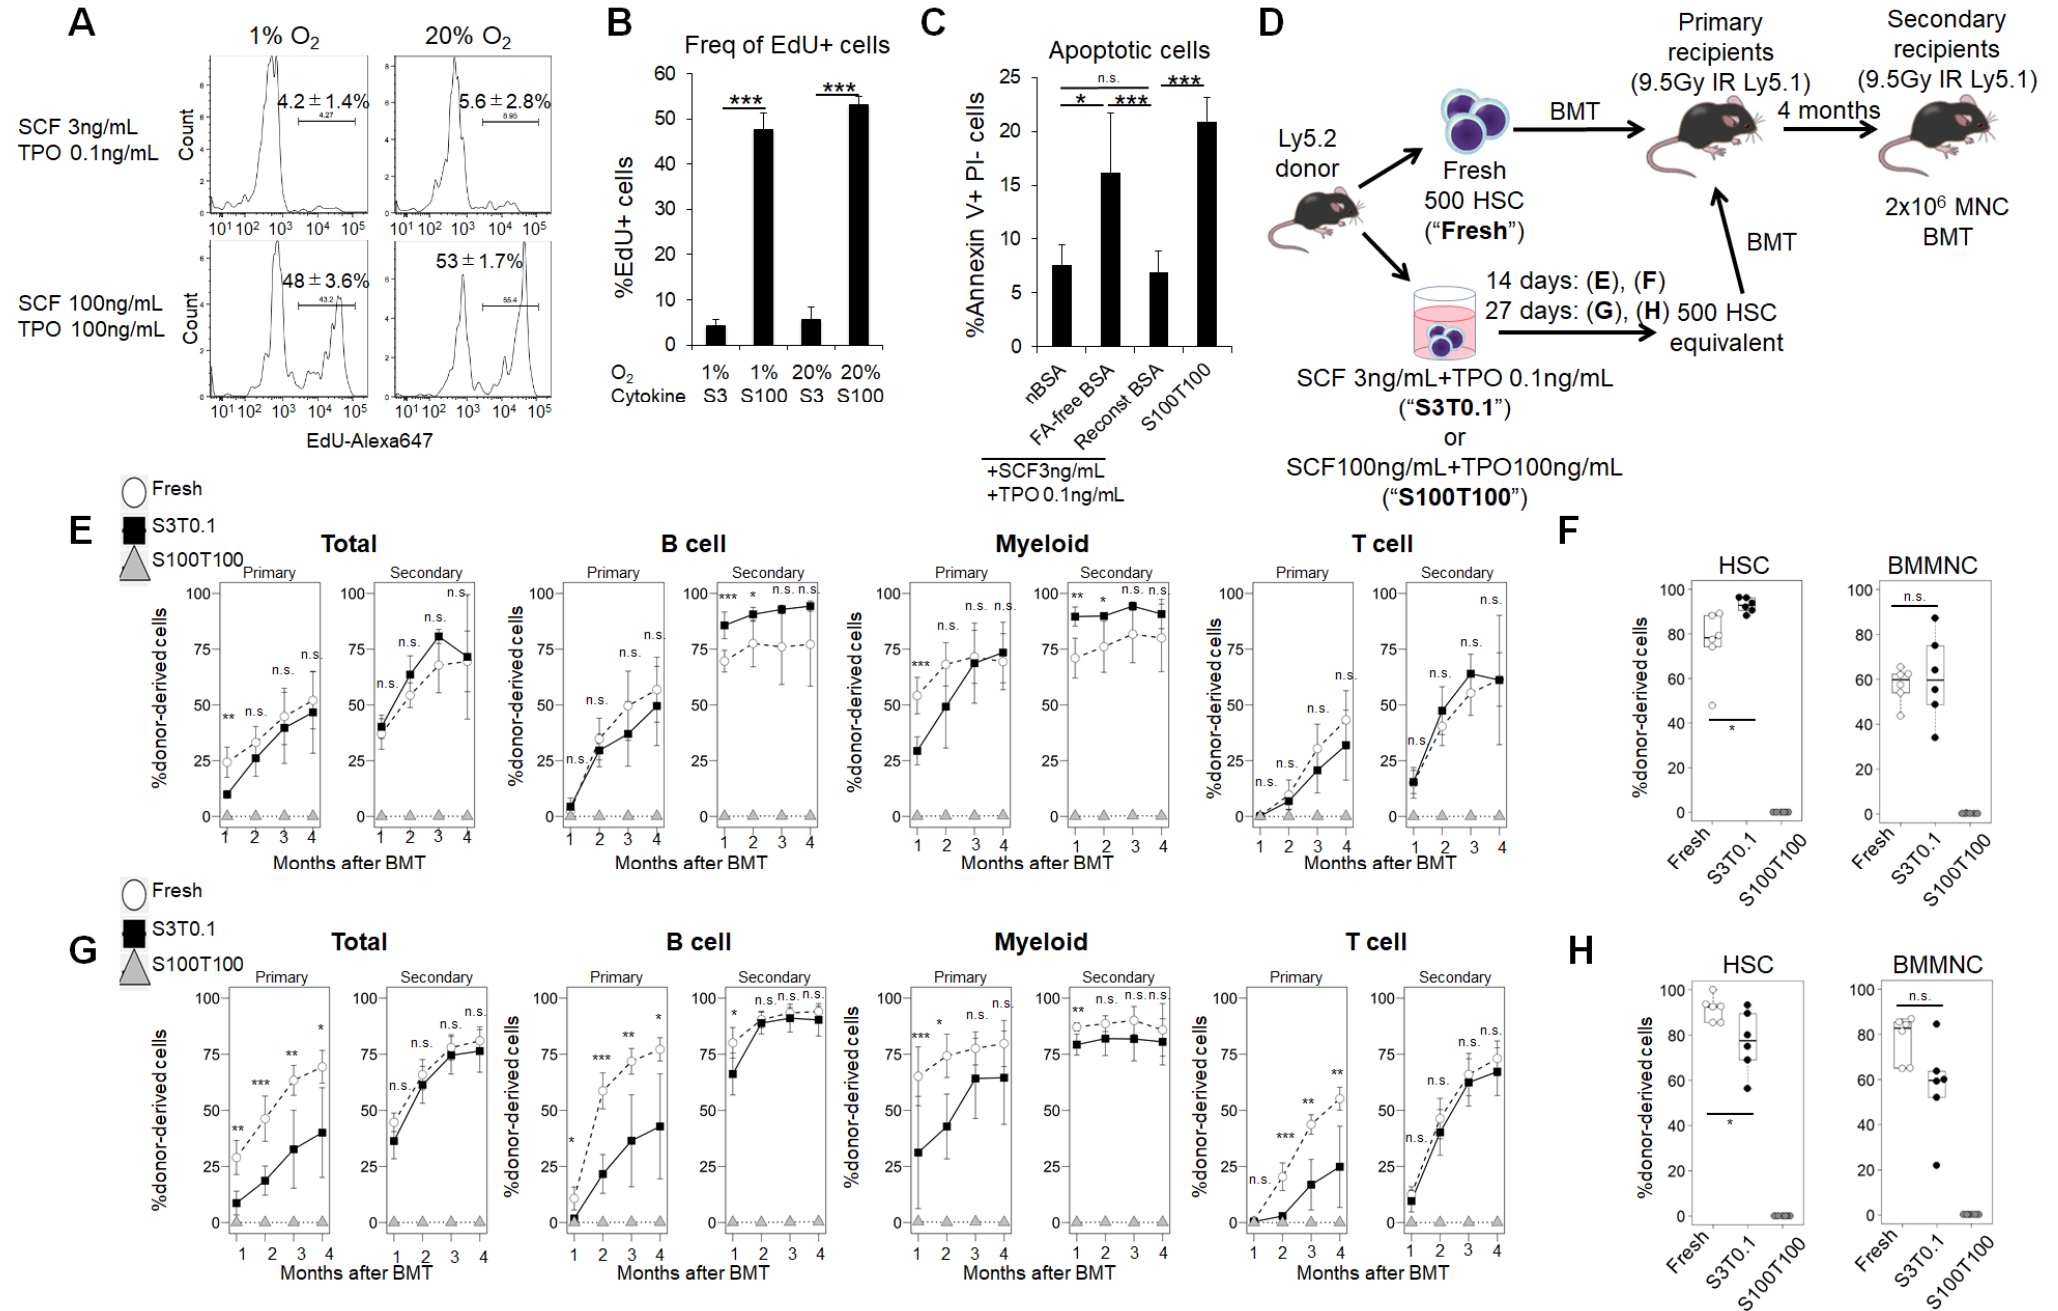

**Figure 5. Properties of fresh versus cultured HSCs**

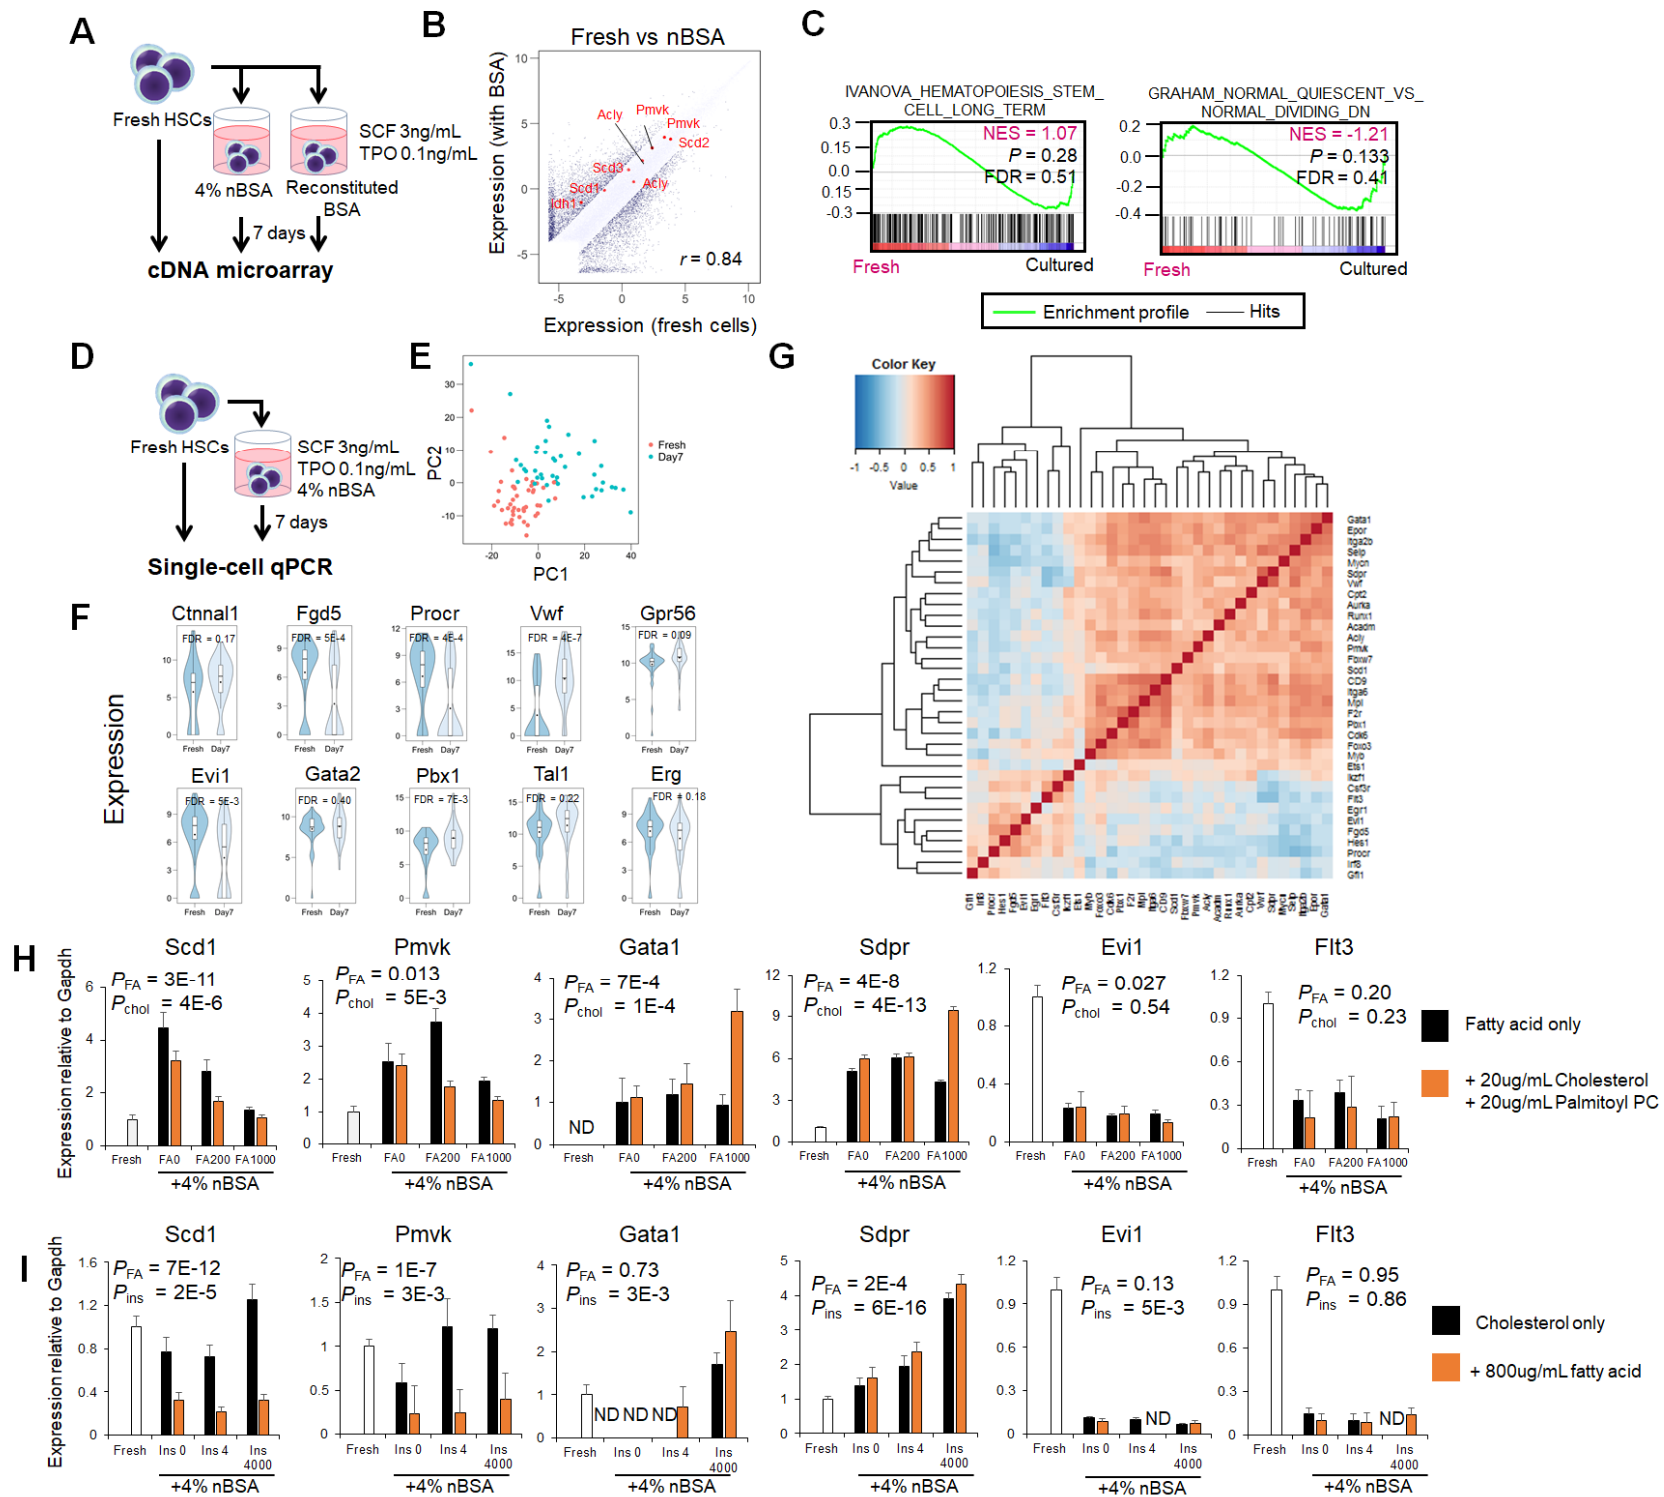

**Figure 6. Low-cytokine and hypoxic condition enhances the extrinsic fatty acid dependence to HSC**

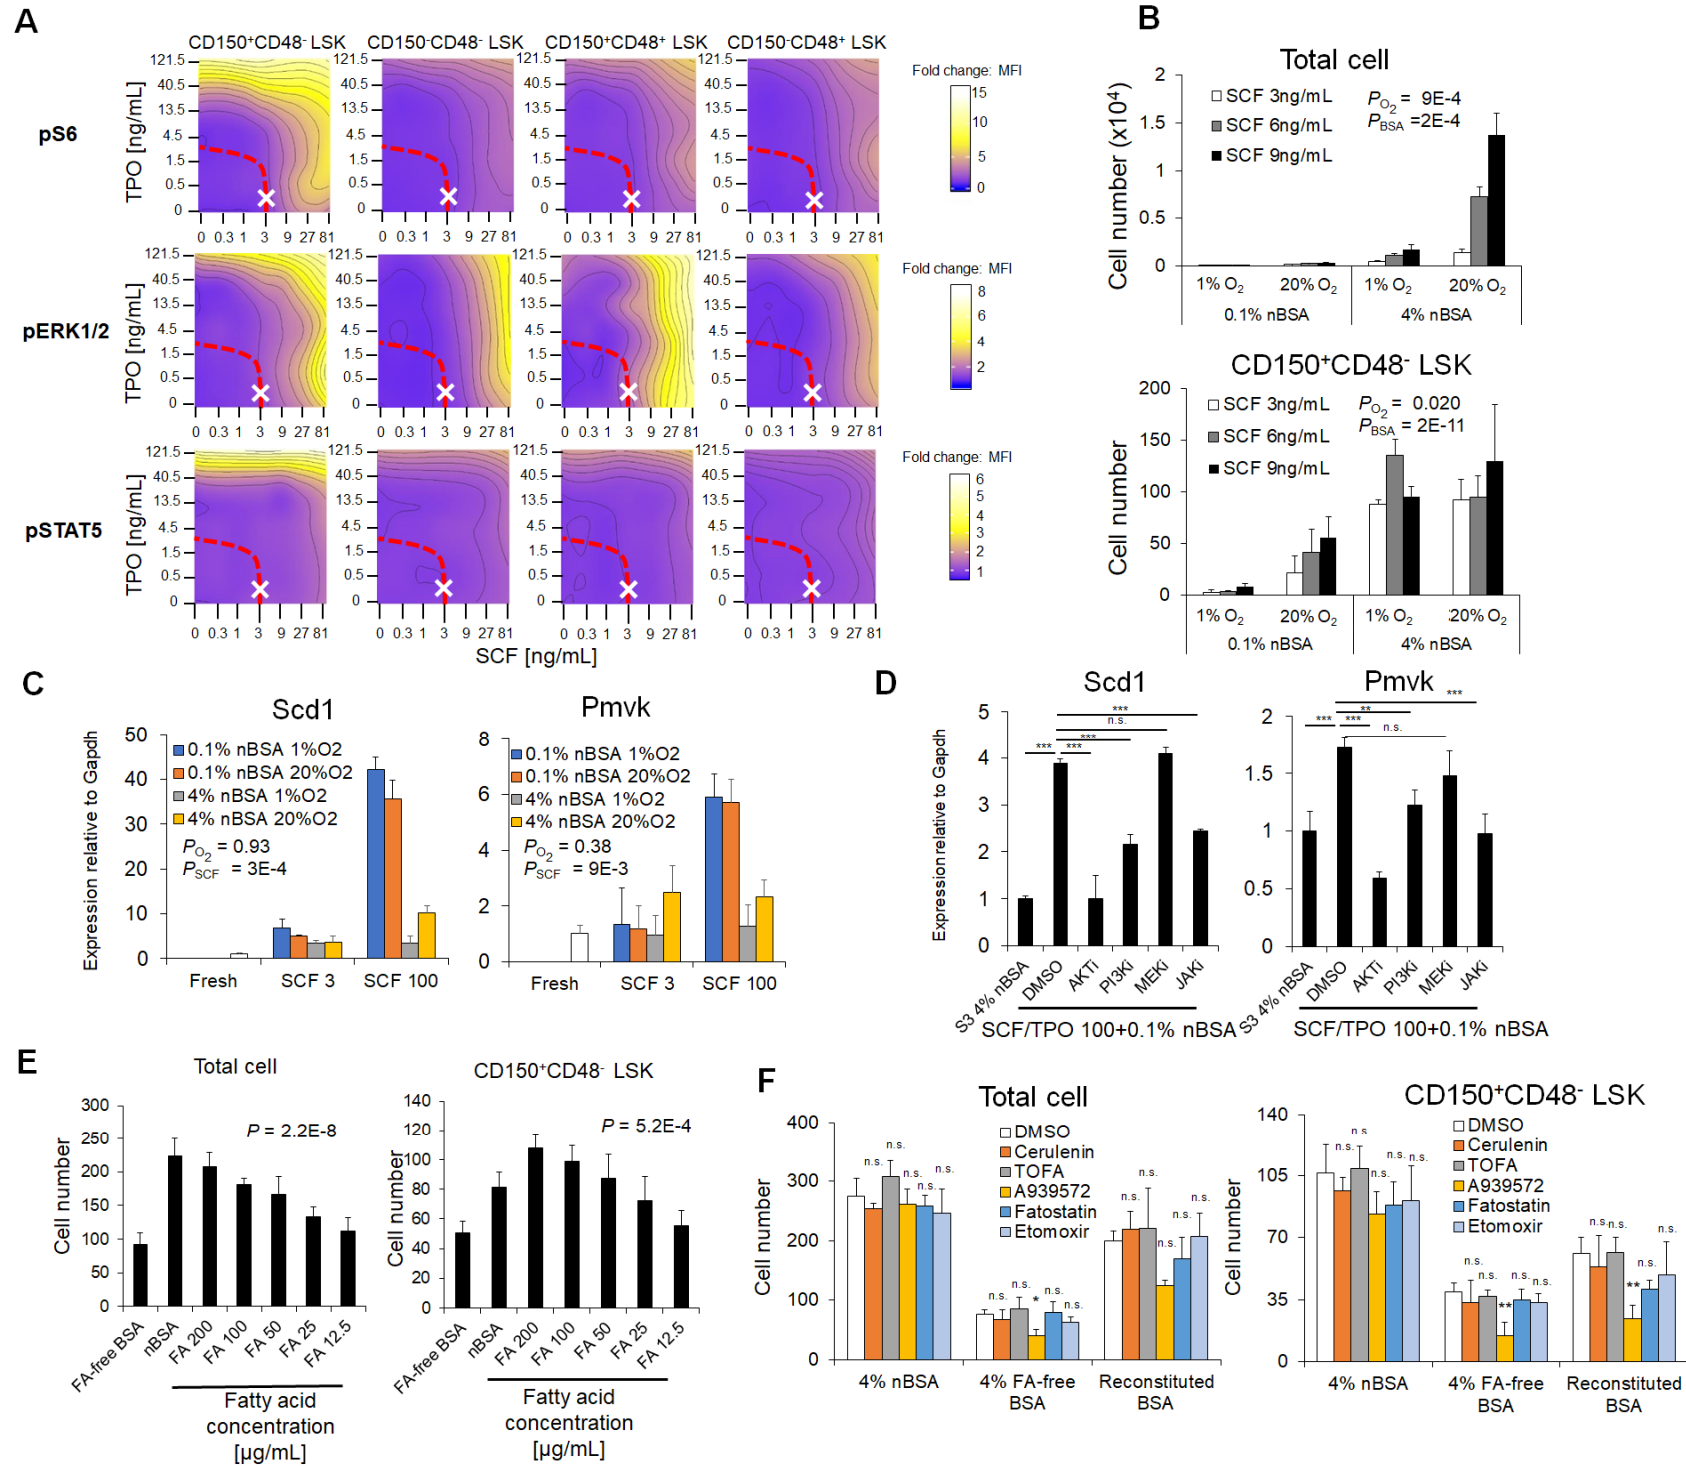

**Figure 7. Human HSCs require both fatty acid and cholesterol for maintenance**

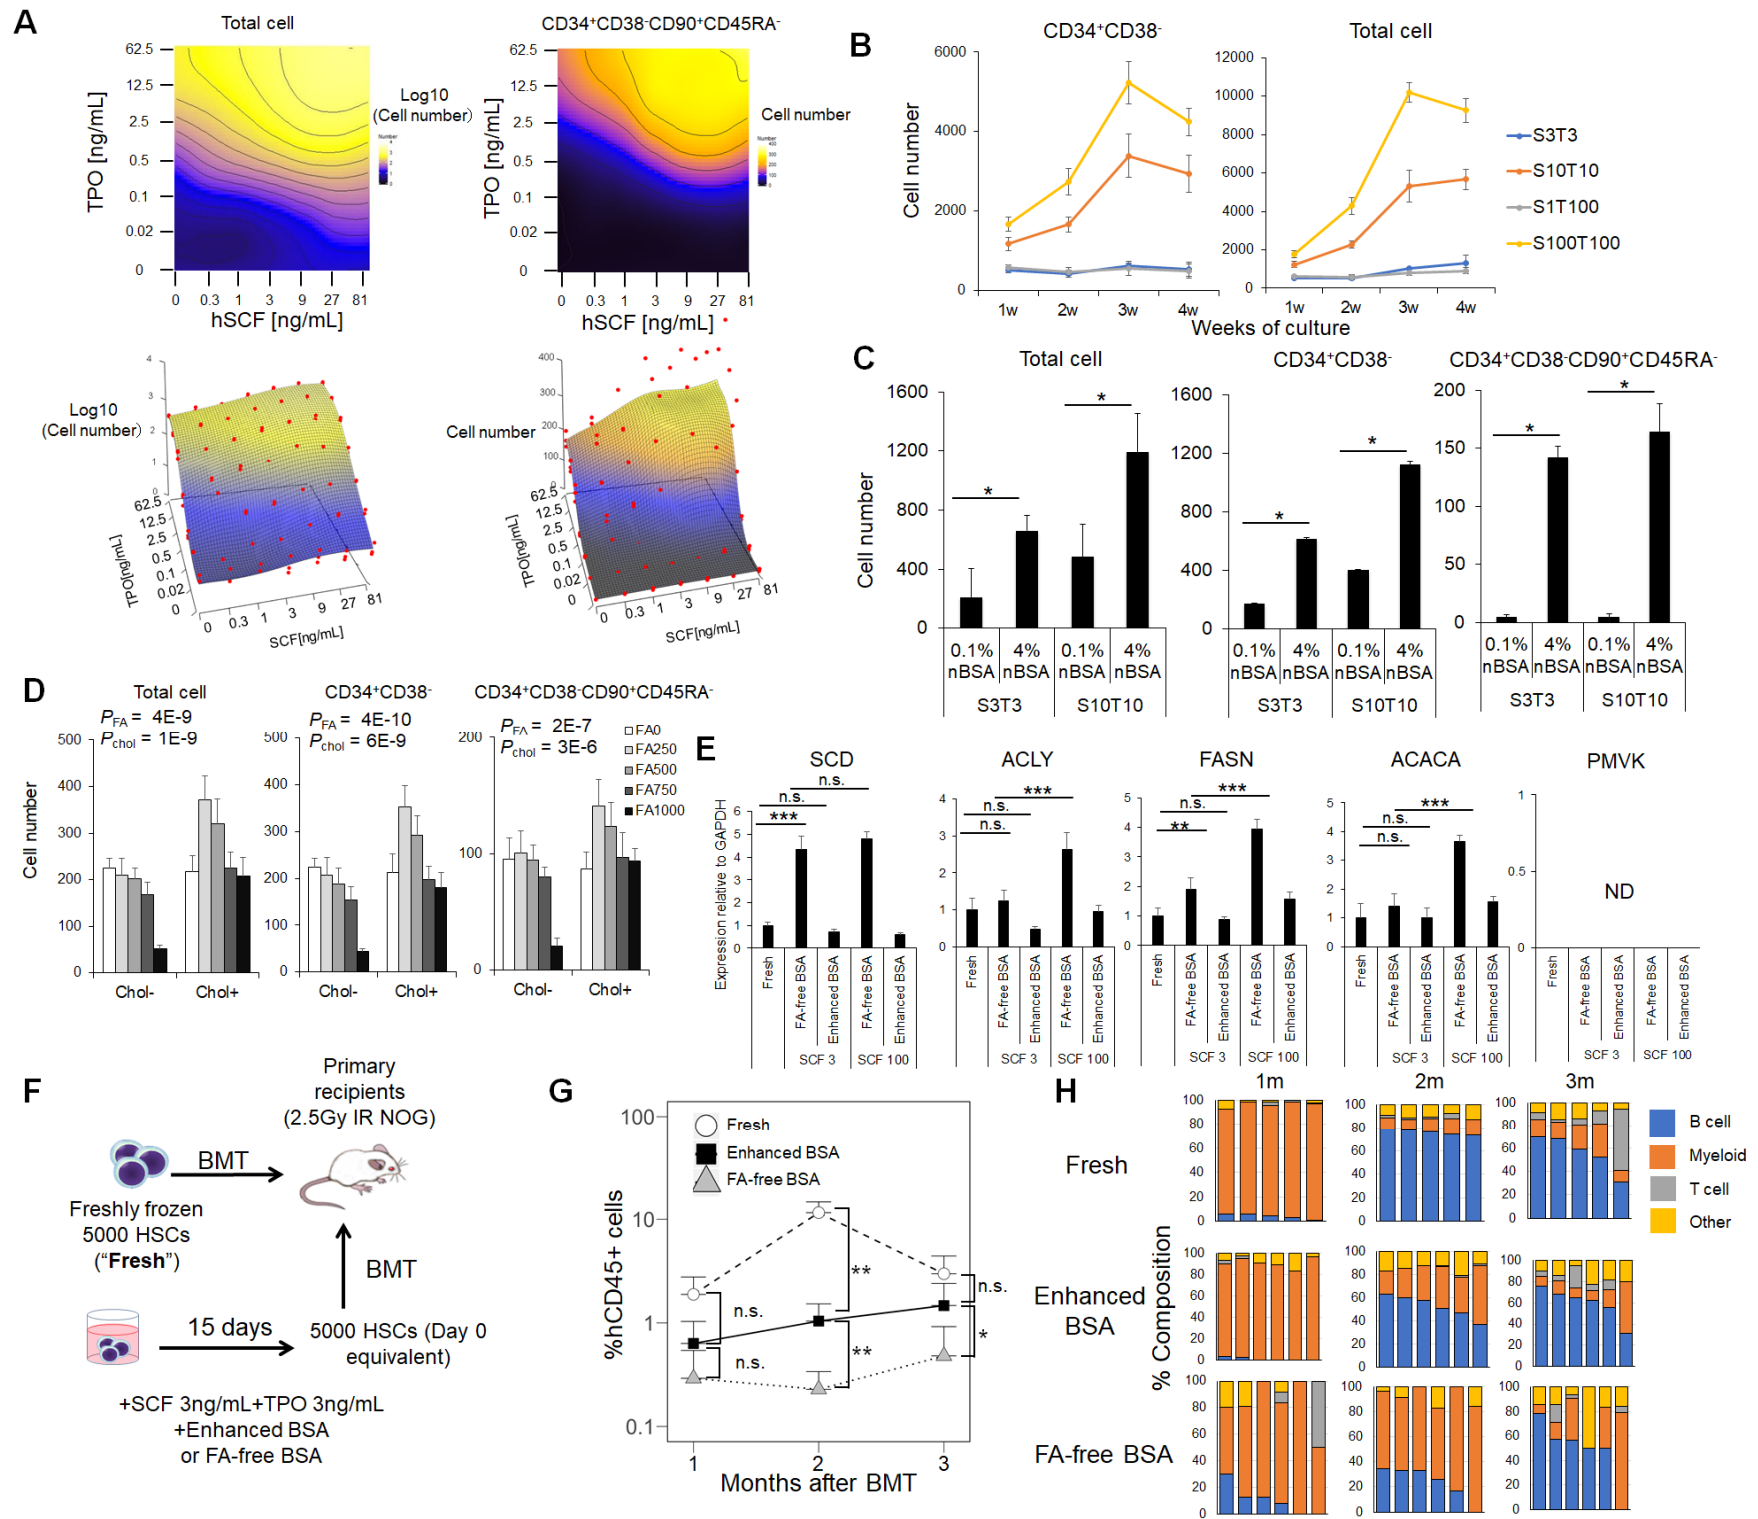



**Figure S1.**

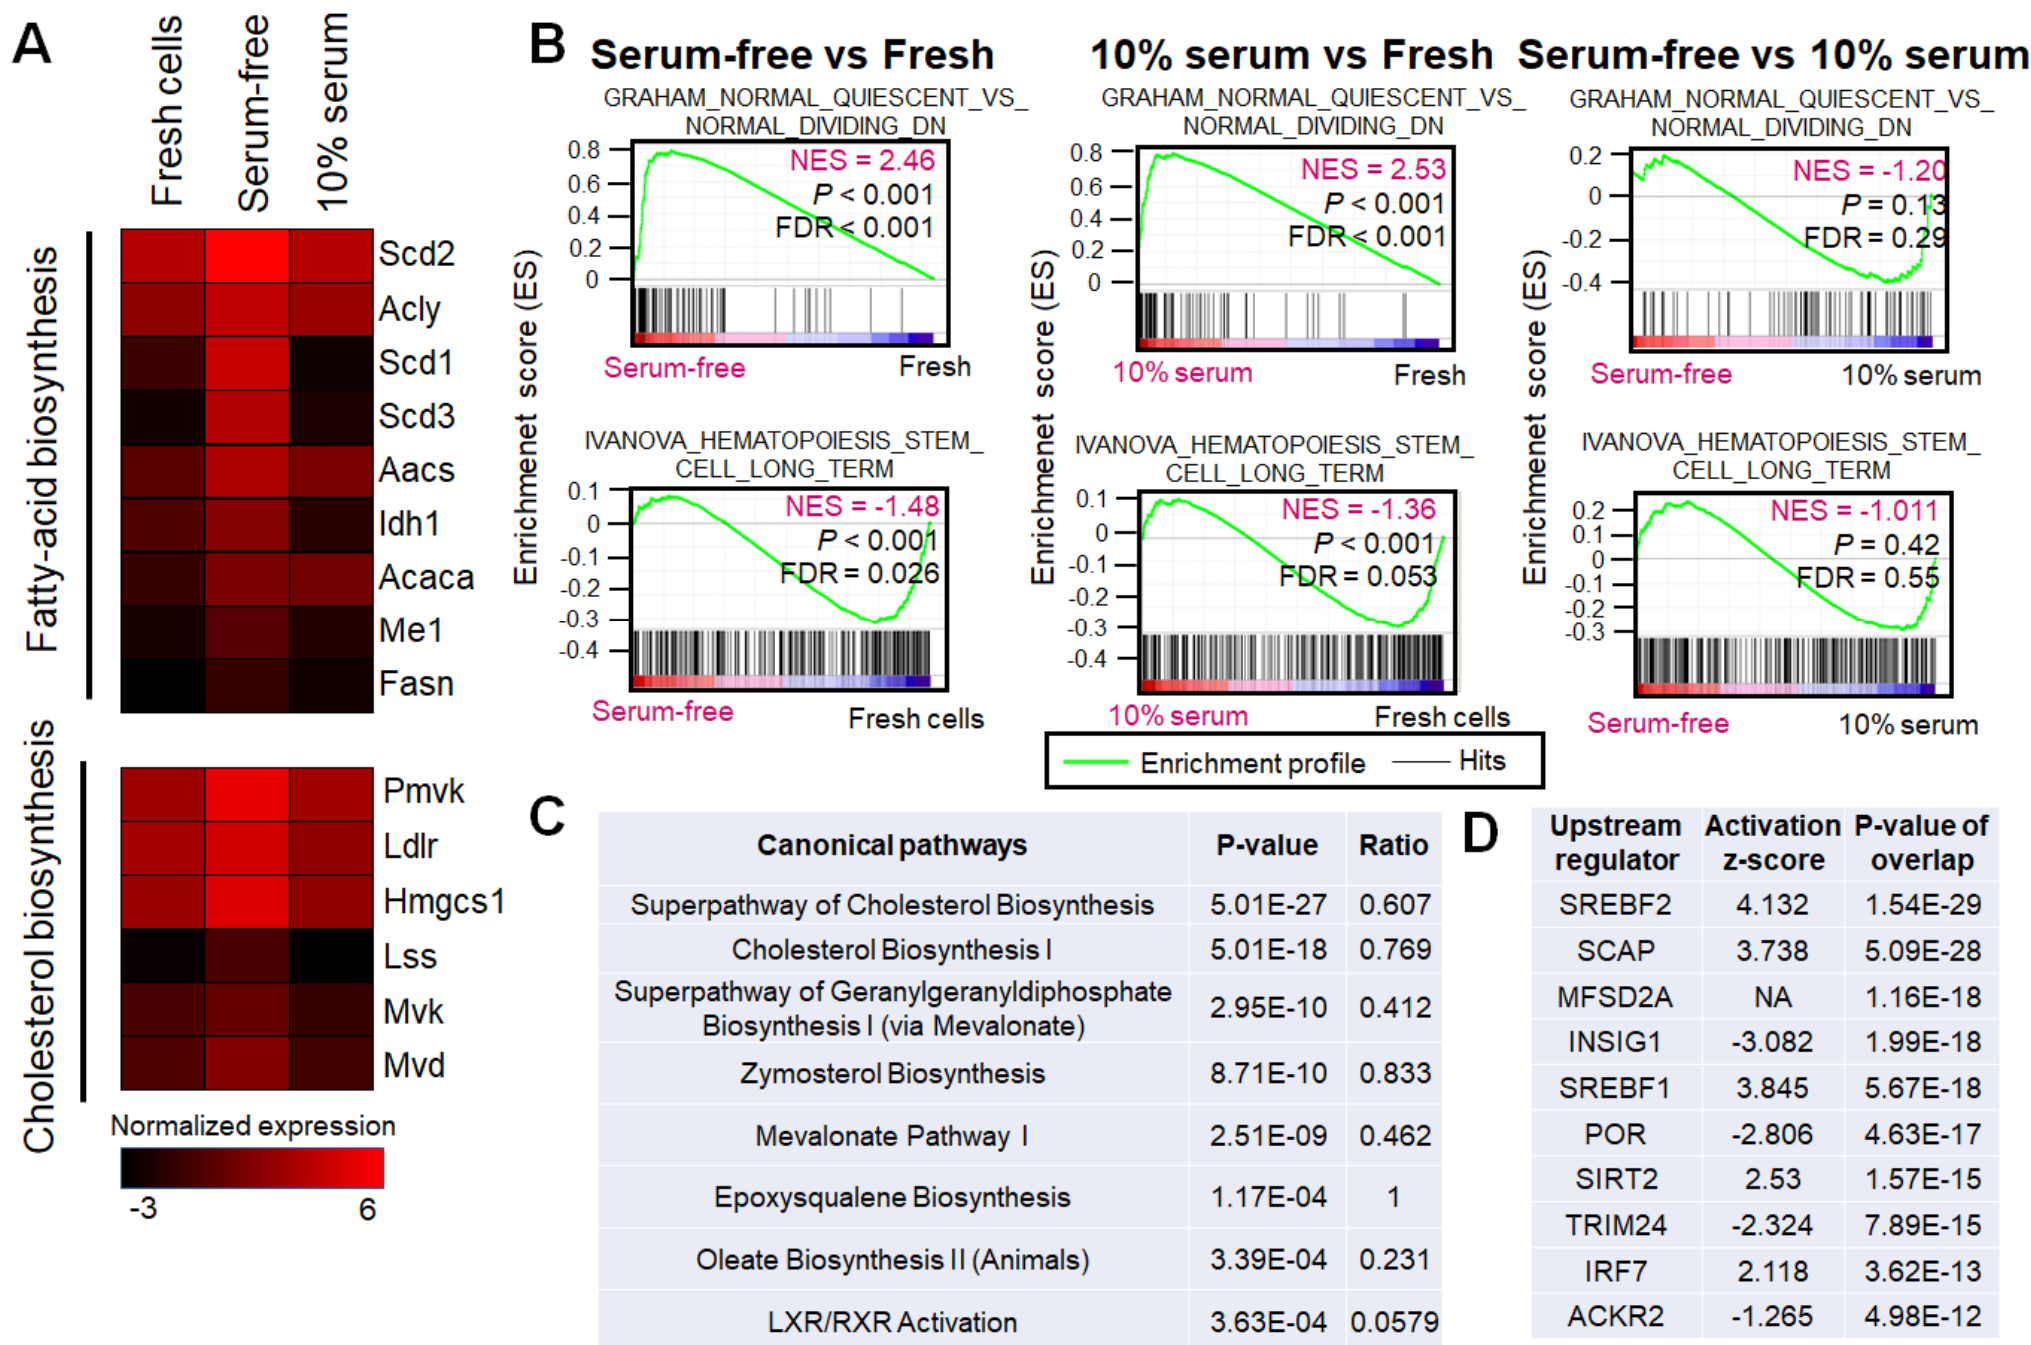

**Figure S2.**

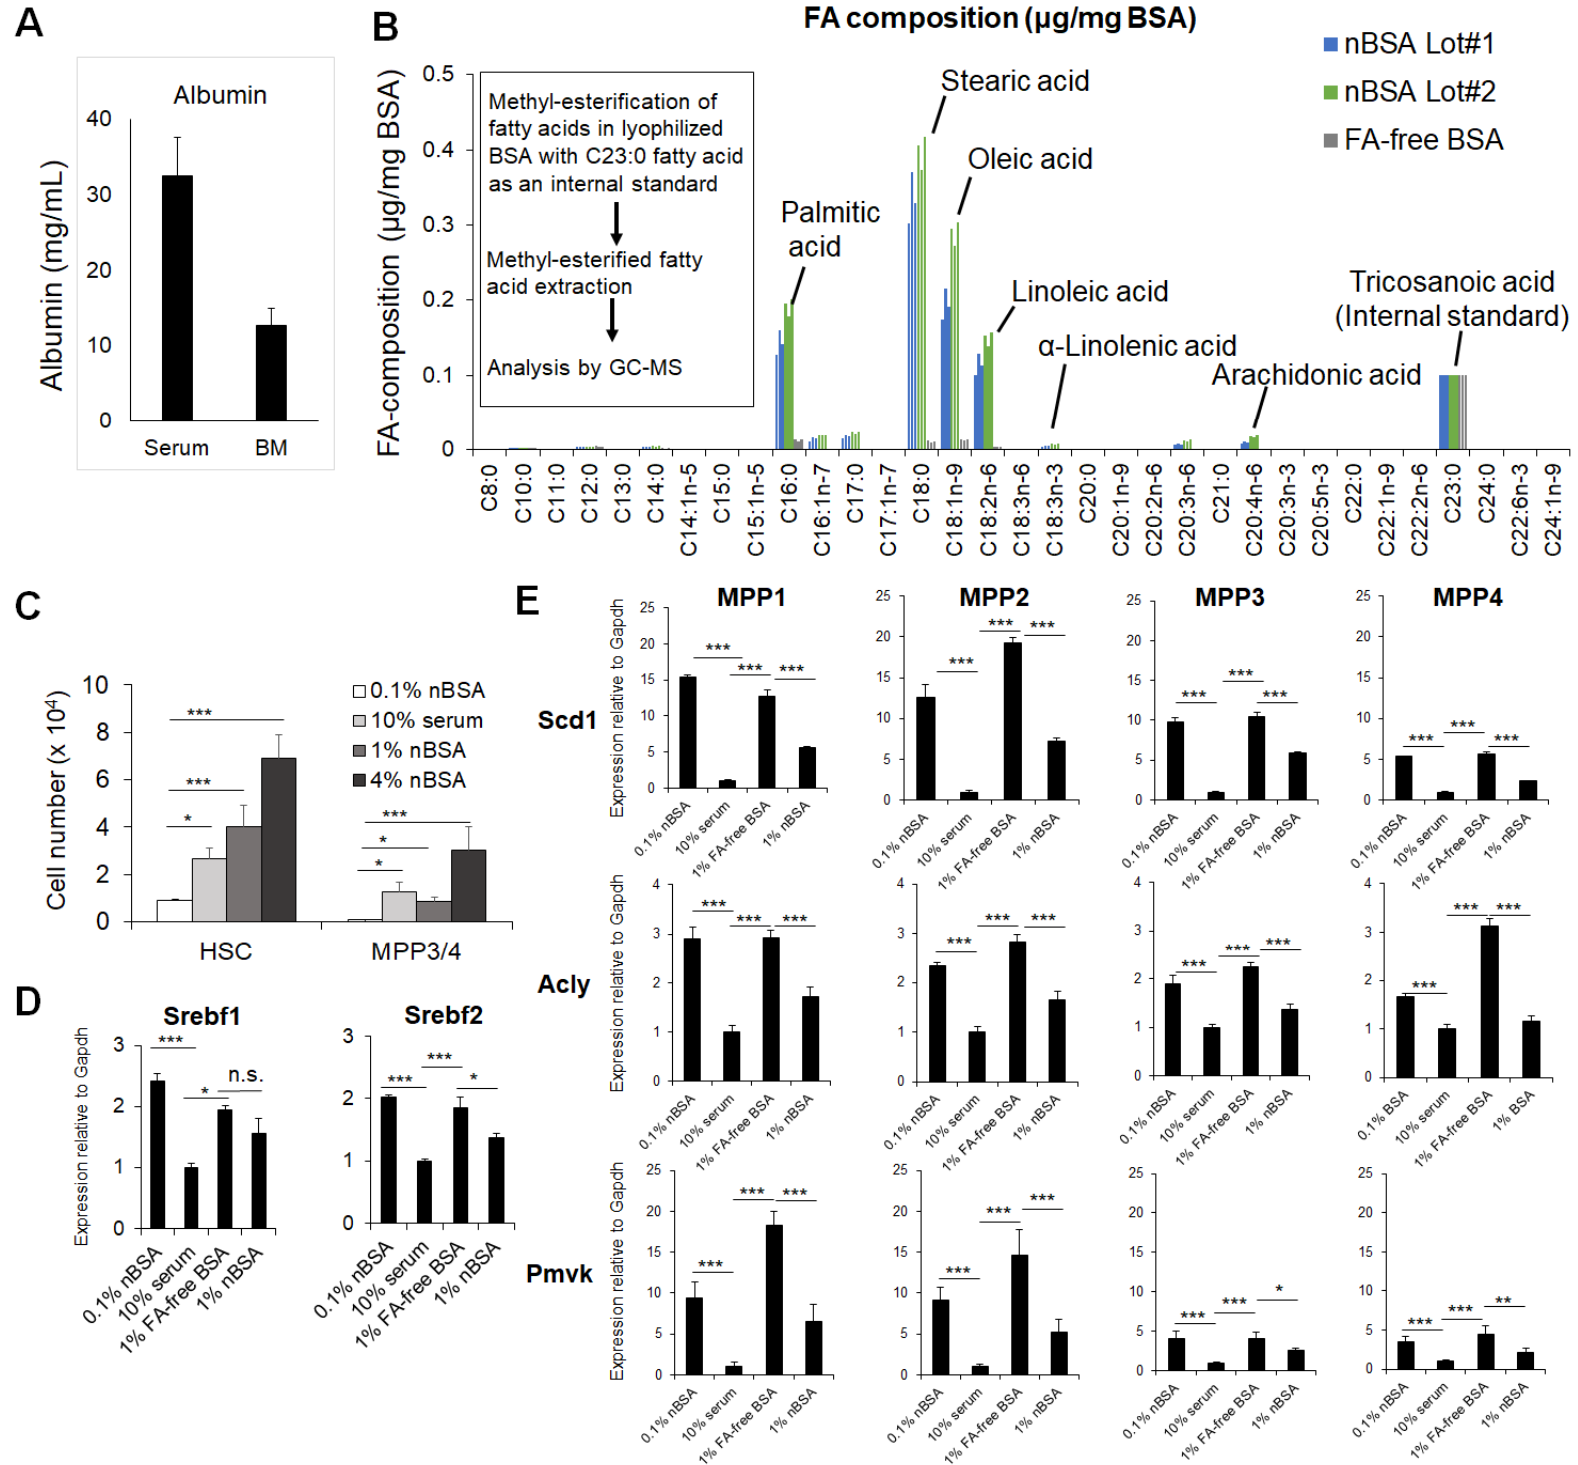

**Figure S3.**

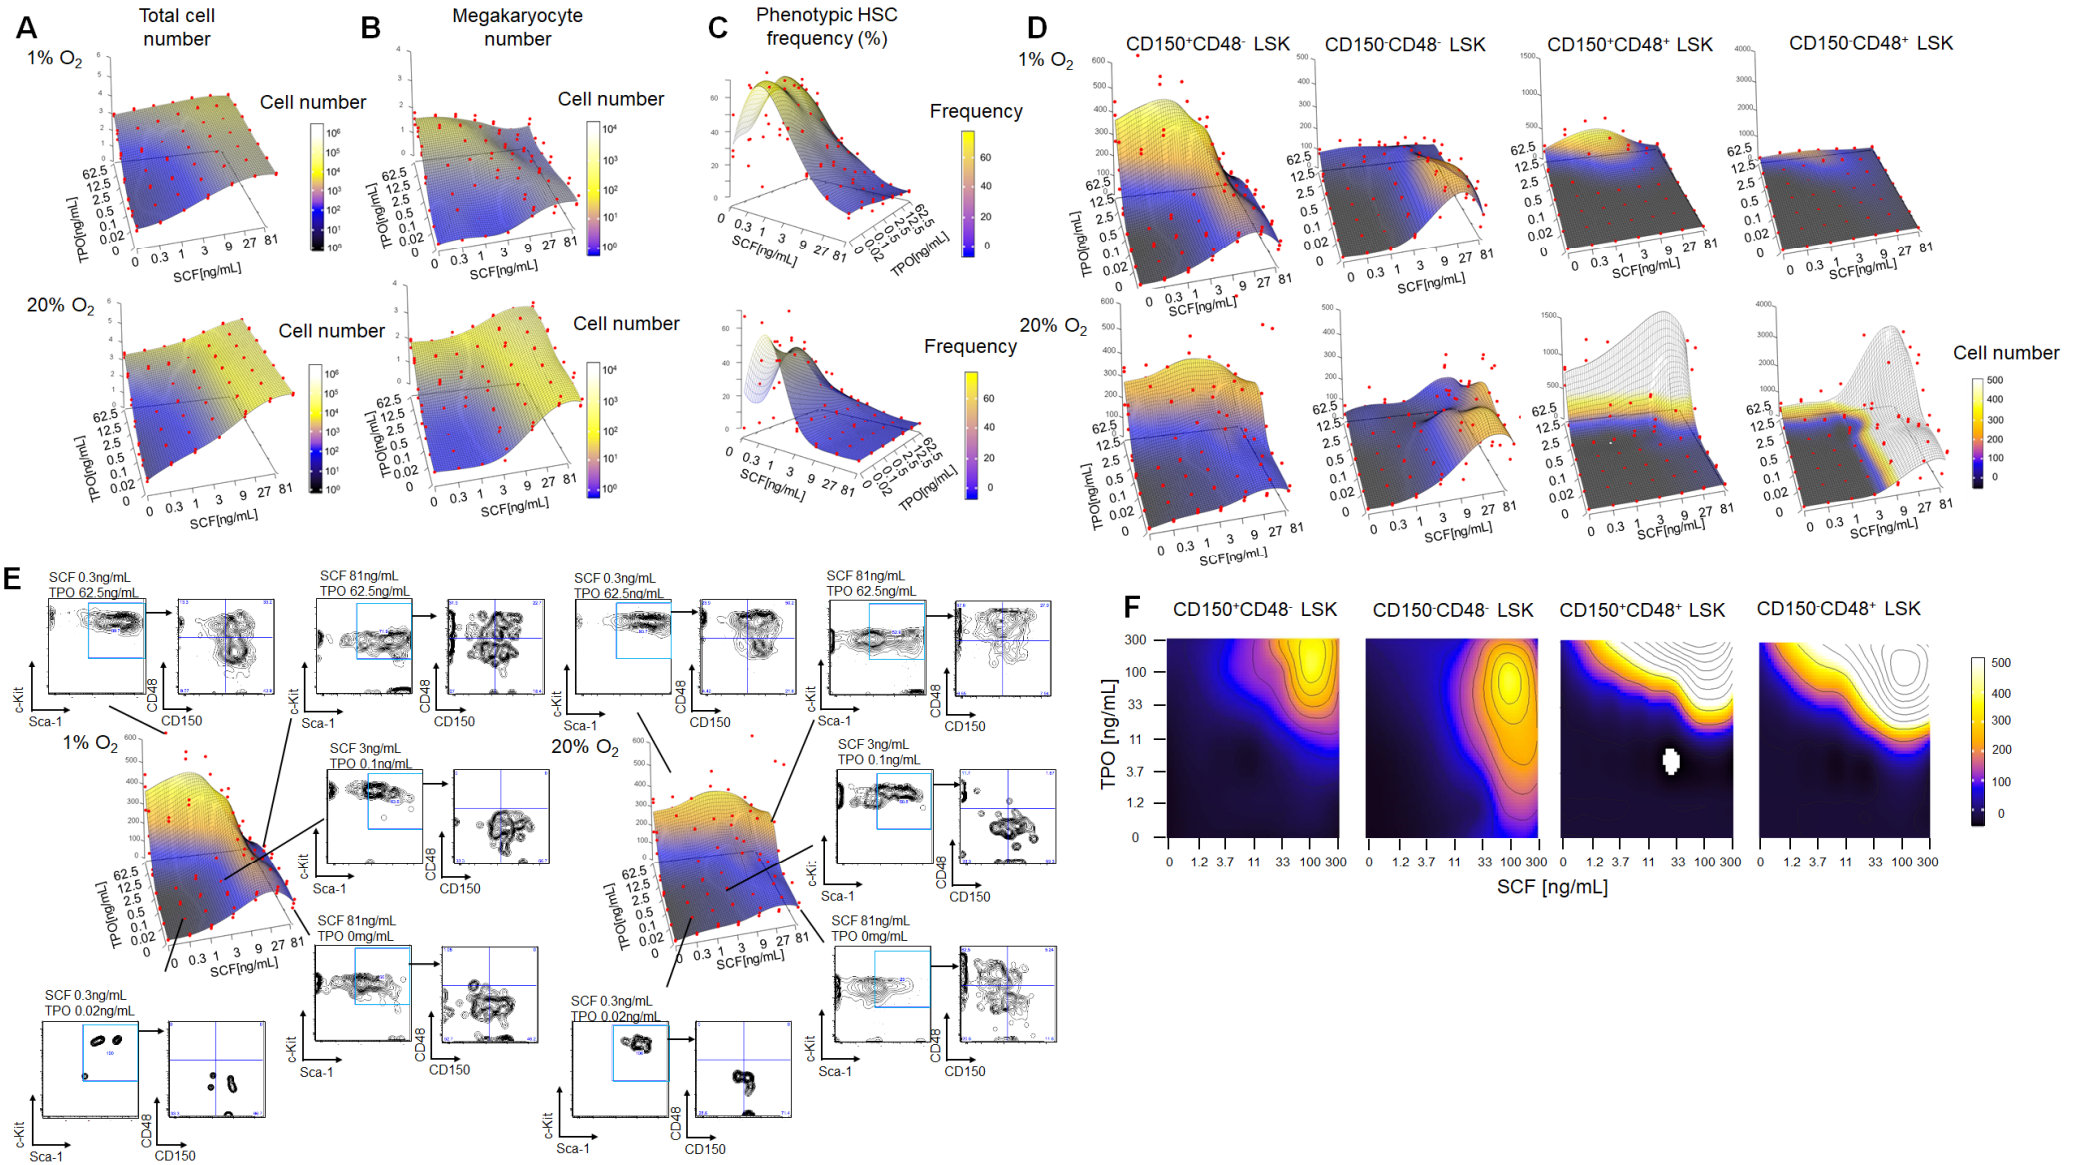



**Figure S4.**

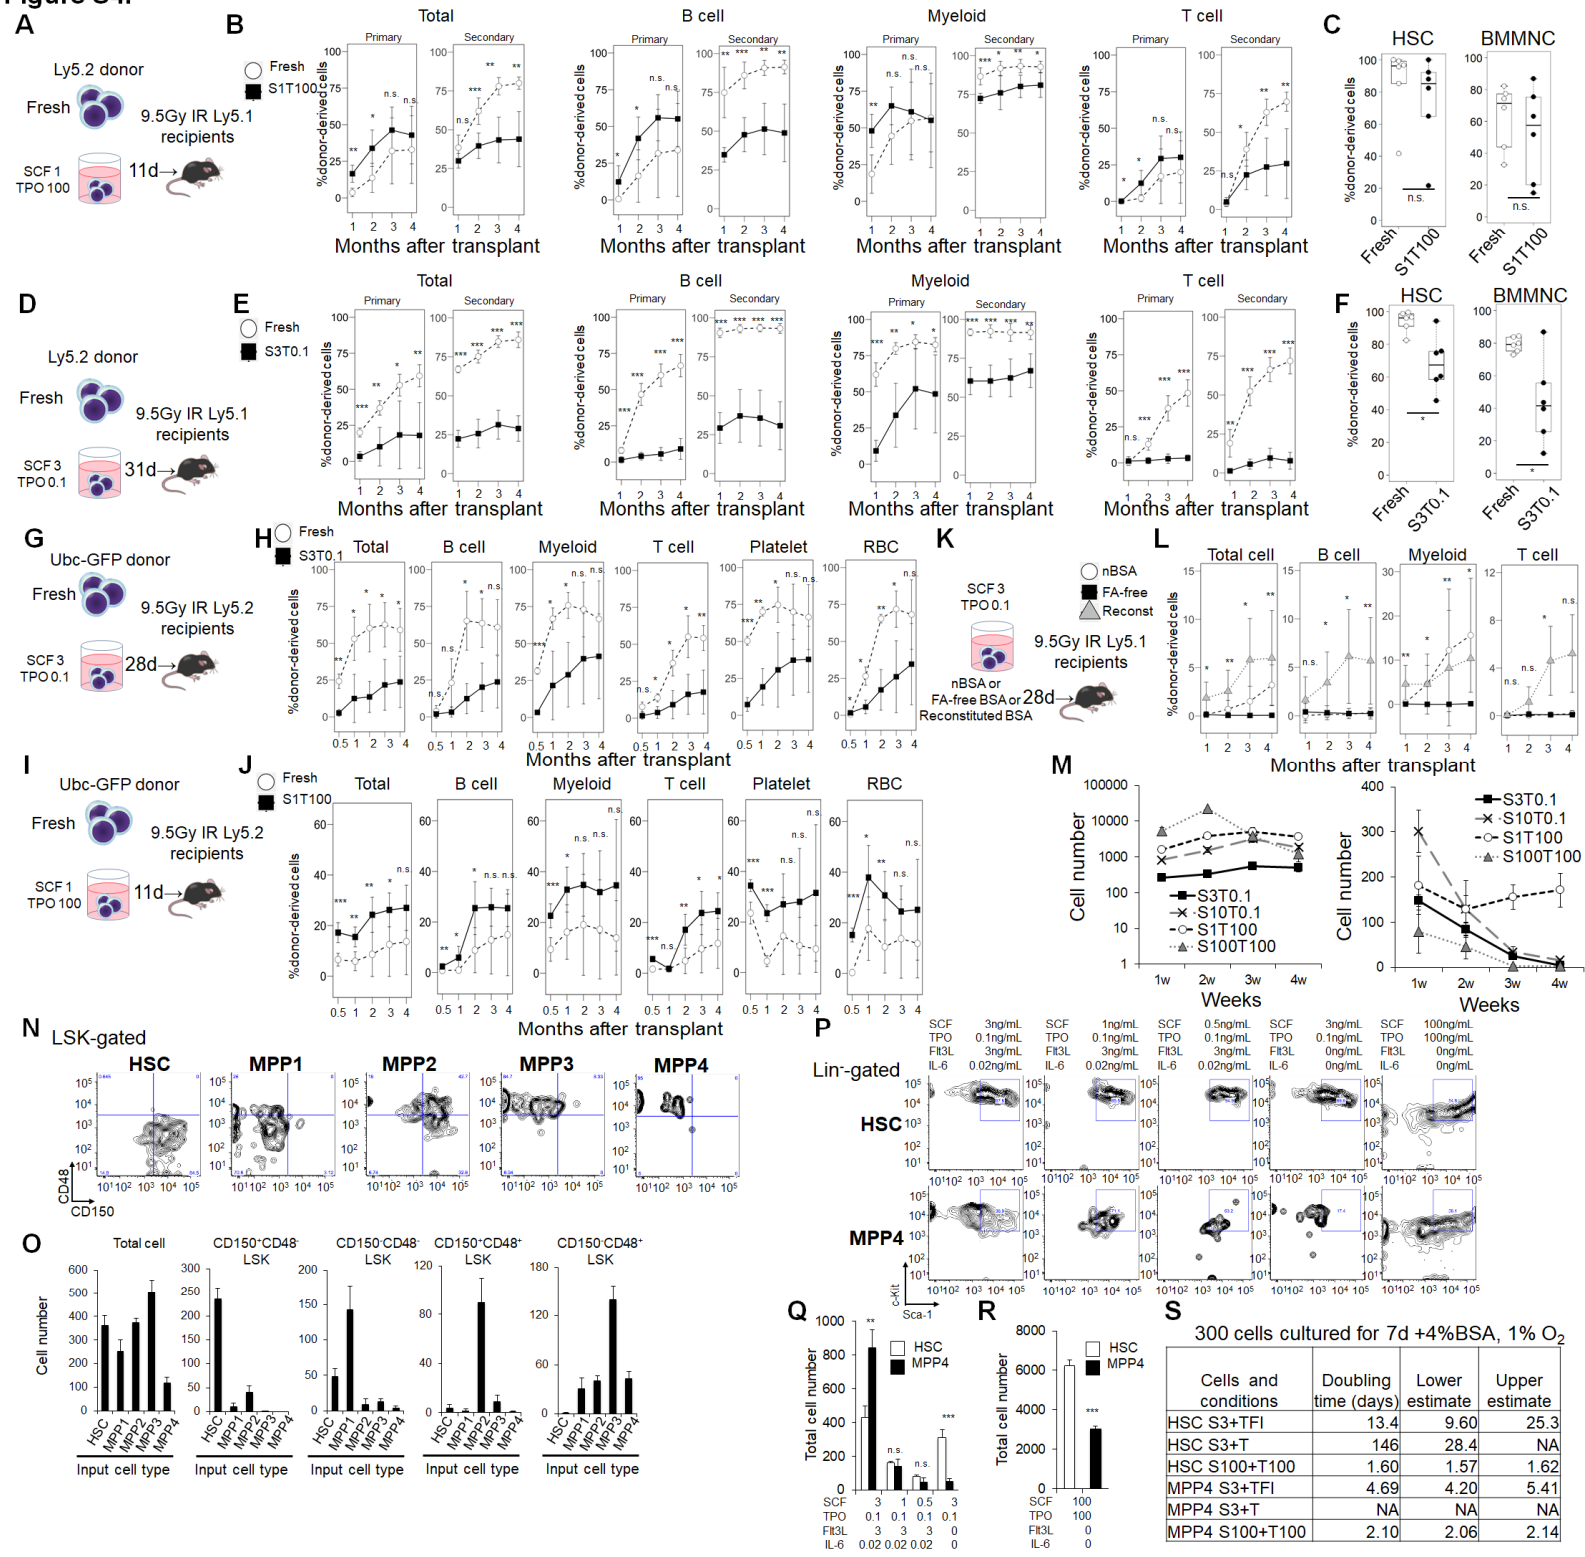

**Figure S5.**

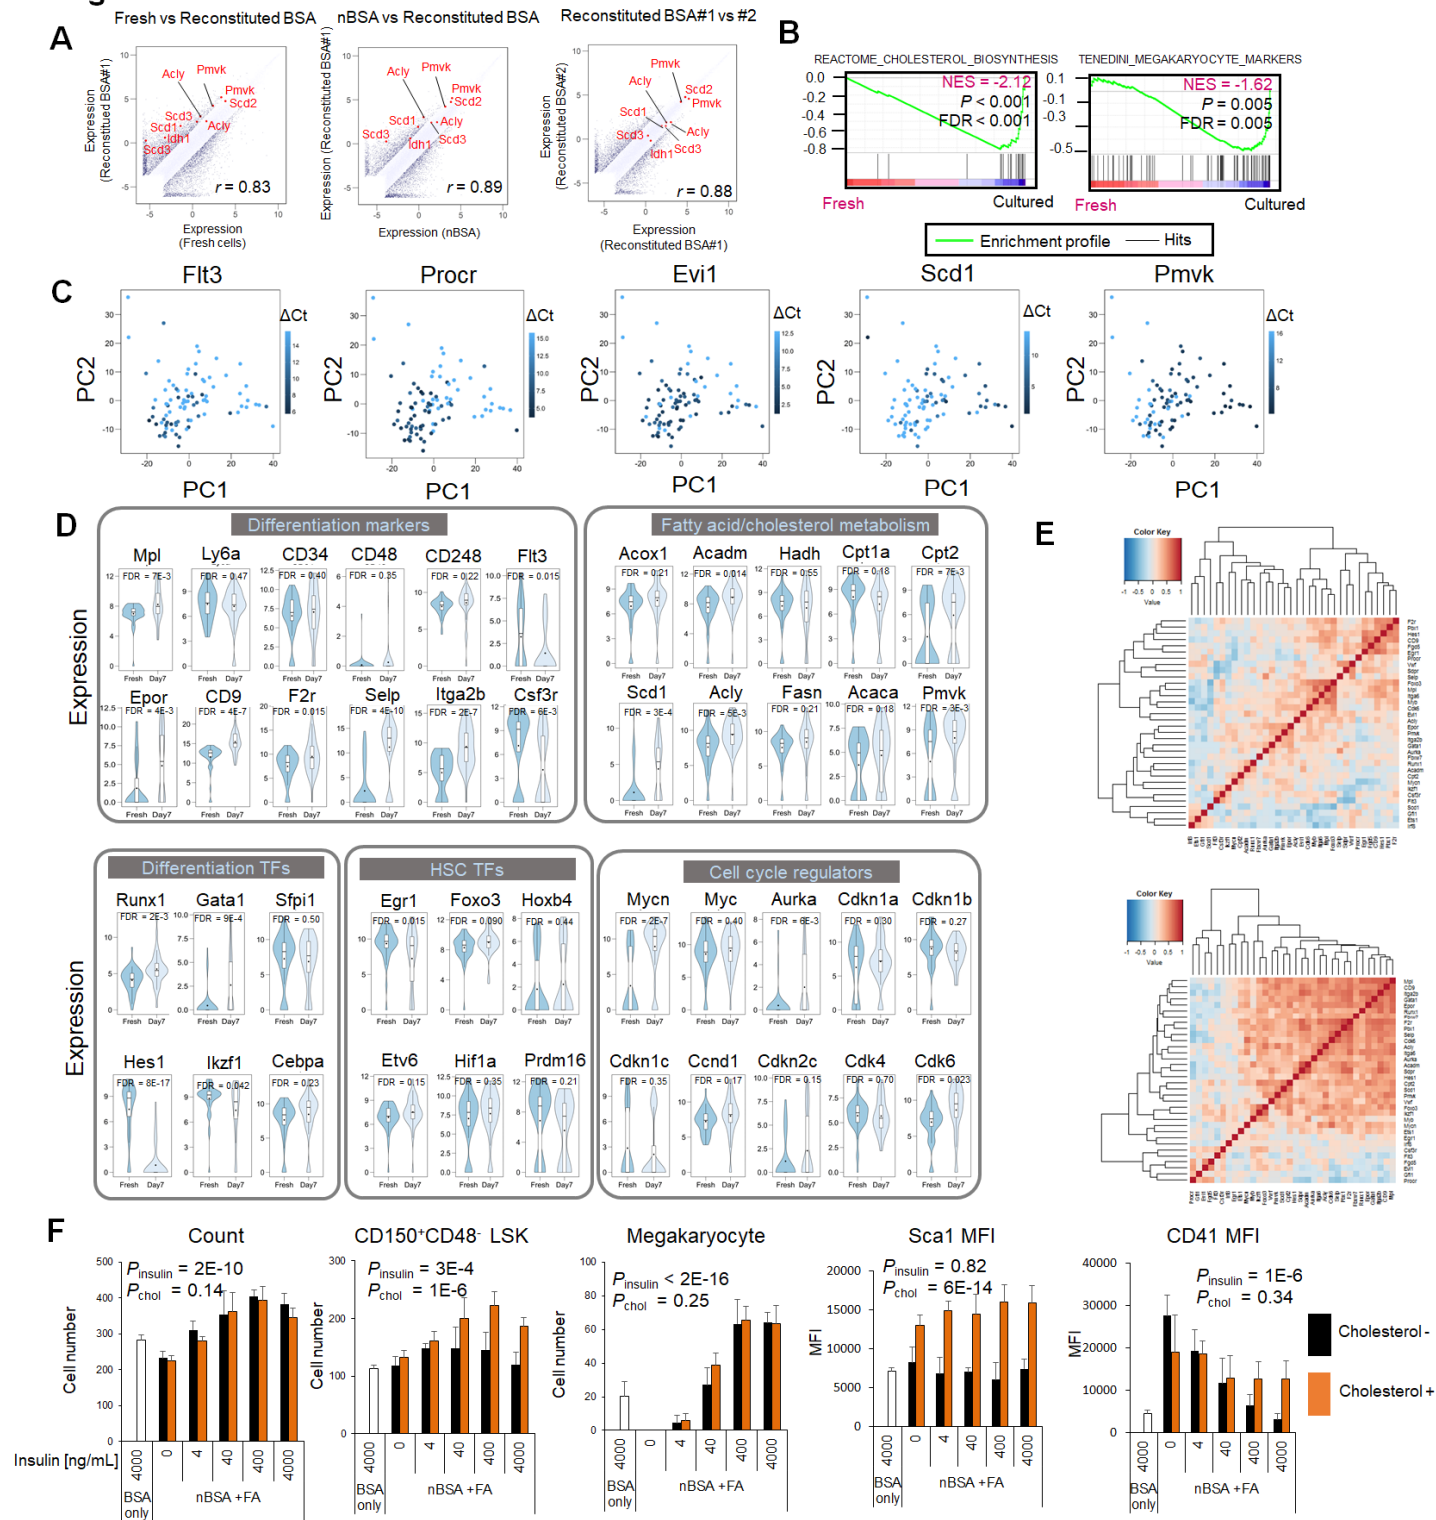

Figure S6.

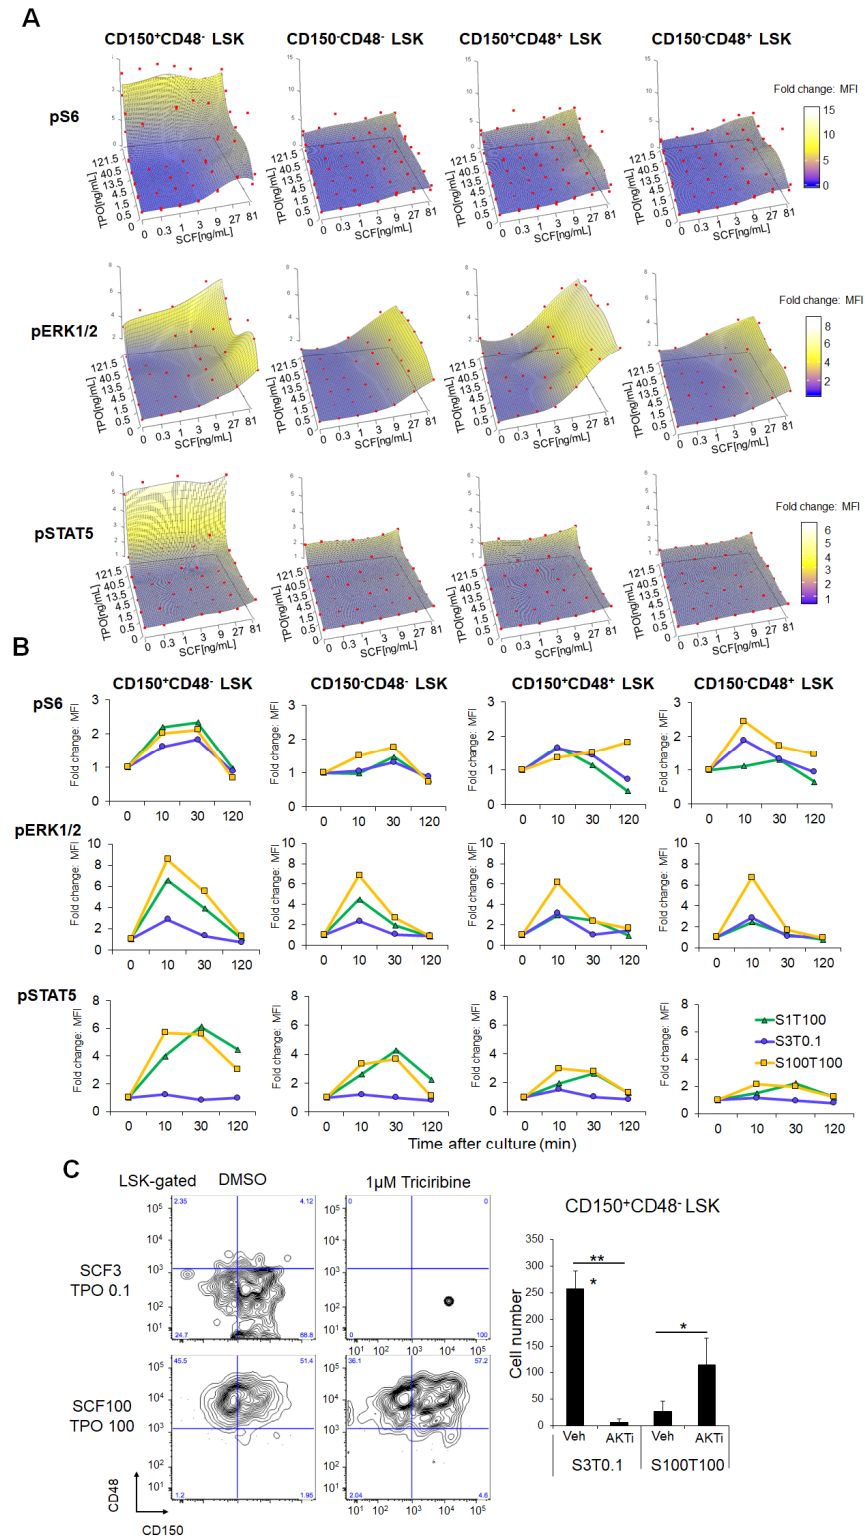

Source: https://www.biorxiv.org/content/10.1101/475905v2.full.pdf
